# Supplementary material
Source: publisher site journal article supplement (https://www.dovepress.com/get_supplementary_file.php?f=471161.docx)
Supplement: Supplementary file 1 [file get_supplementary_file.php]

**Supplementary Materials**

**< Figure S1>**

| 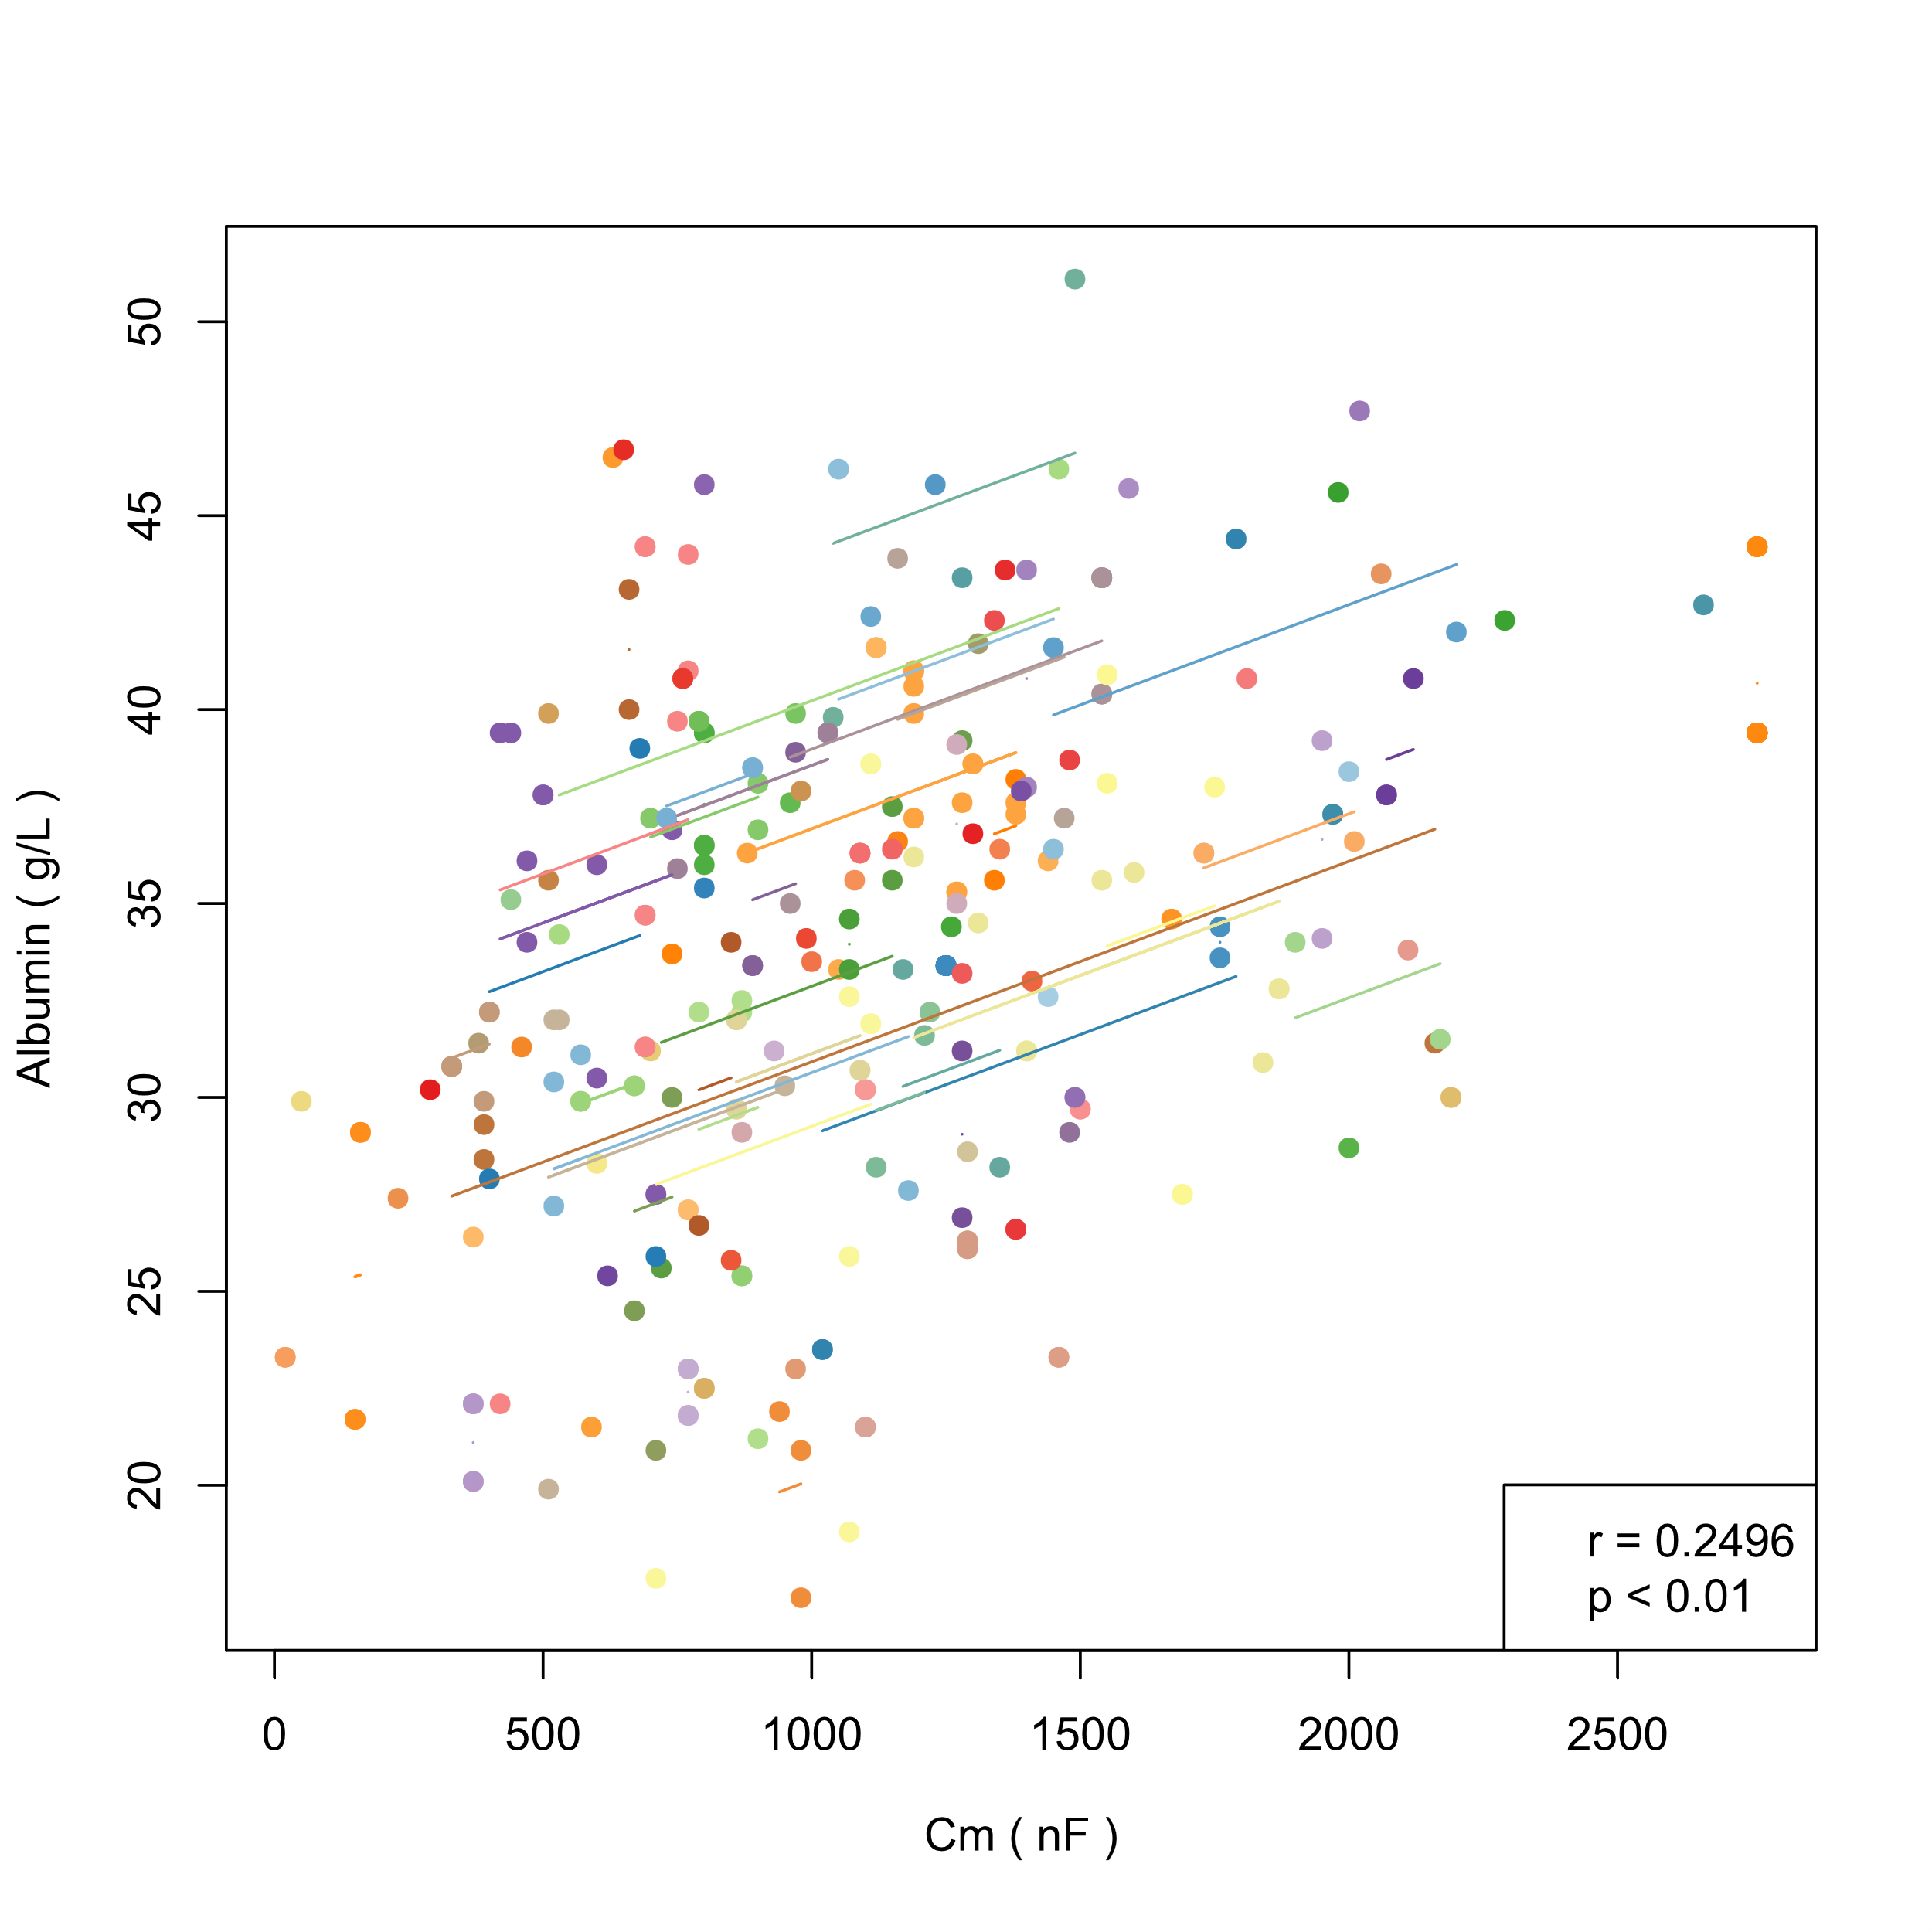  **(a)** Alb and Cm | 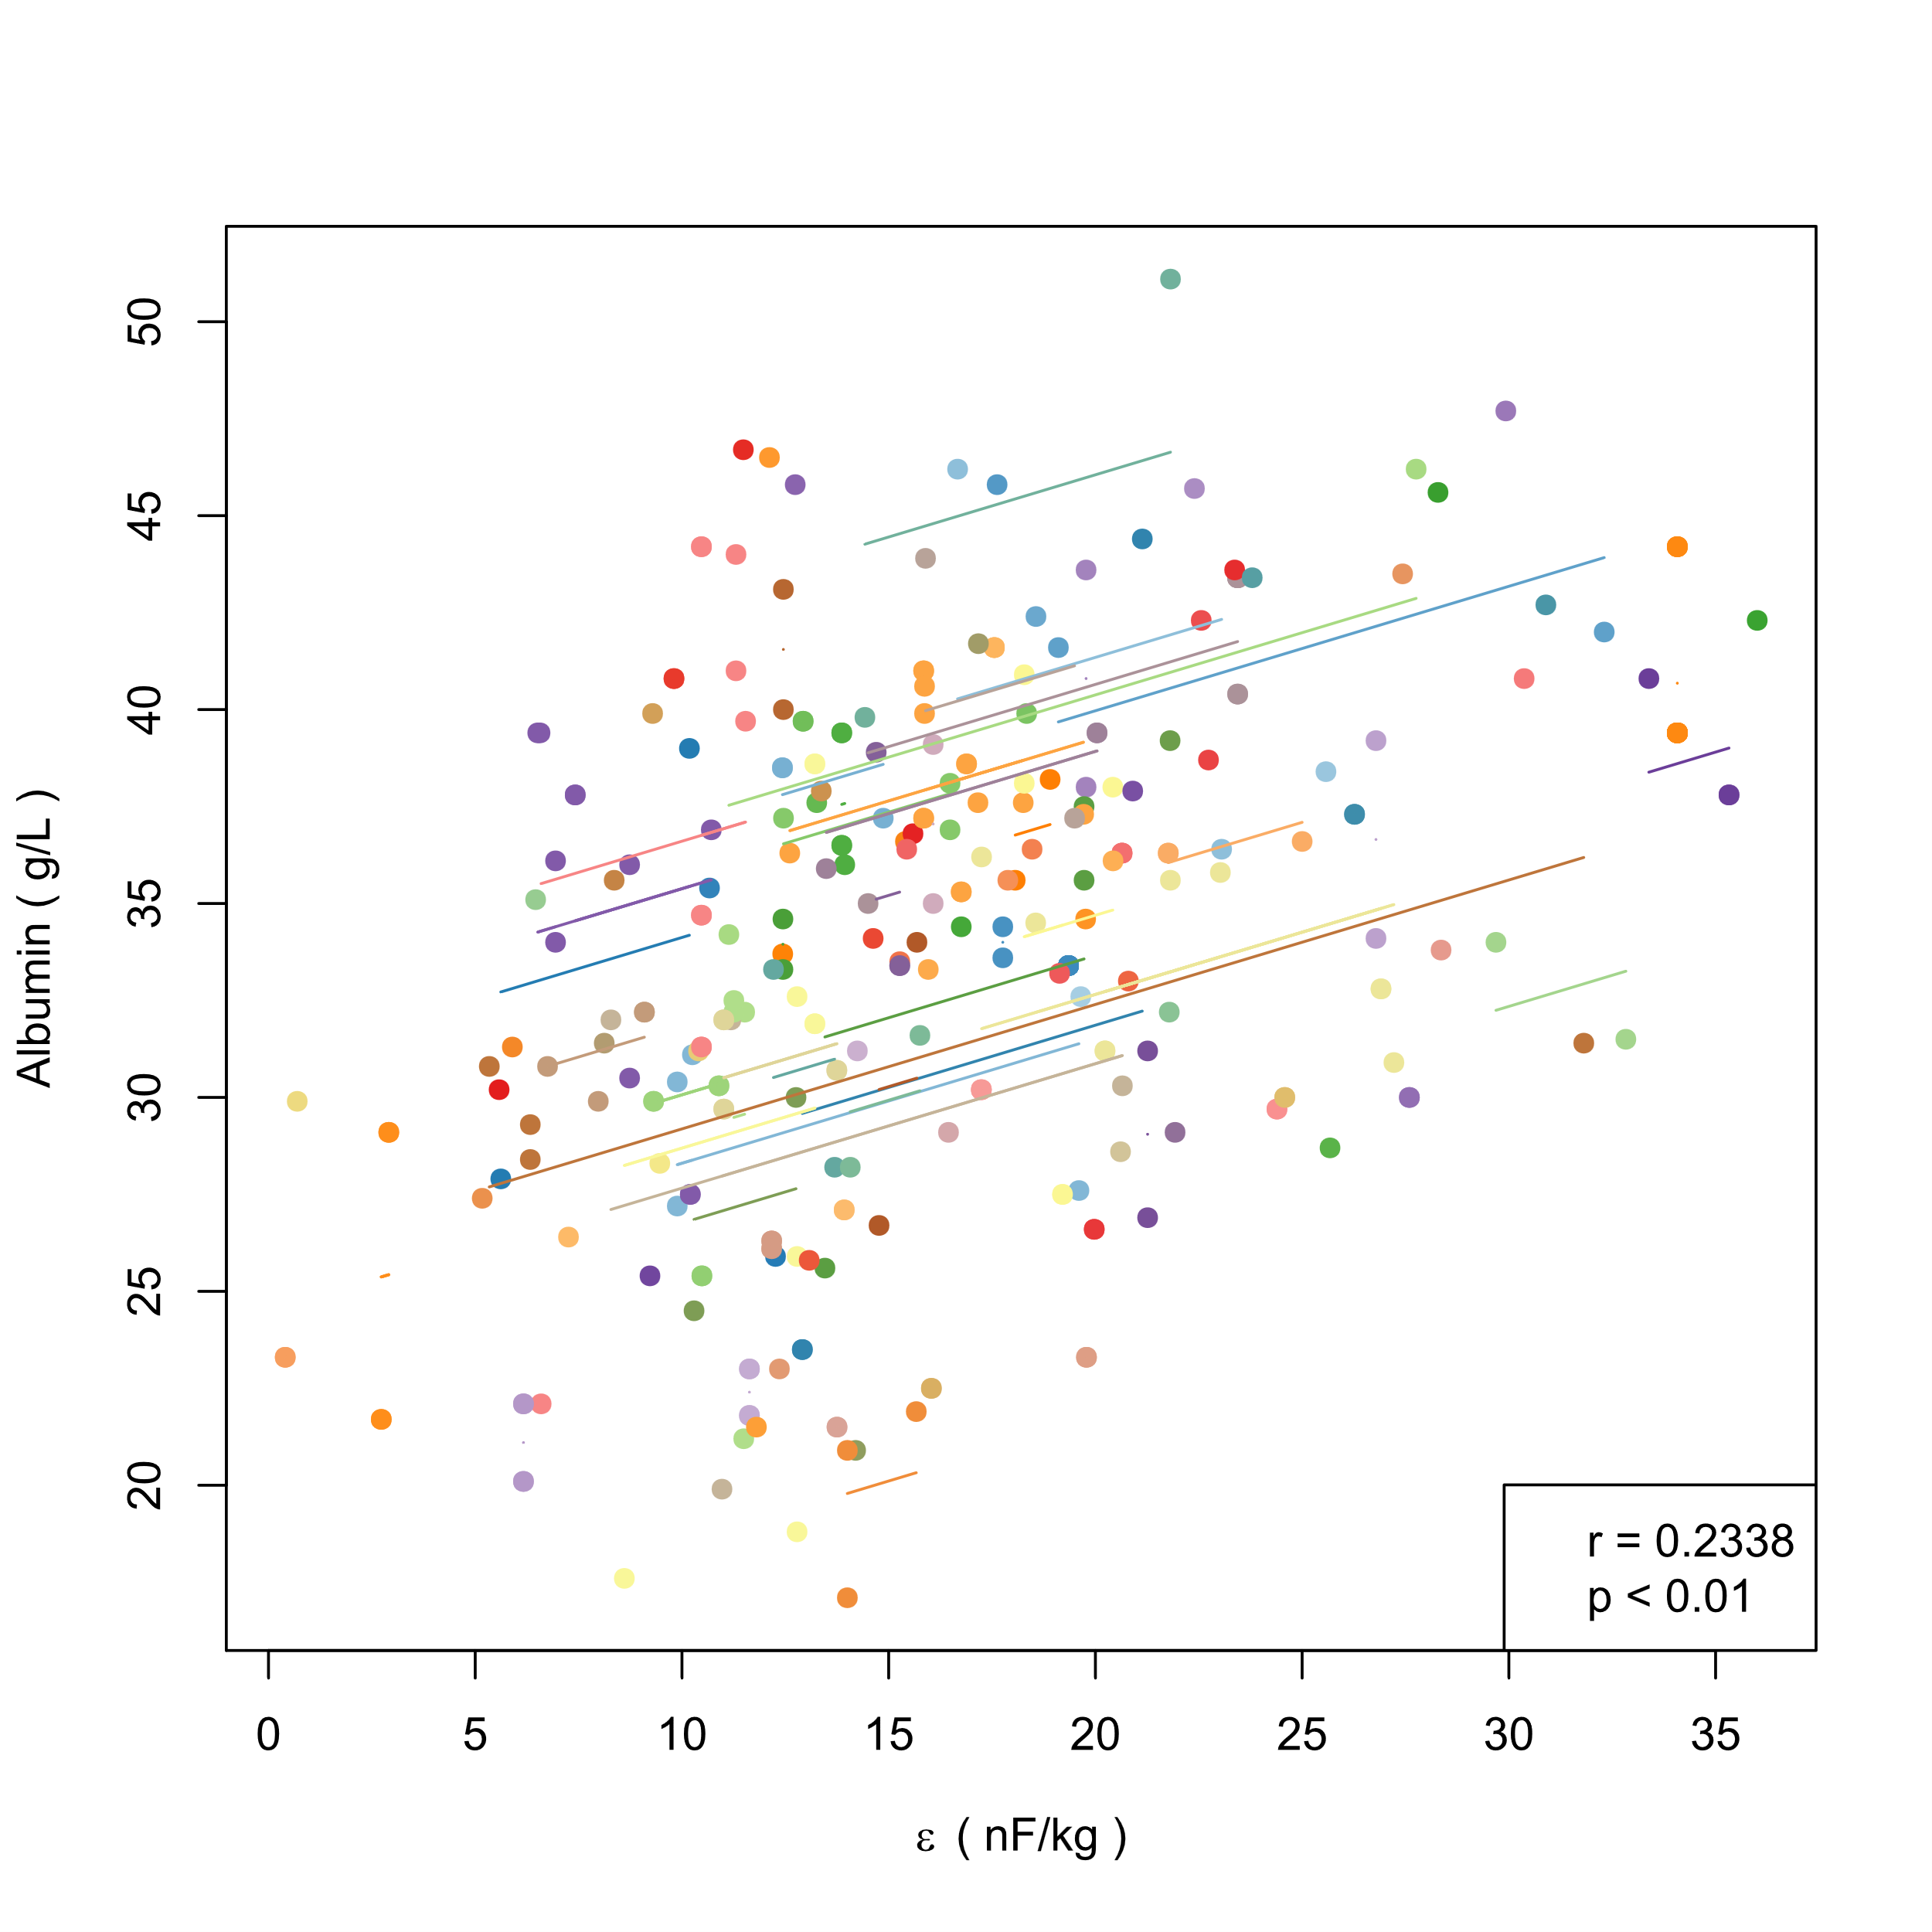  **(b)** Alb and ε |
| --- | --- |
| 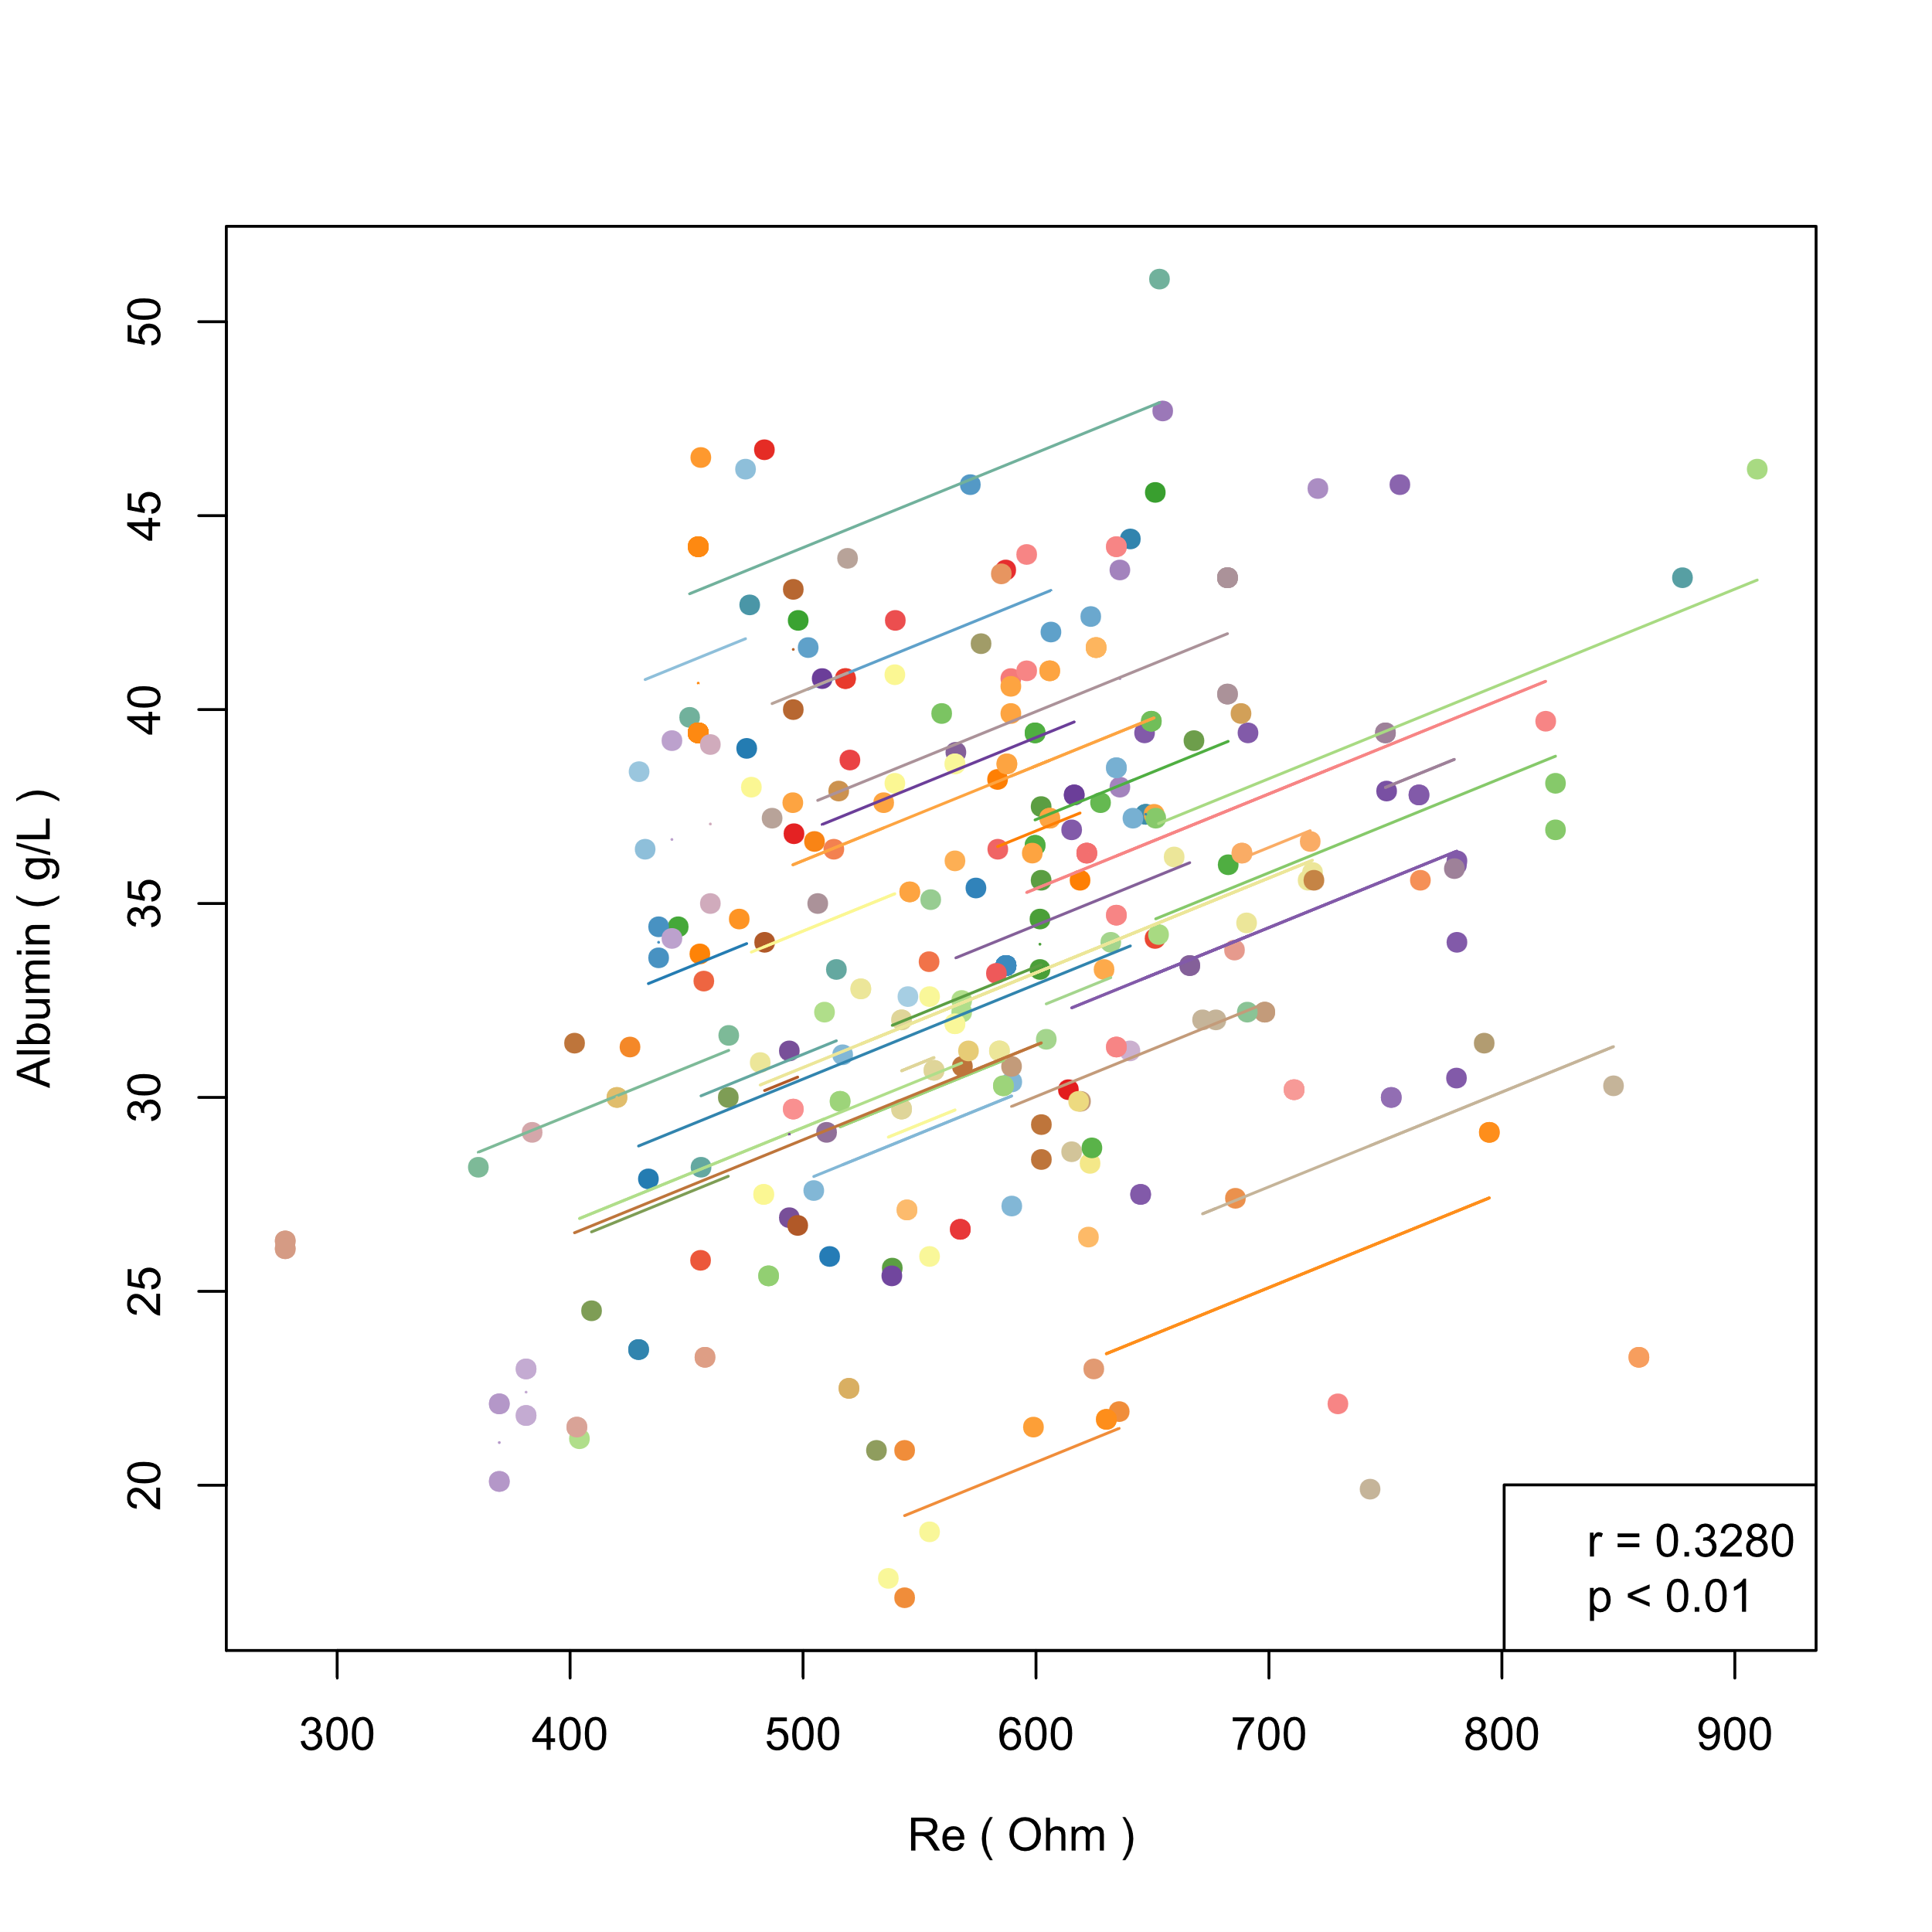  **(c)** Alb and Re | 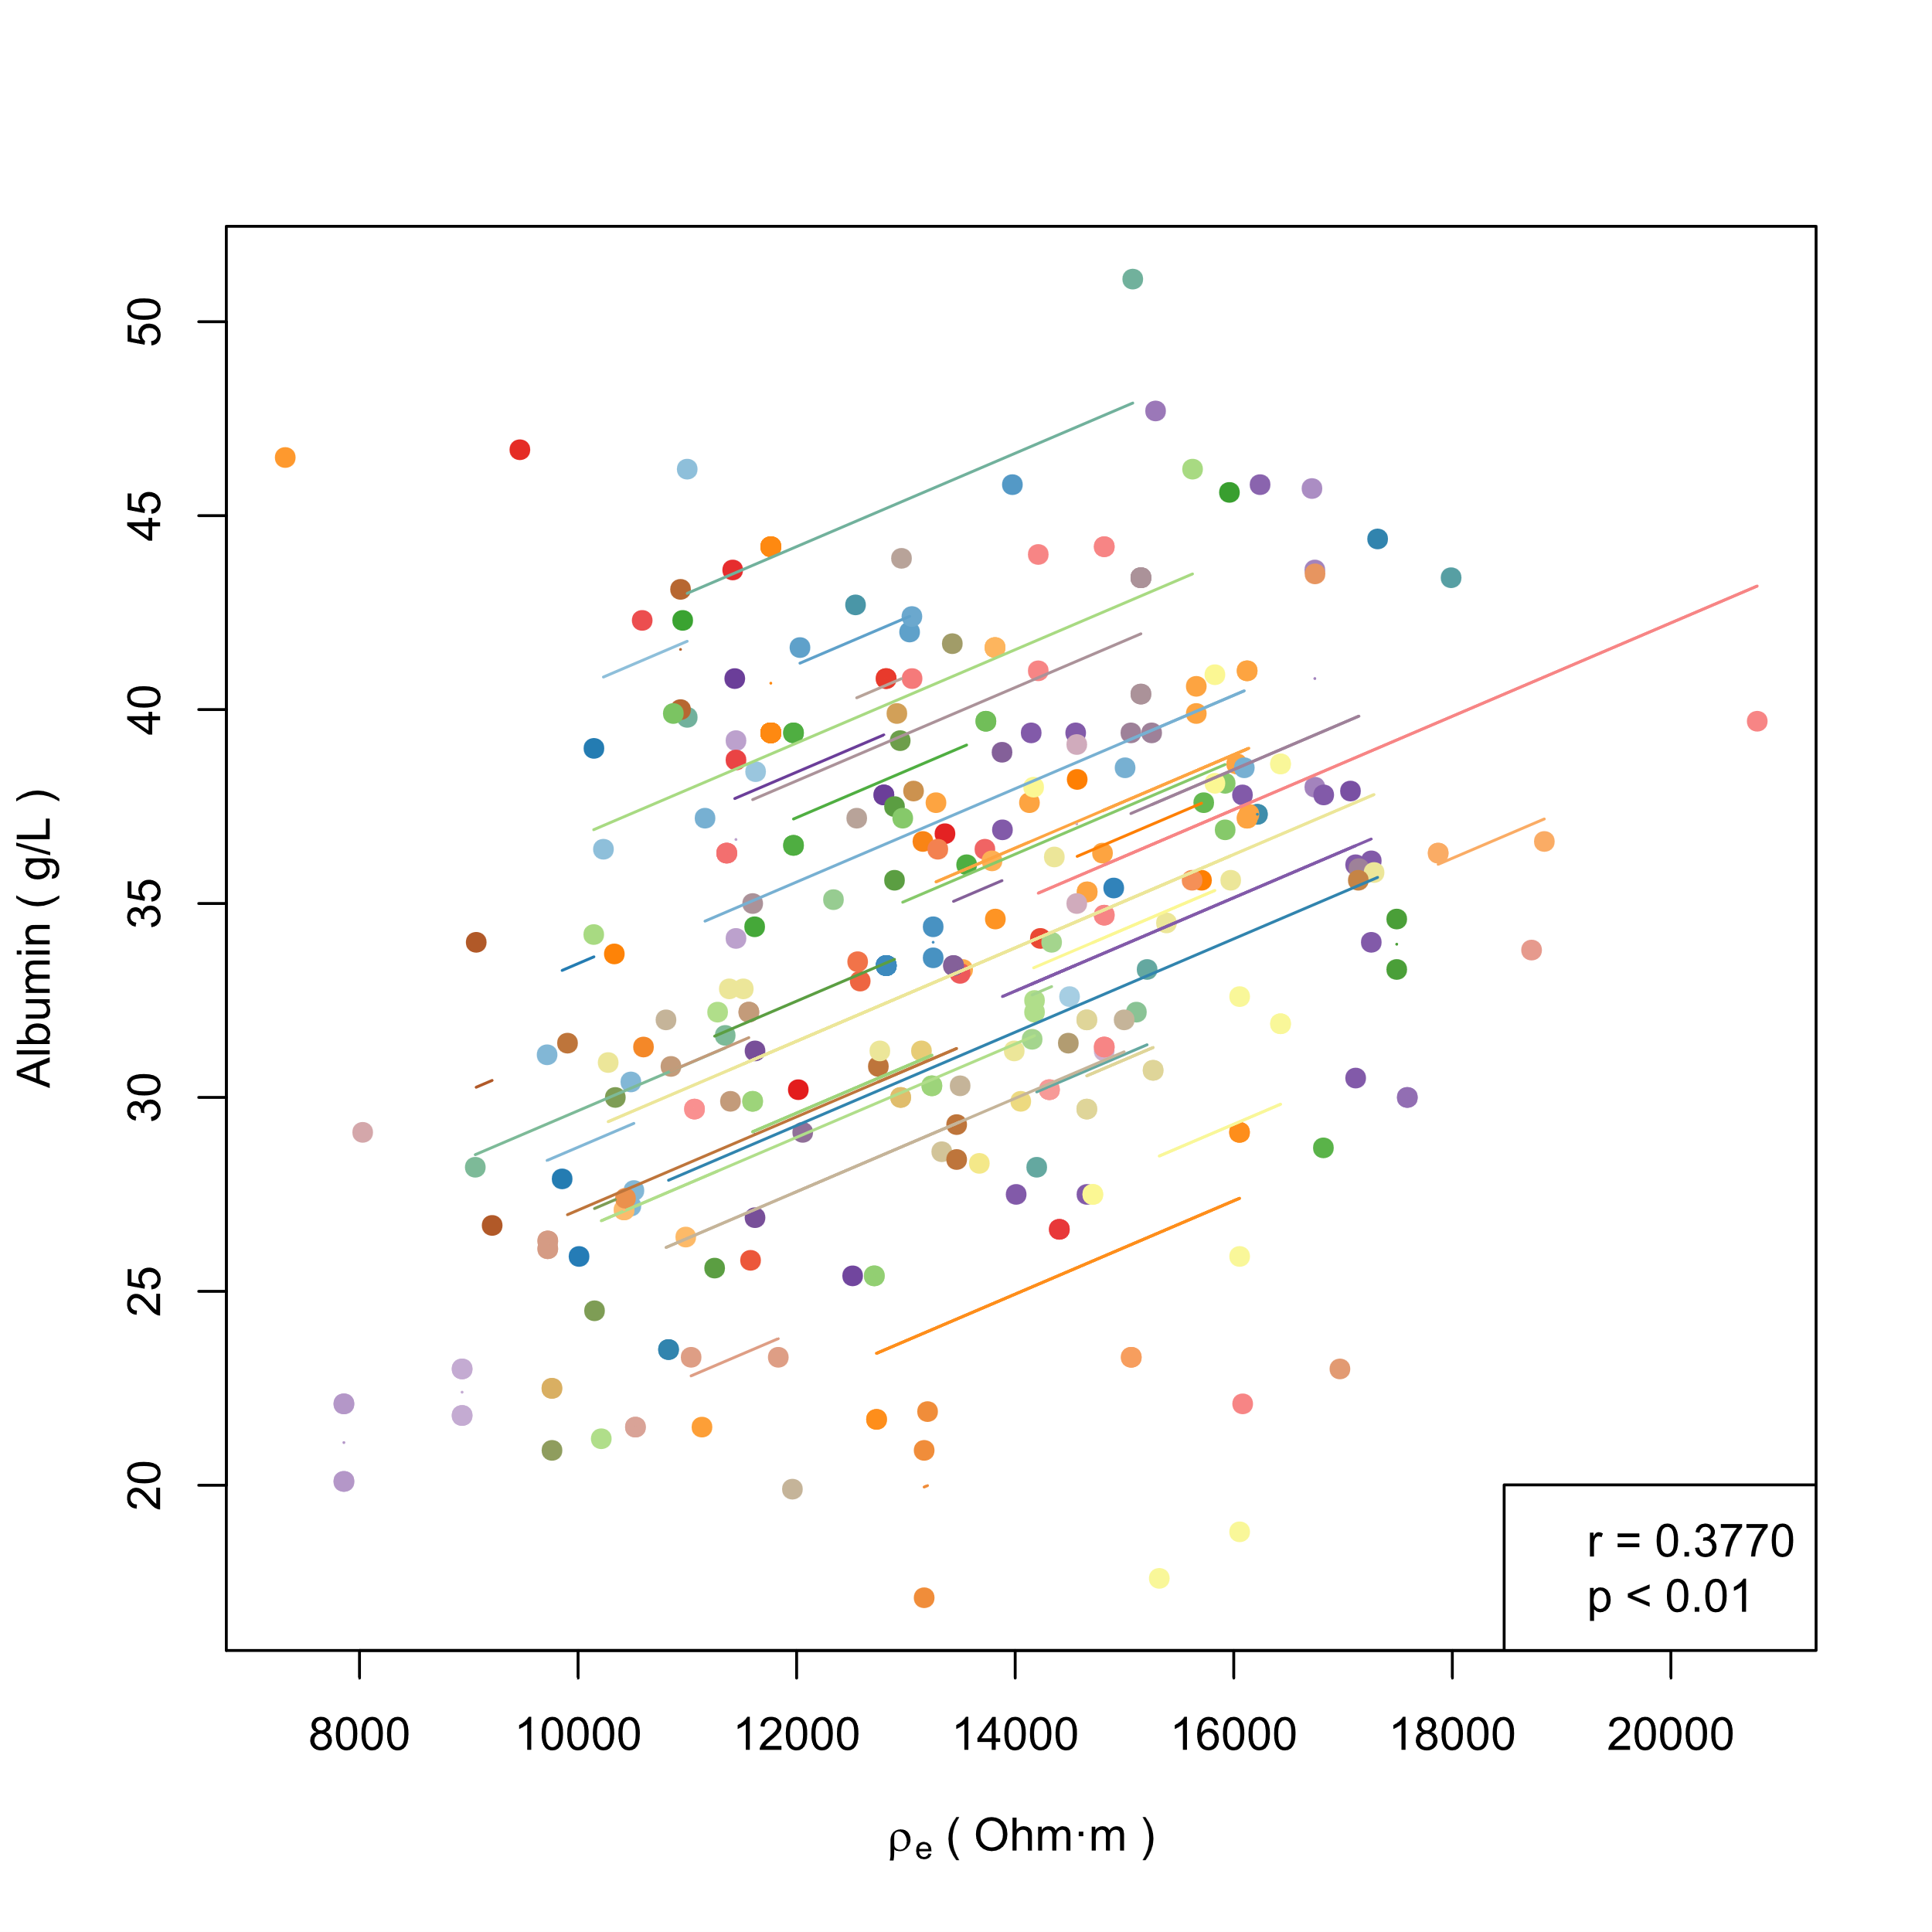  **(d)** Alb and ρe |
| 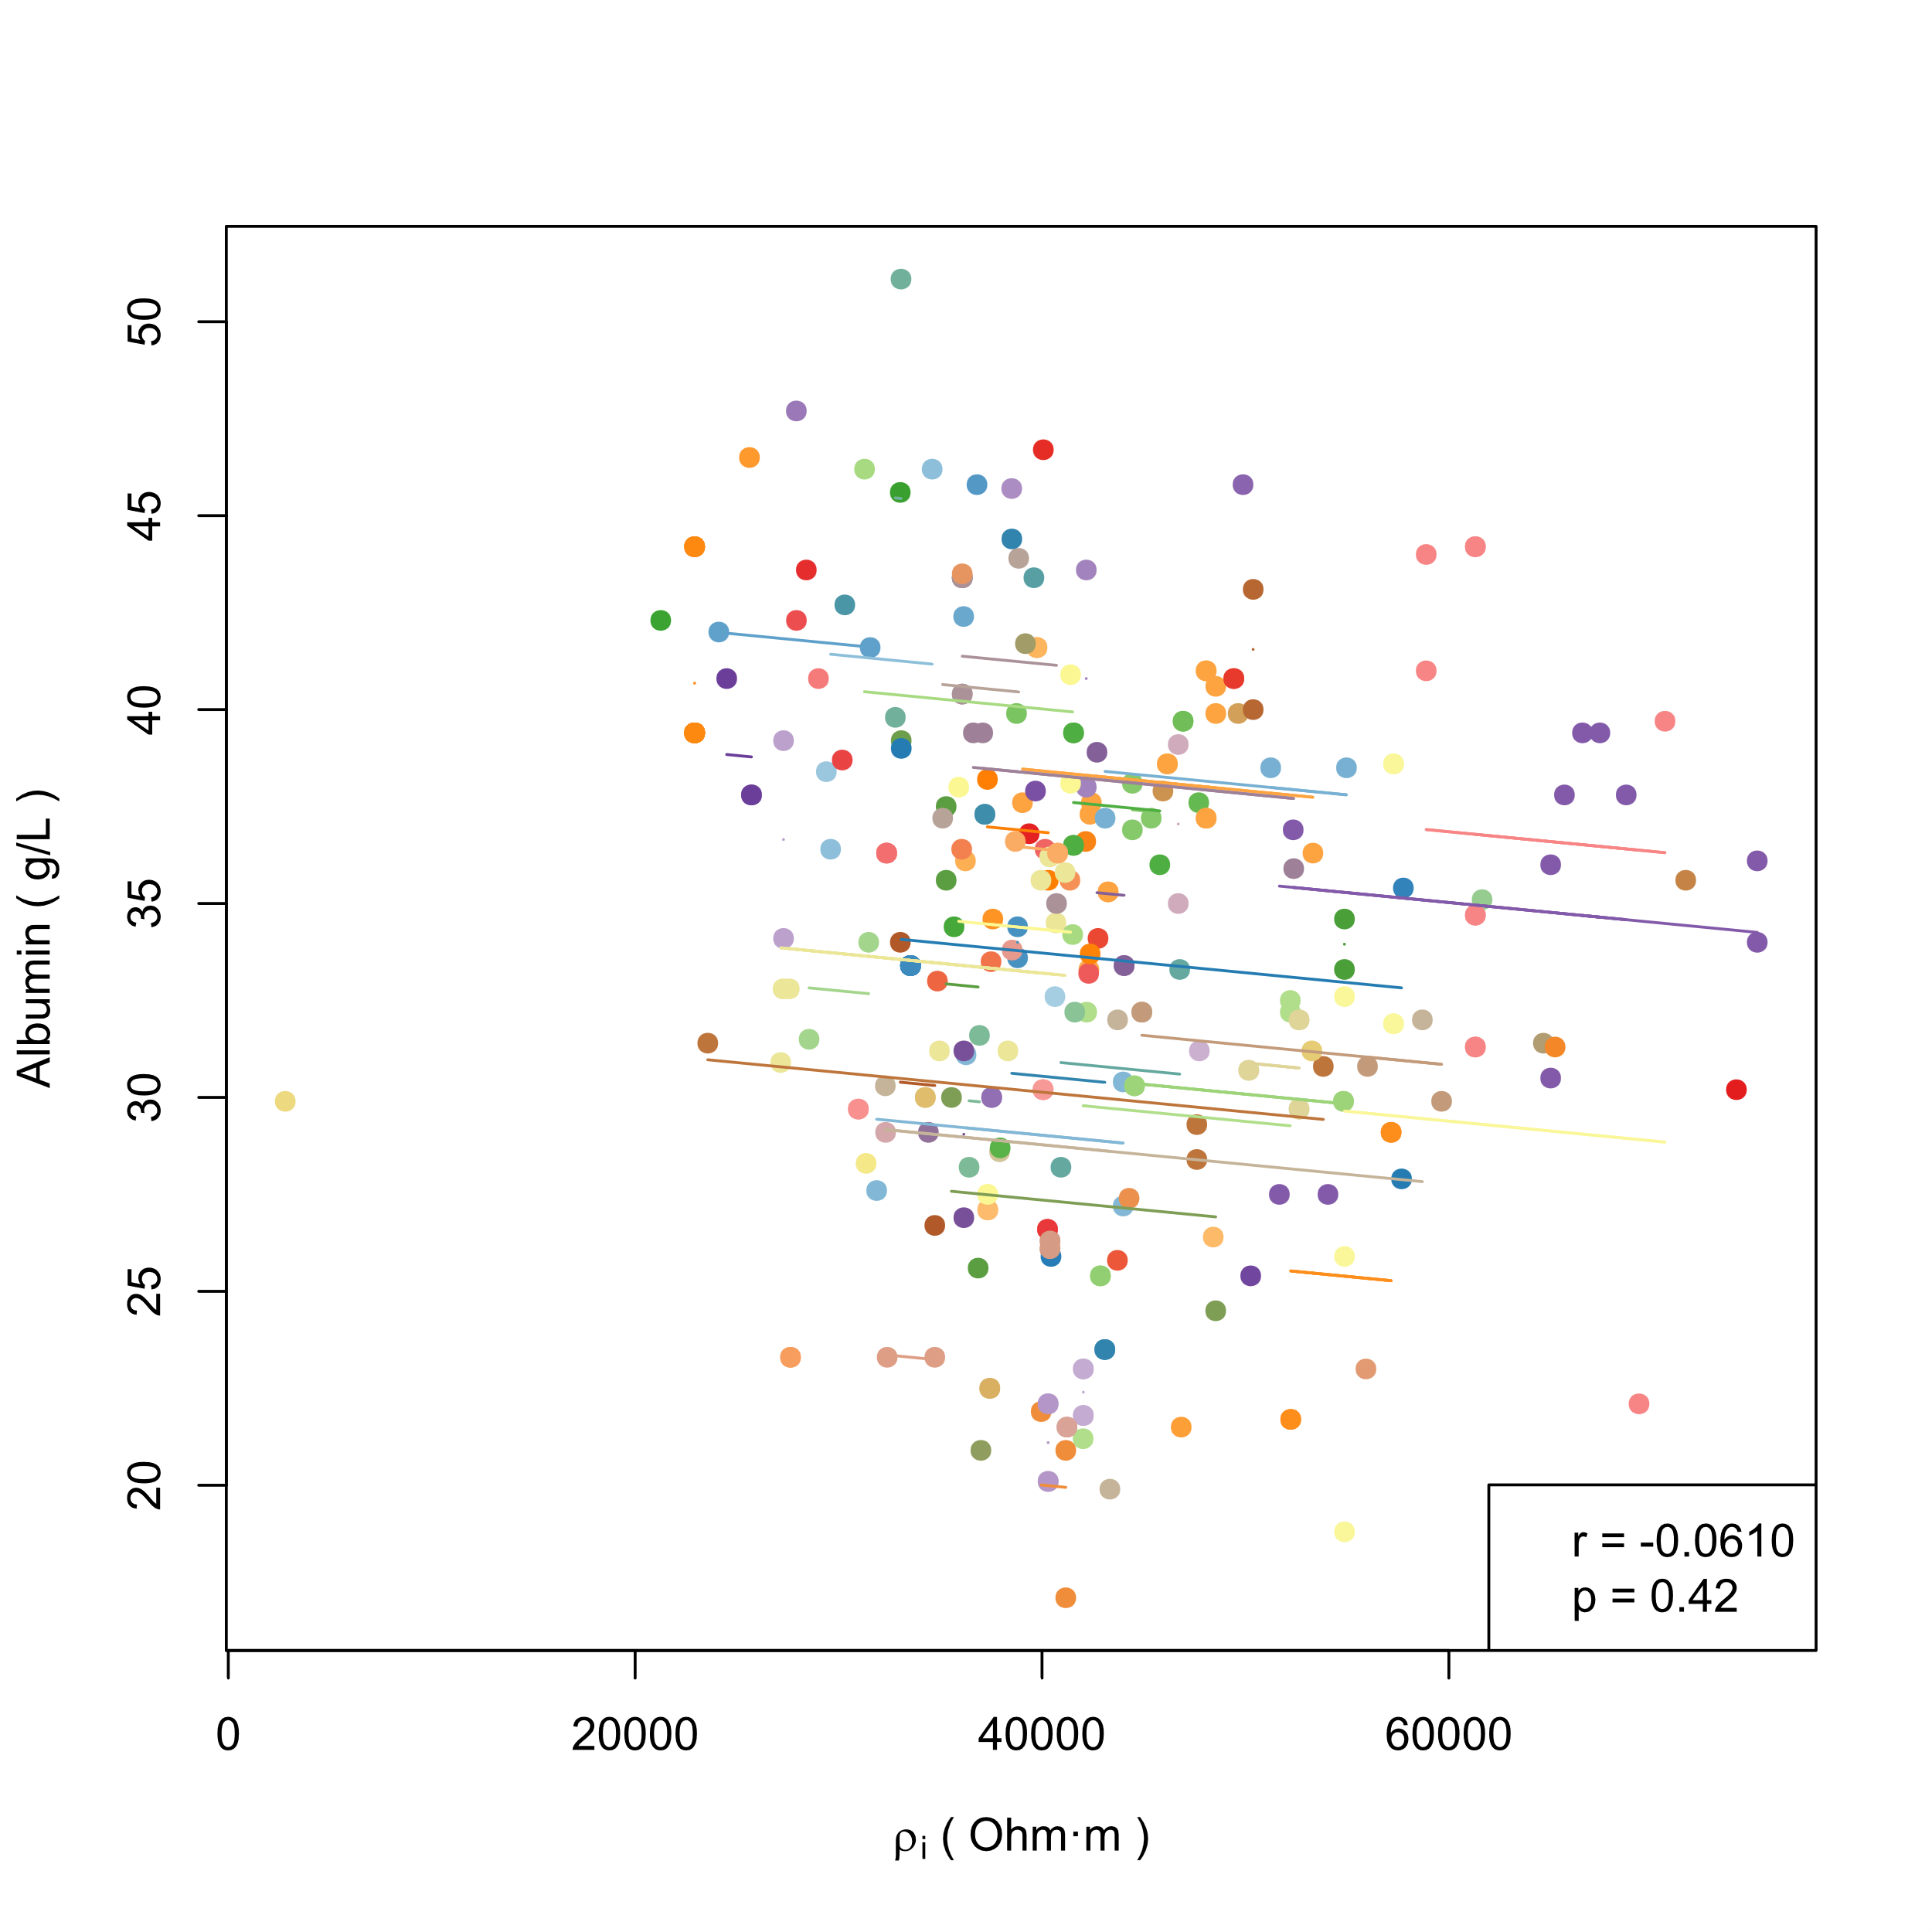  **(e)** Alb and ρi | 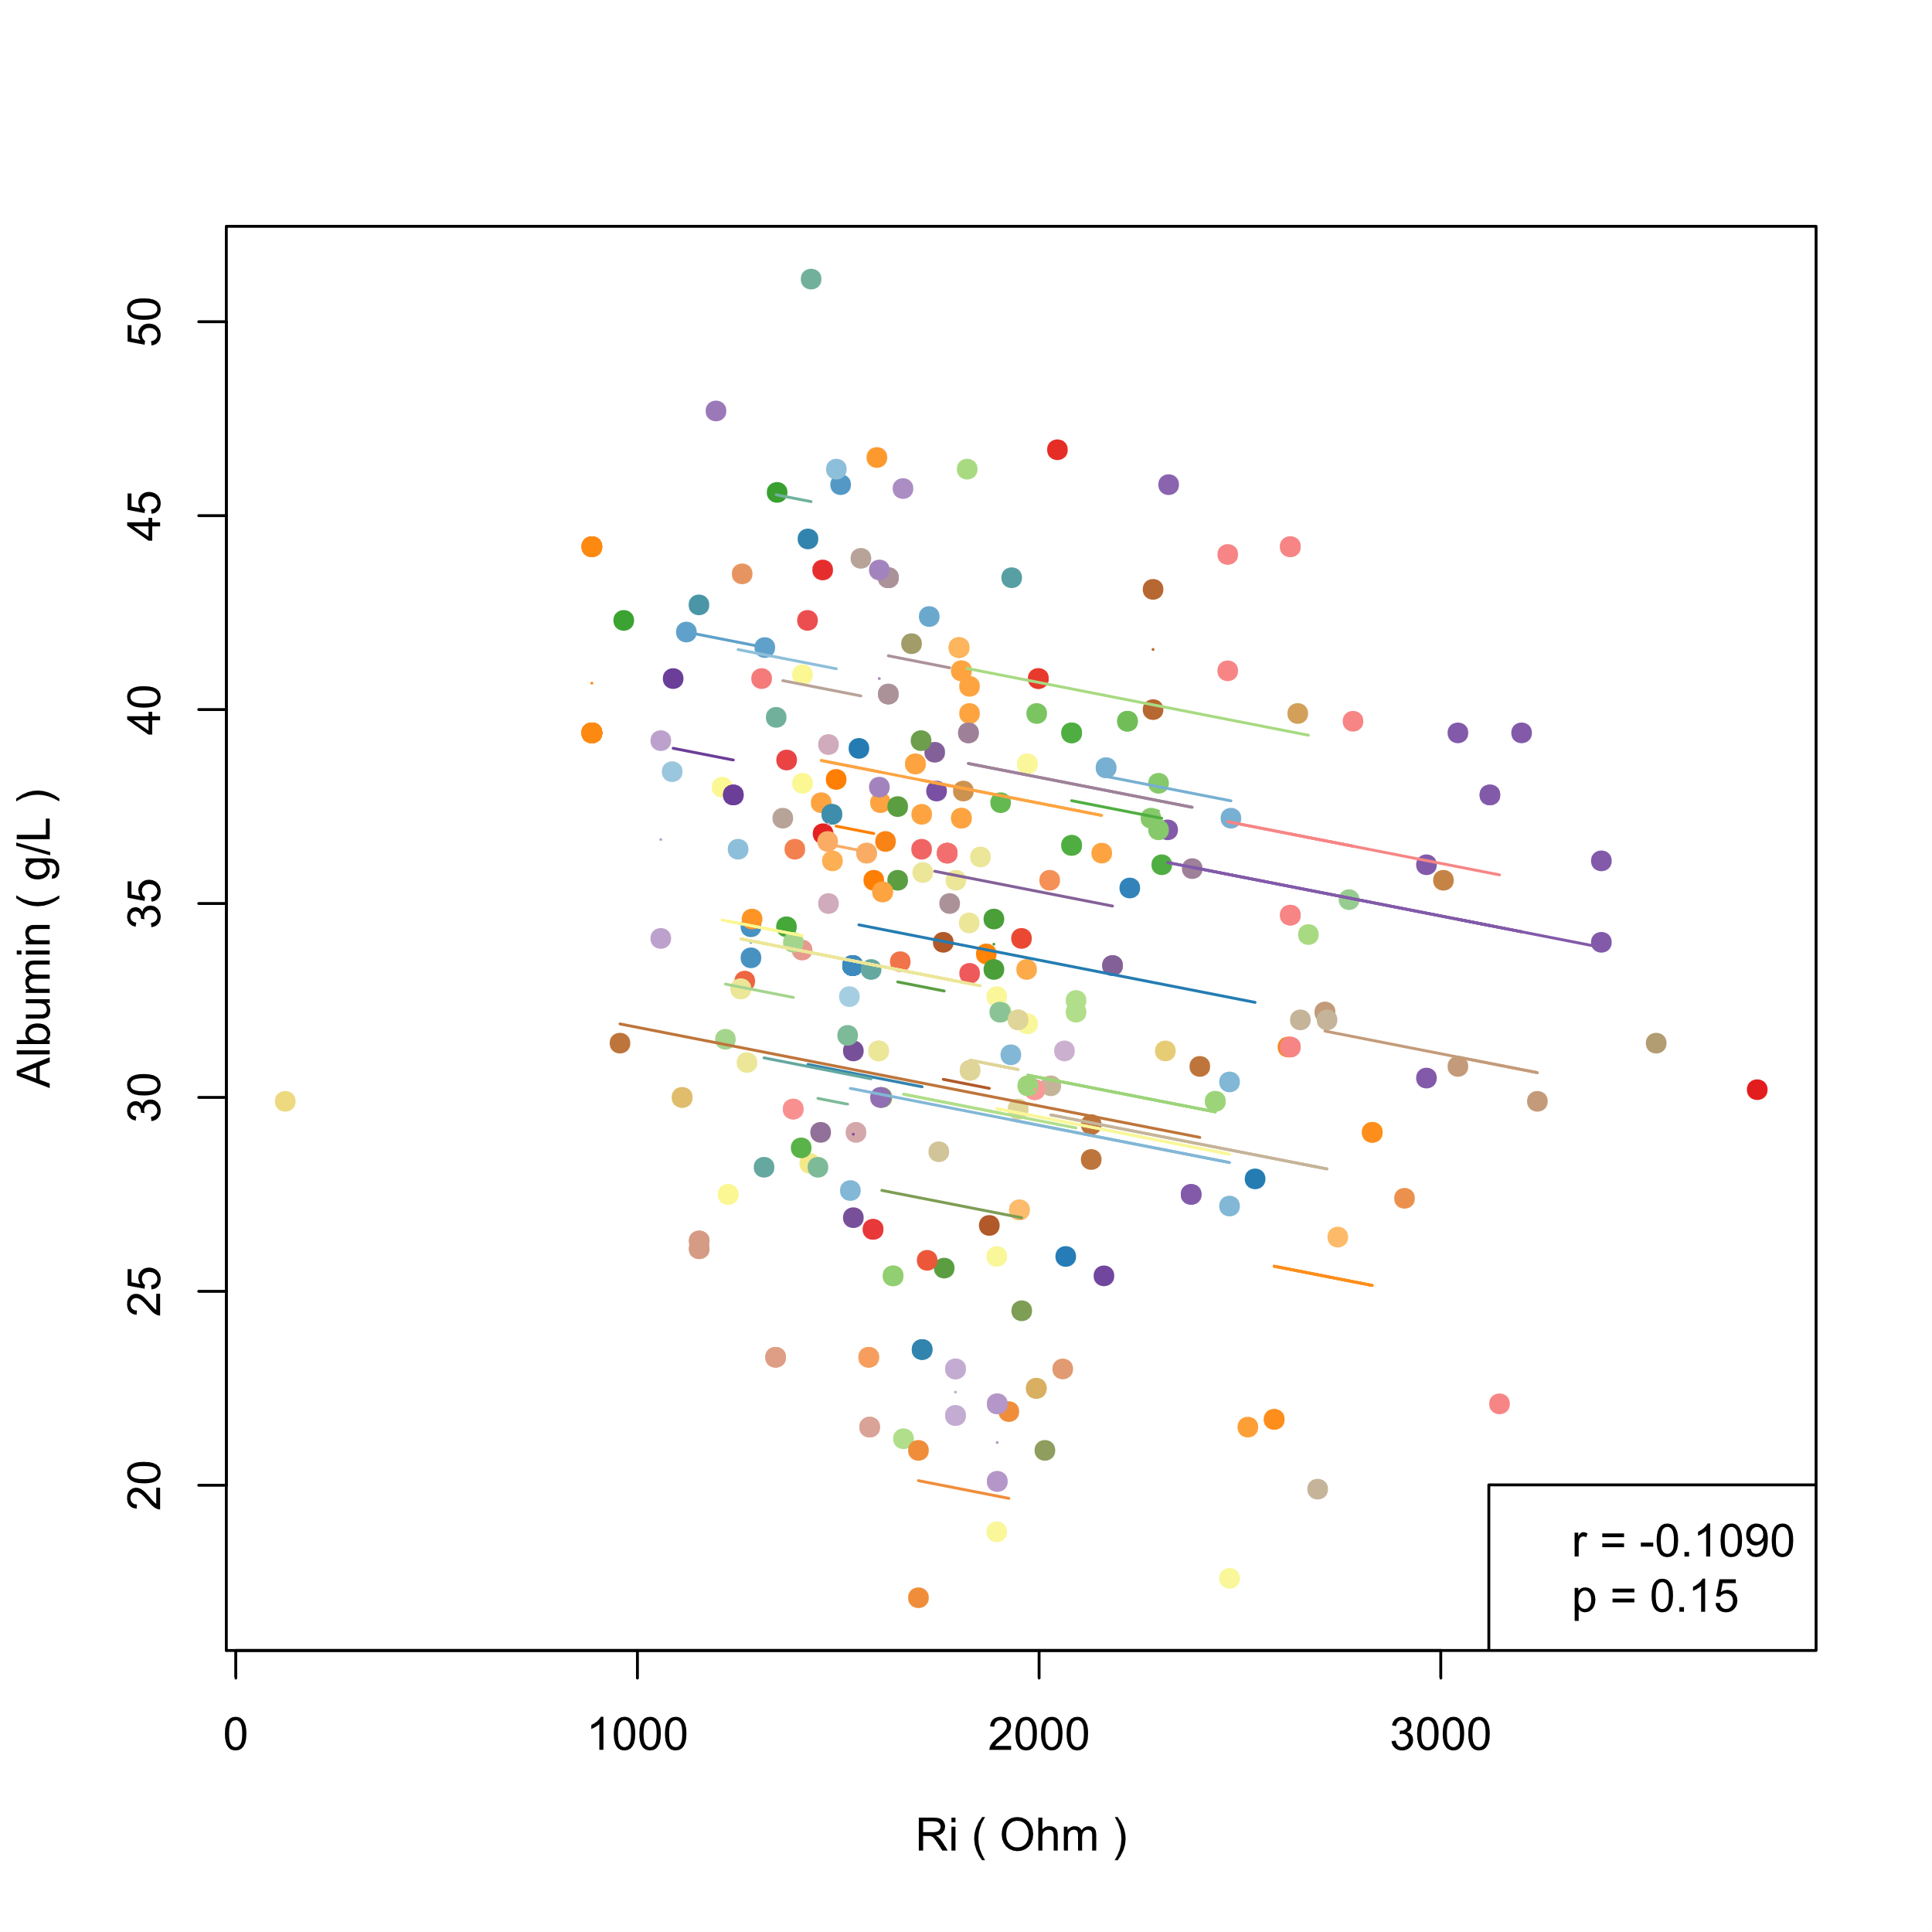  **(f)** Alb and Ri |

**Figure S1. (a-f) Intra-individual correlations between albumin (Alb) and bioelectrical indices in men (each color represents a patient, different points in each color represent samples of the patient measured at different times, line of the color represents the regression result of intra-individual correlation on the samples of this patient. r and p in the legend are the correlation coefficient and p value of hypothesis testing in repeated measures correlation)**

**< Figure S2>**

| 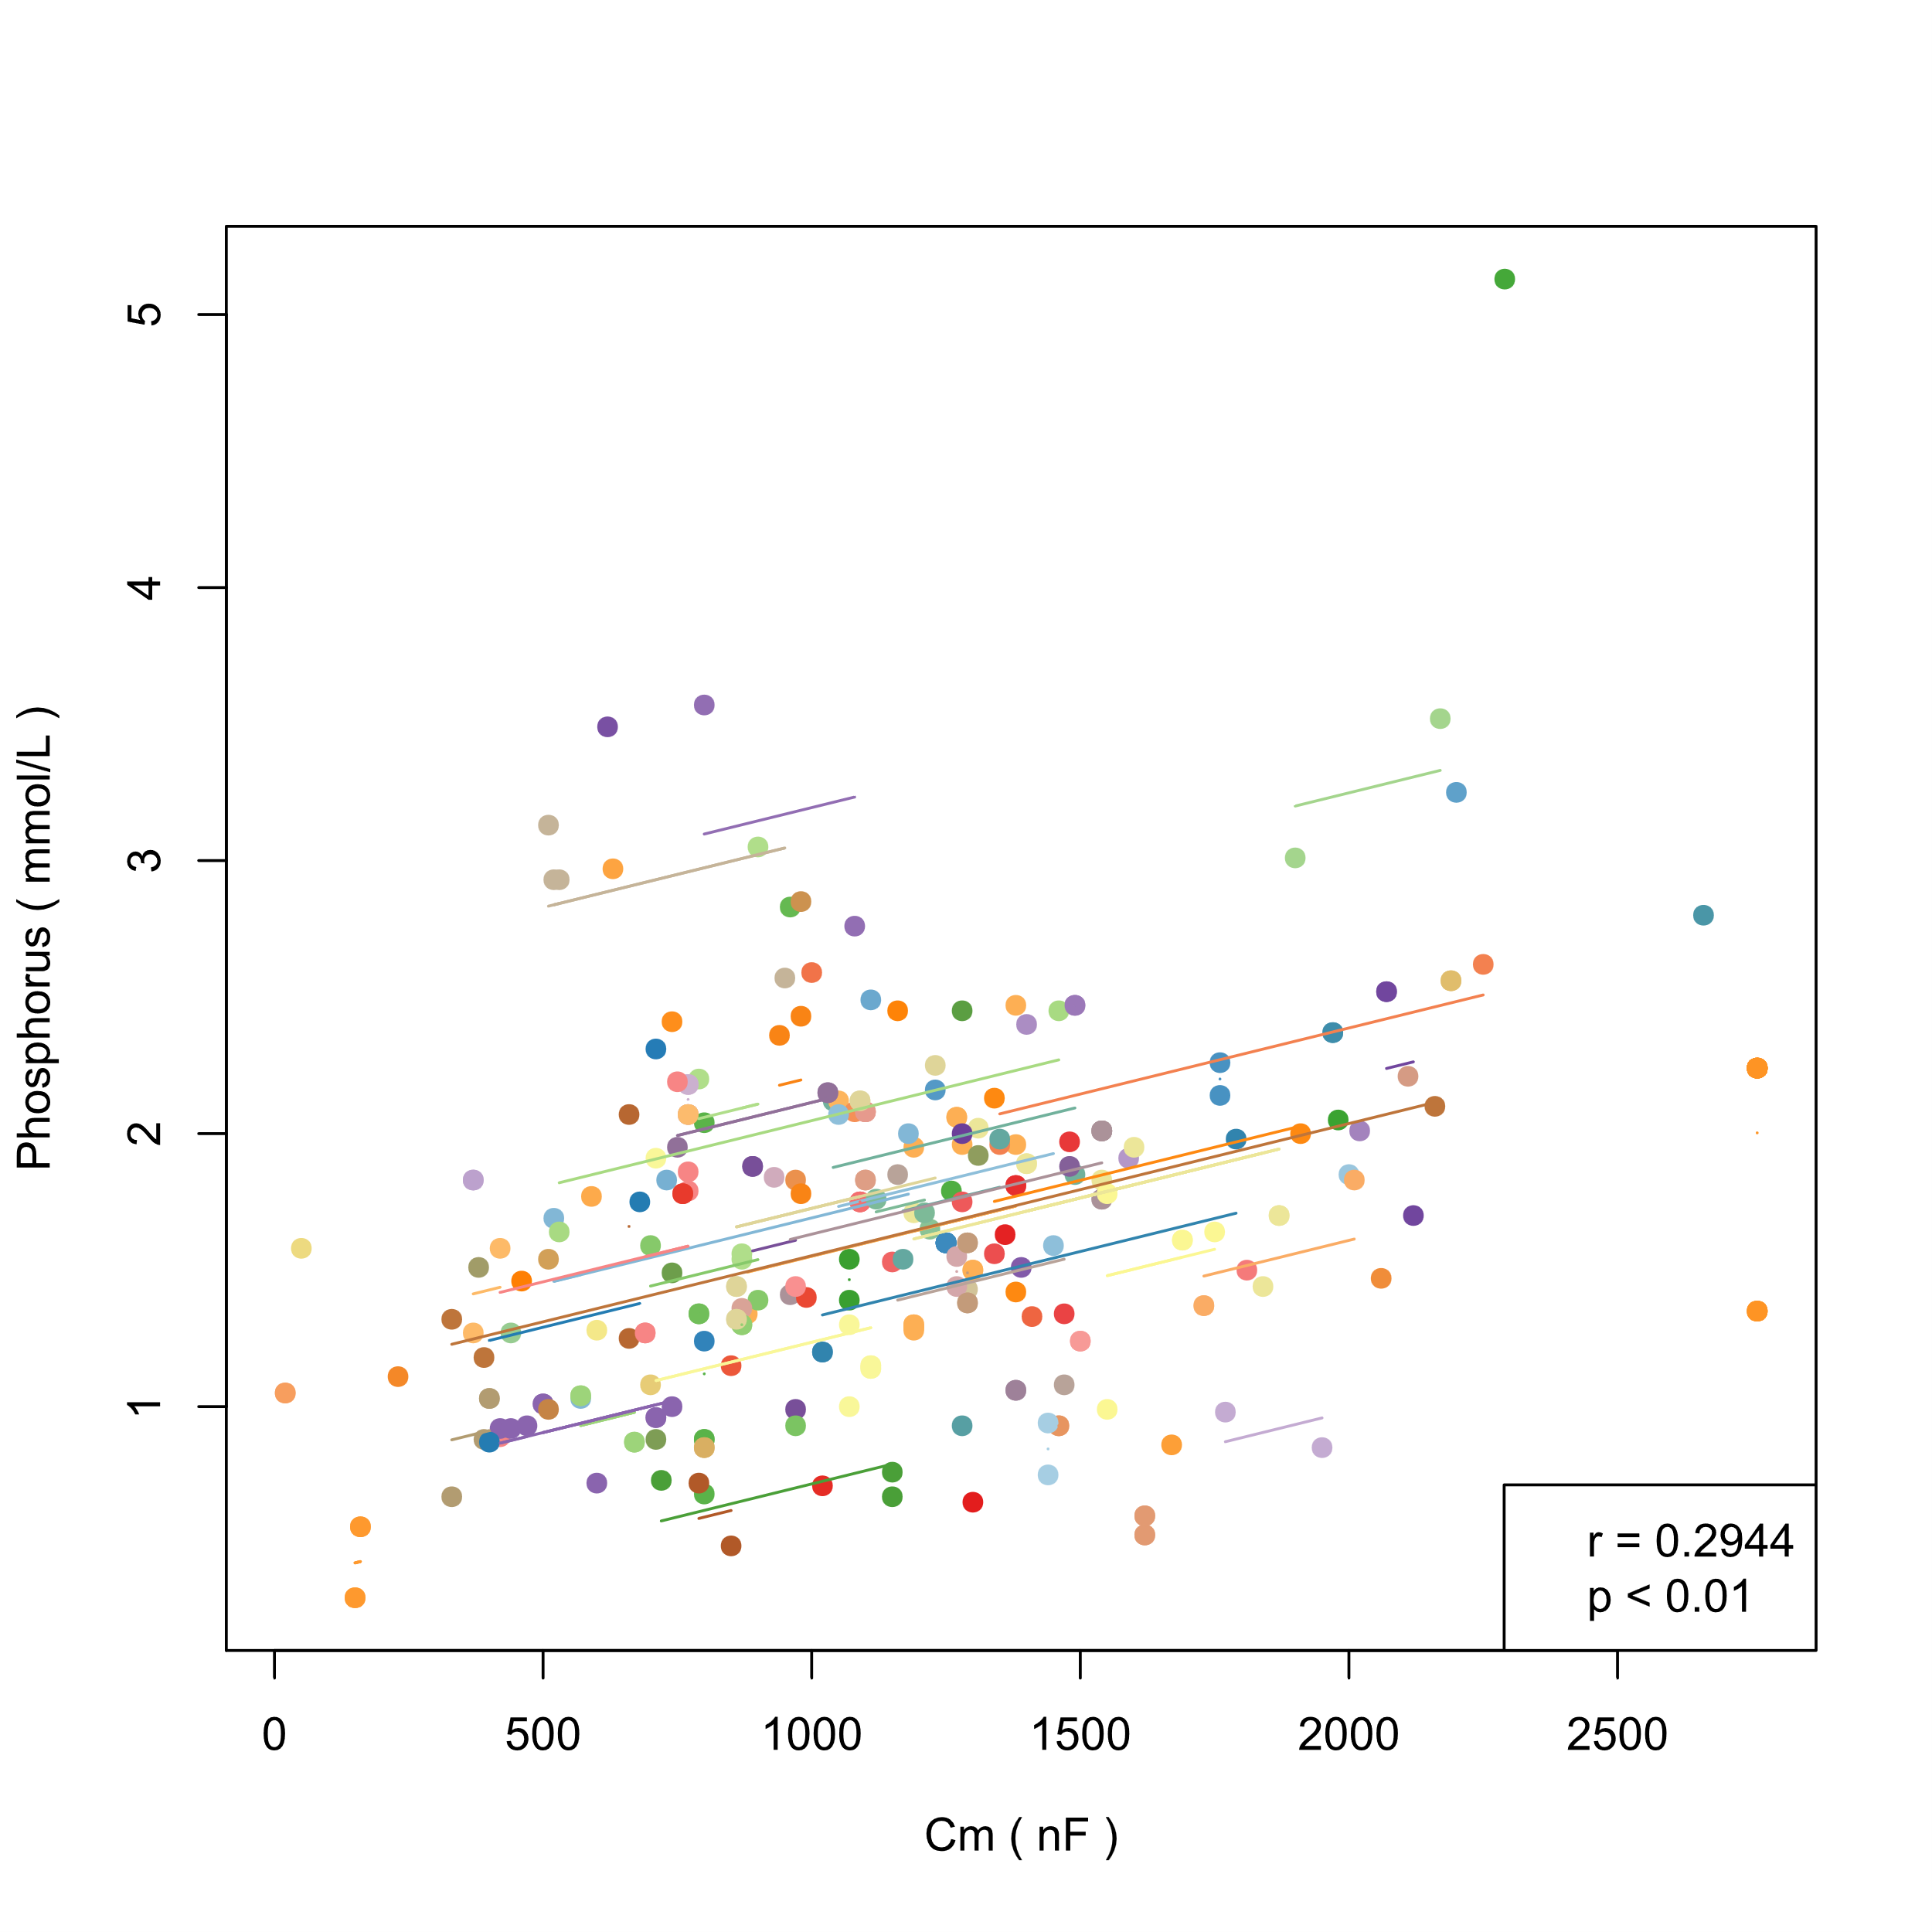**(a)** P and Cm | 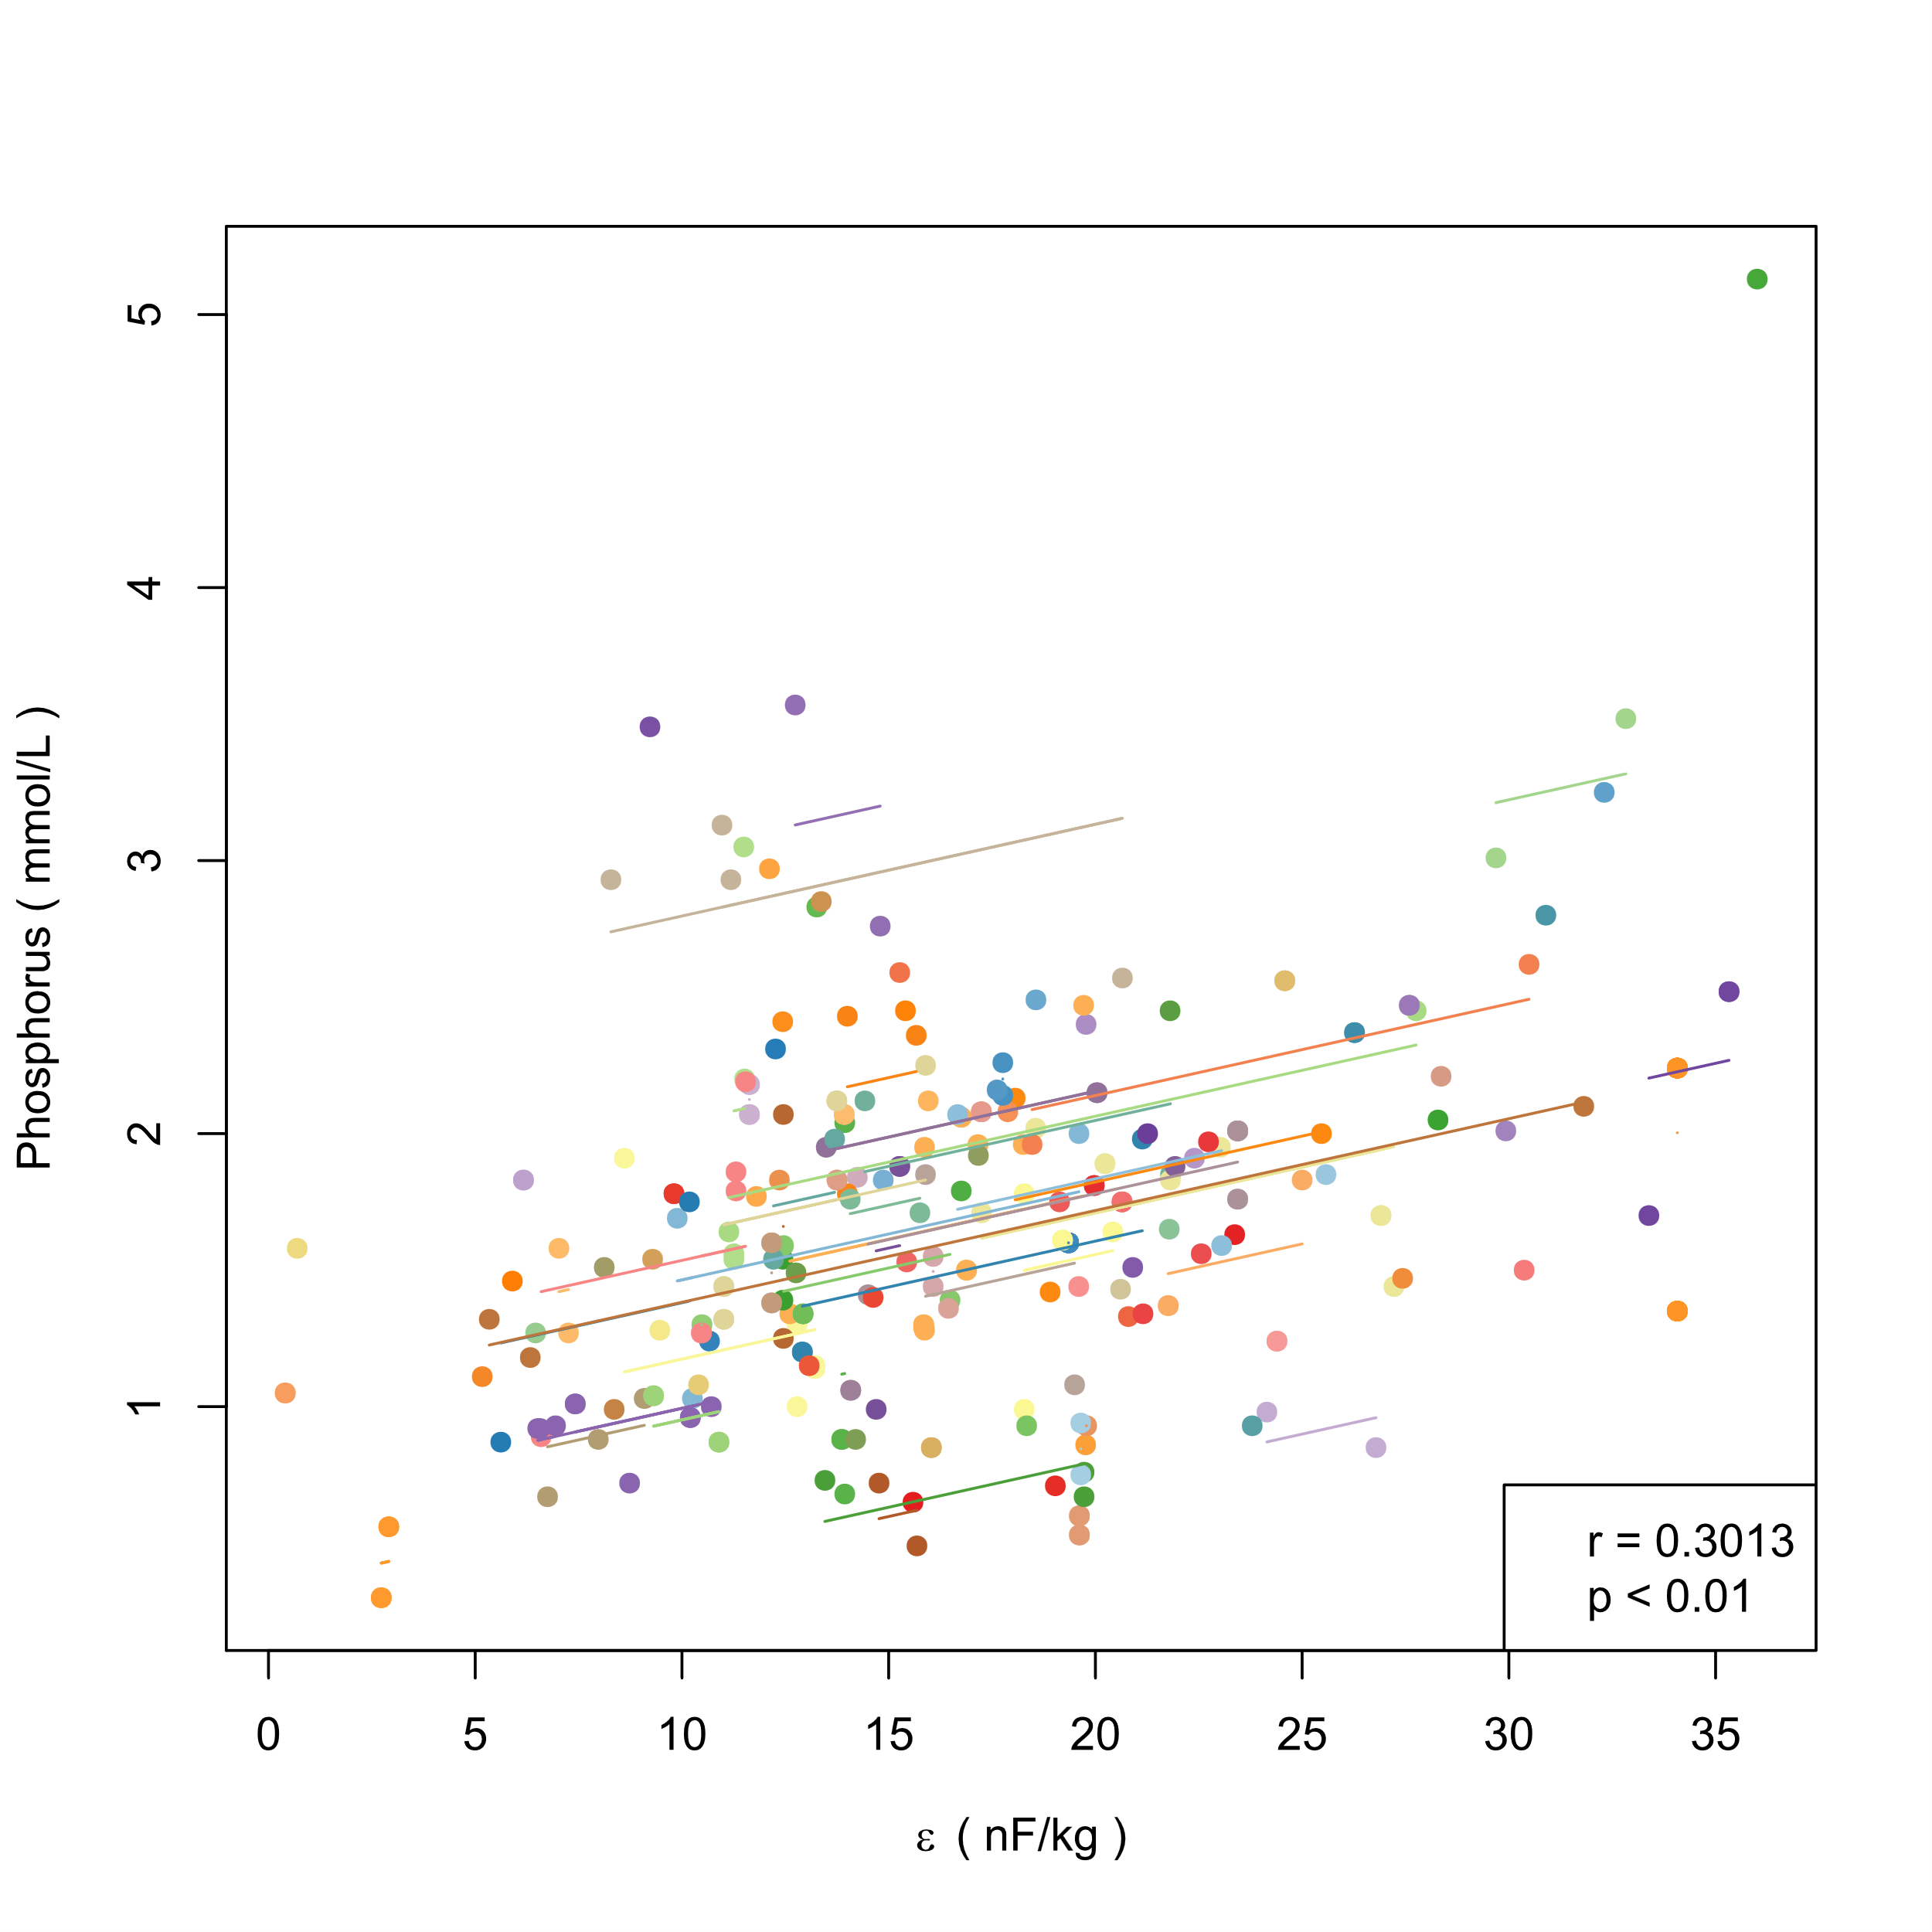**(b)** P and ε |
| --- | --- |
| 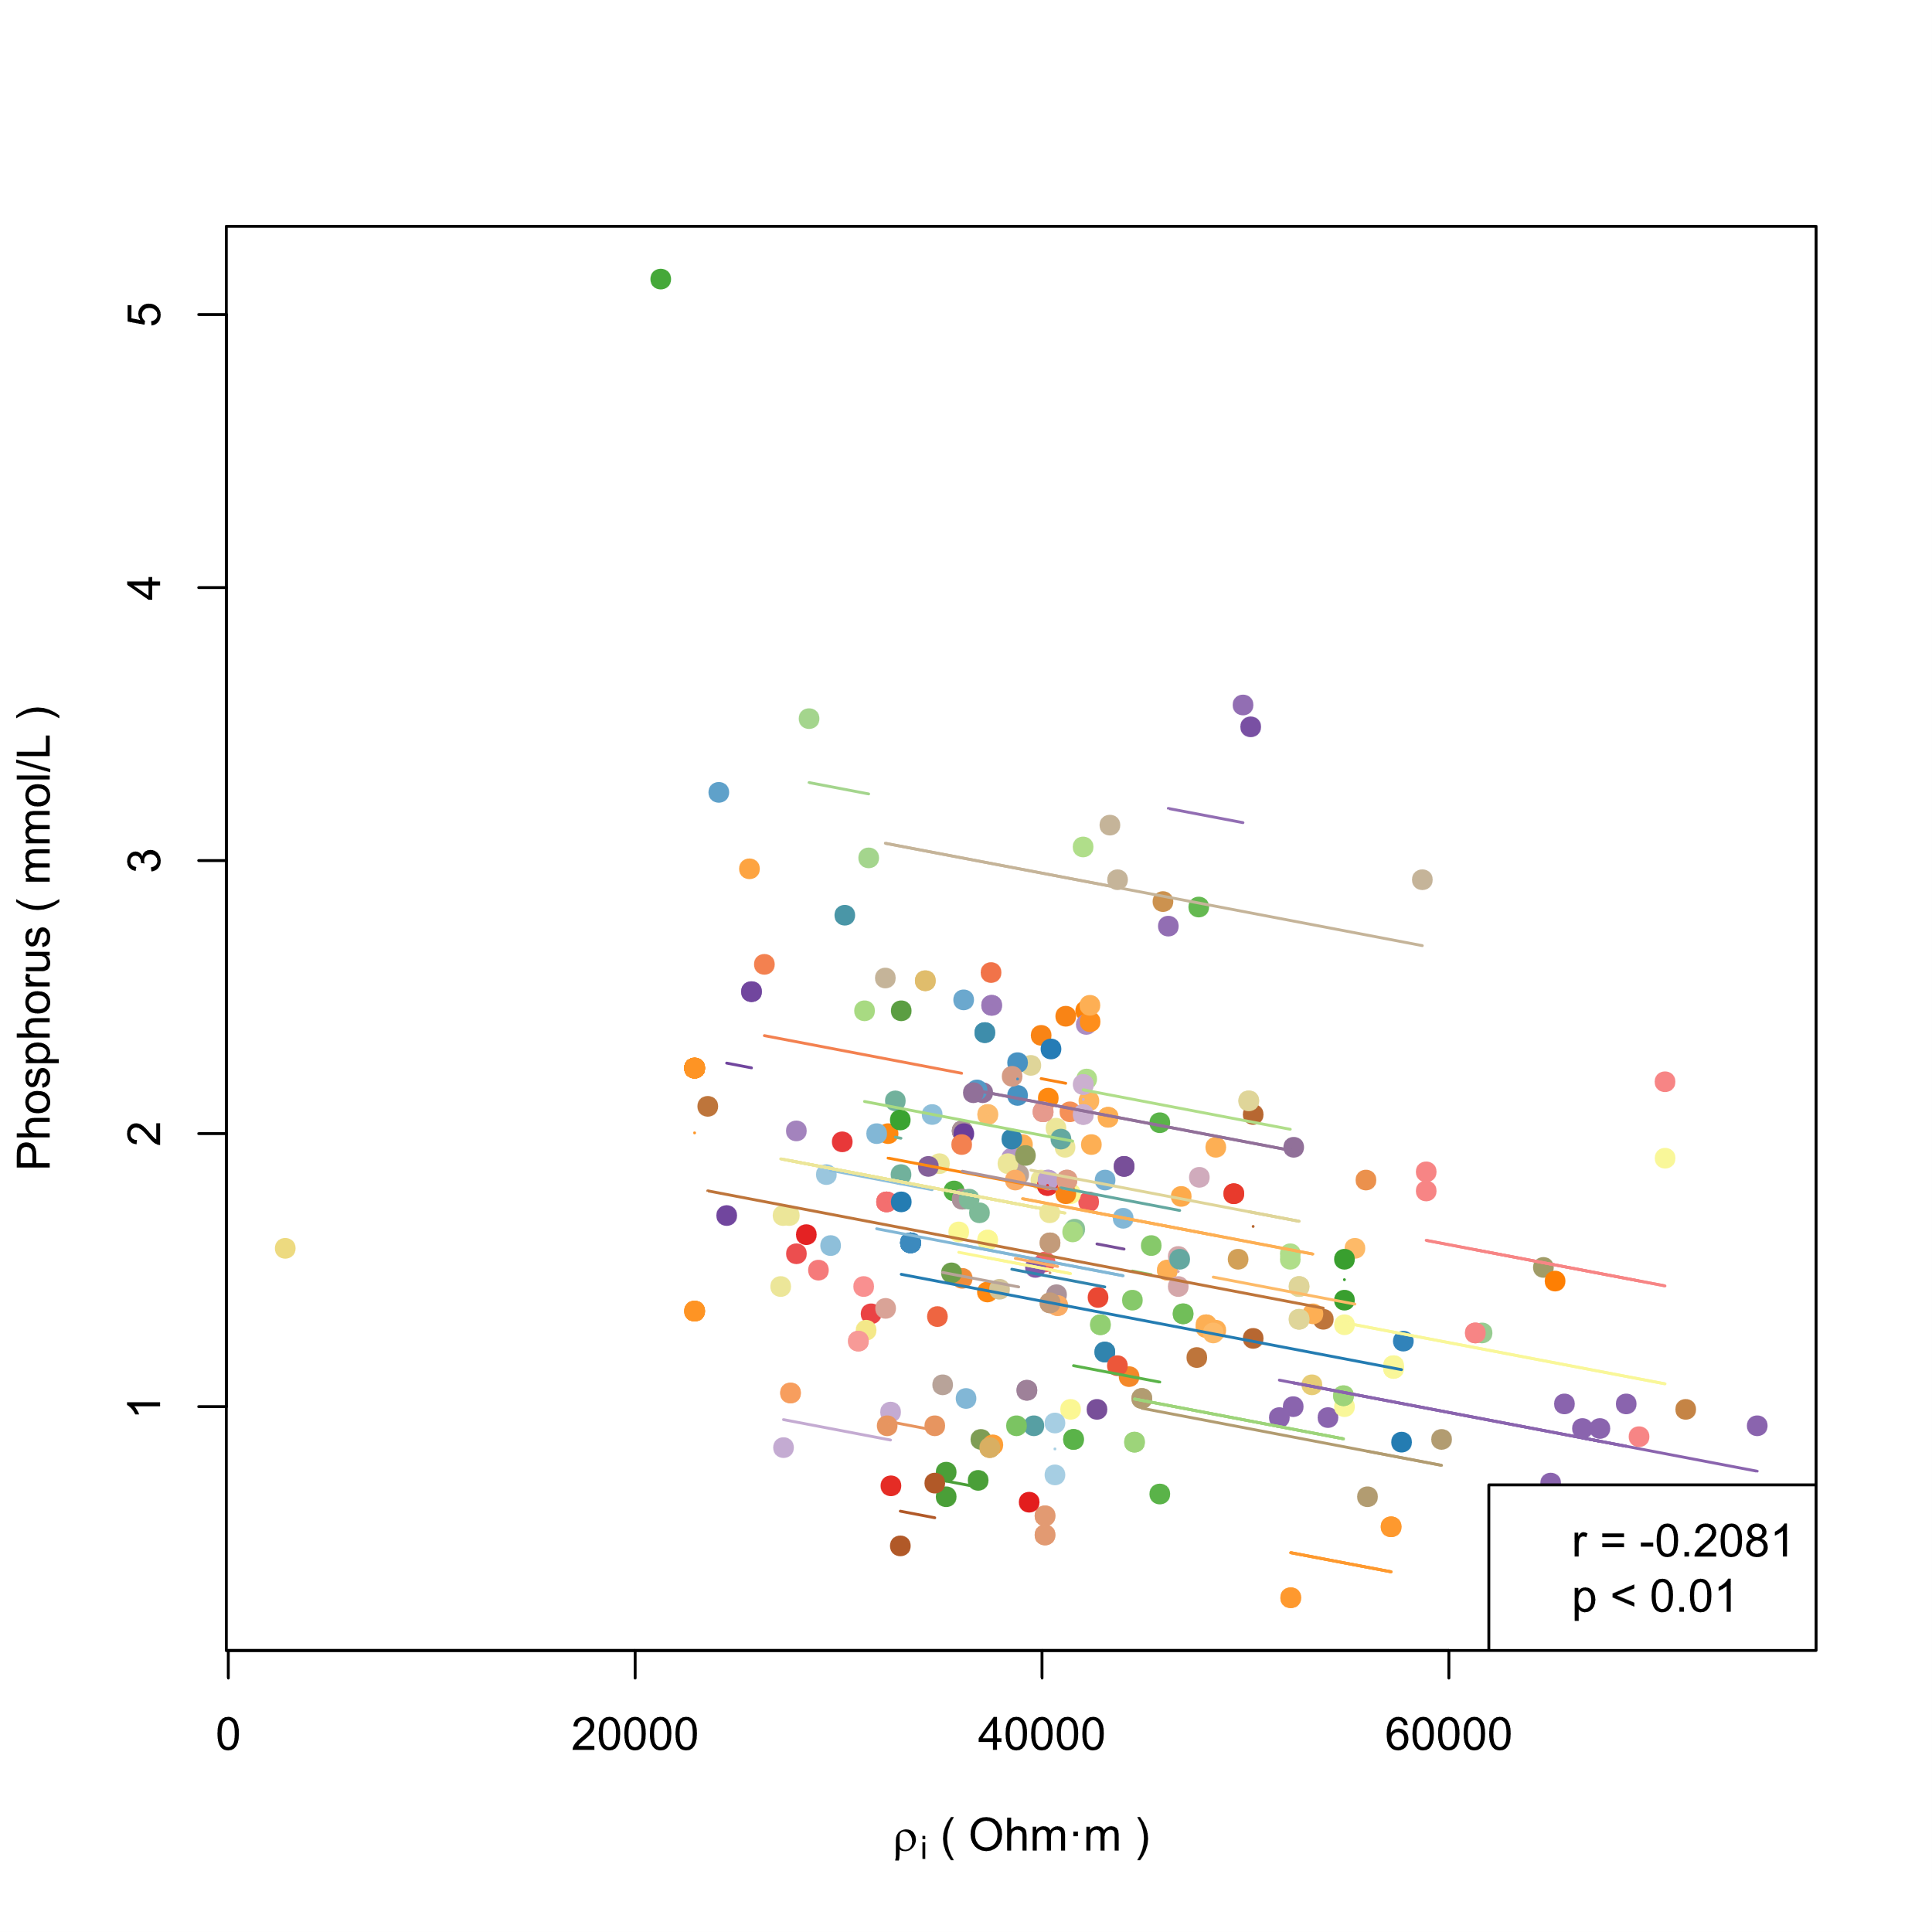**(c)** P and ρi | 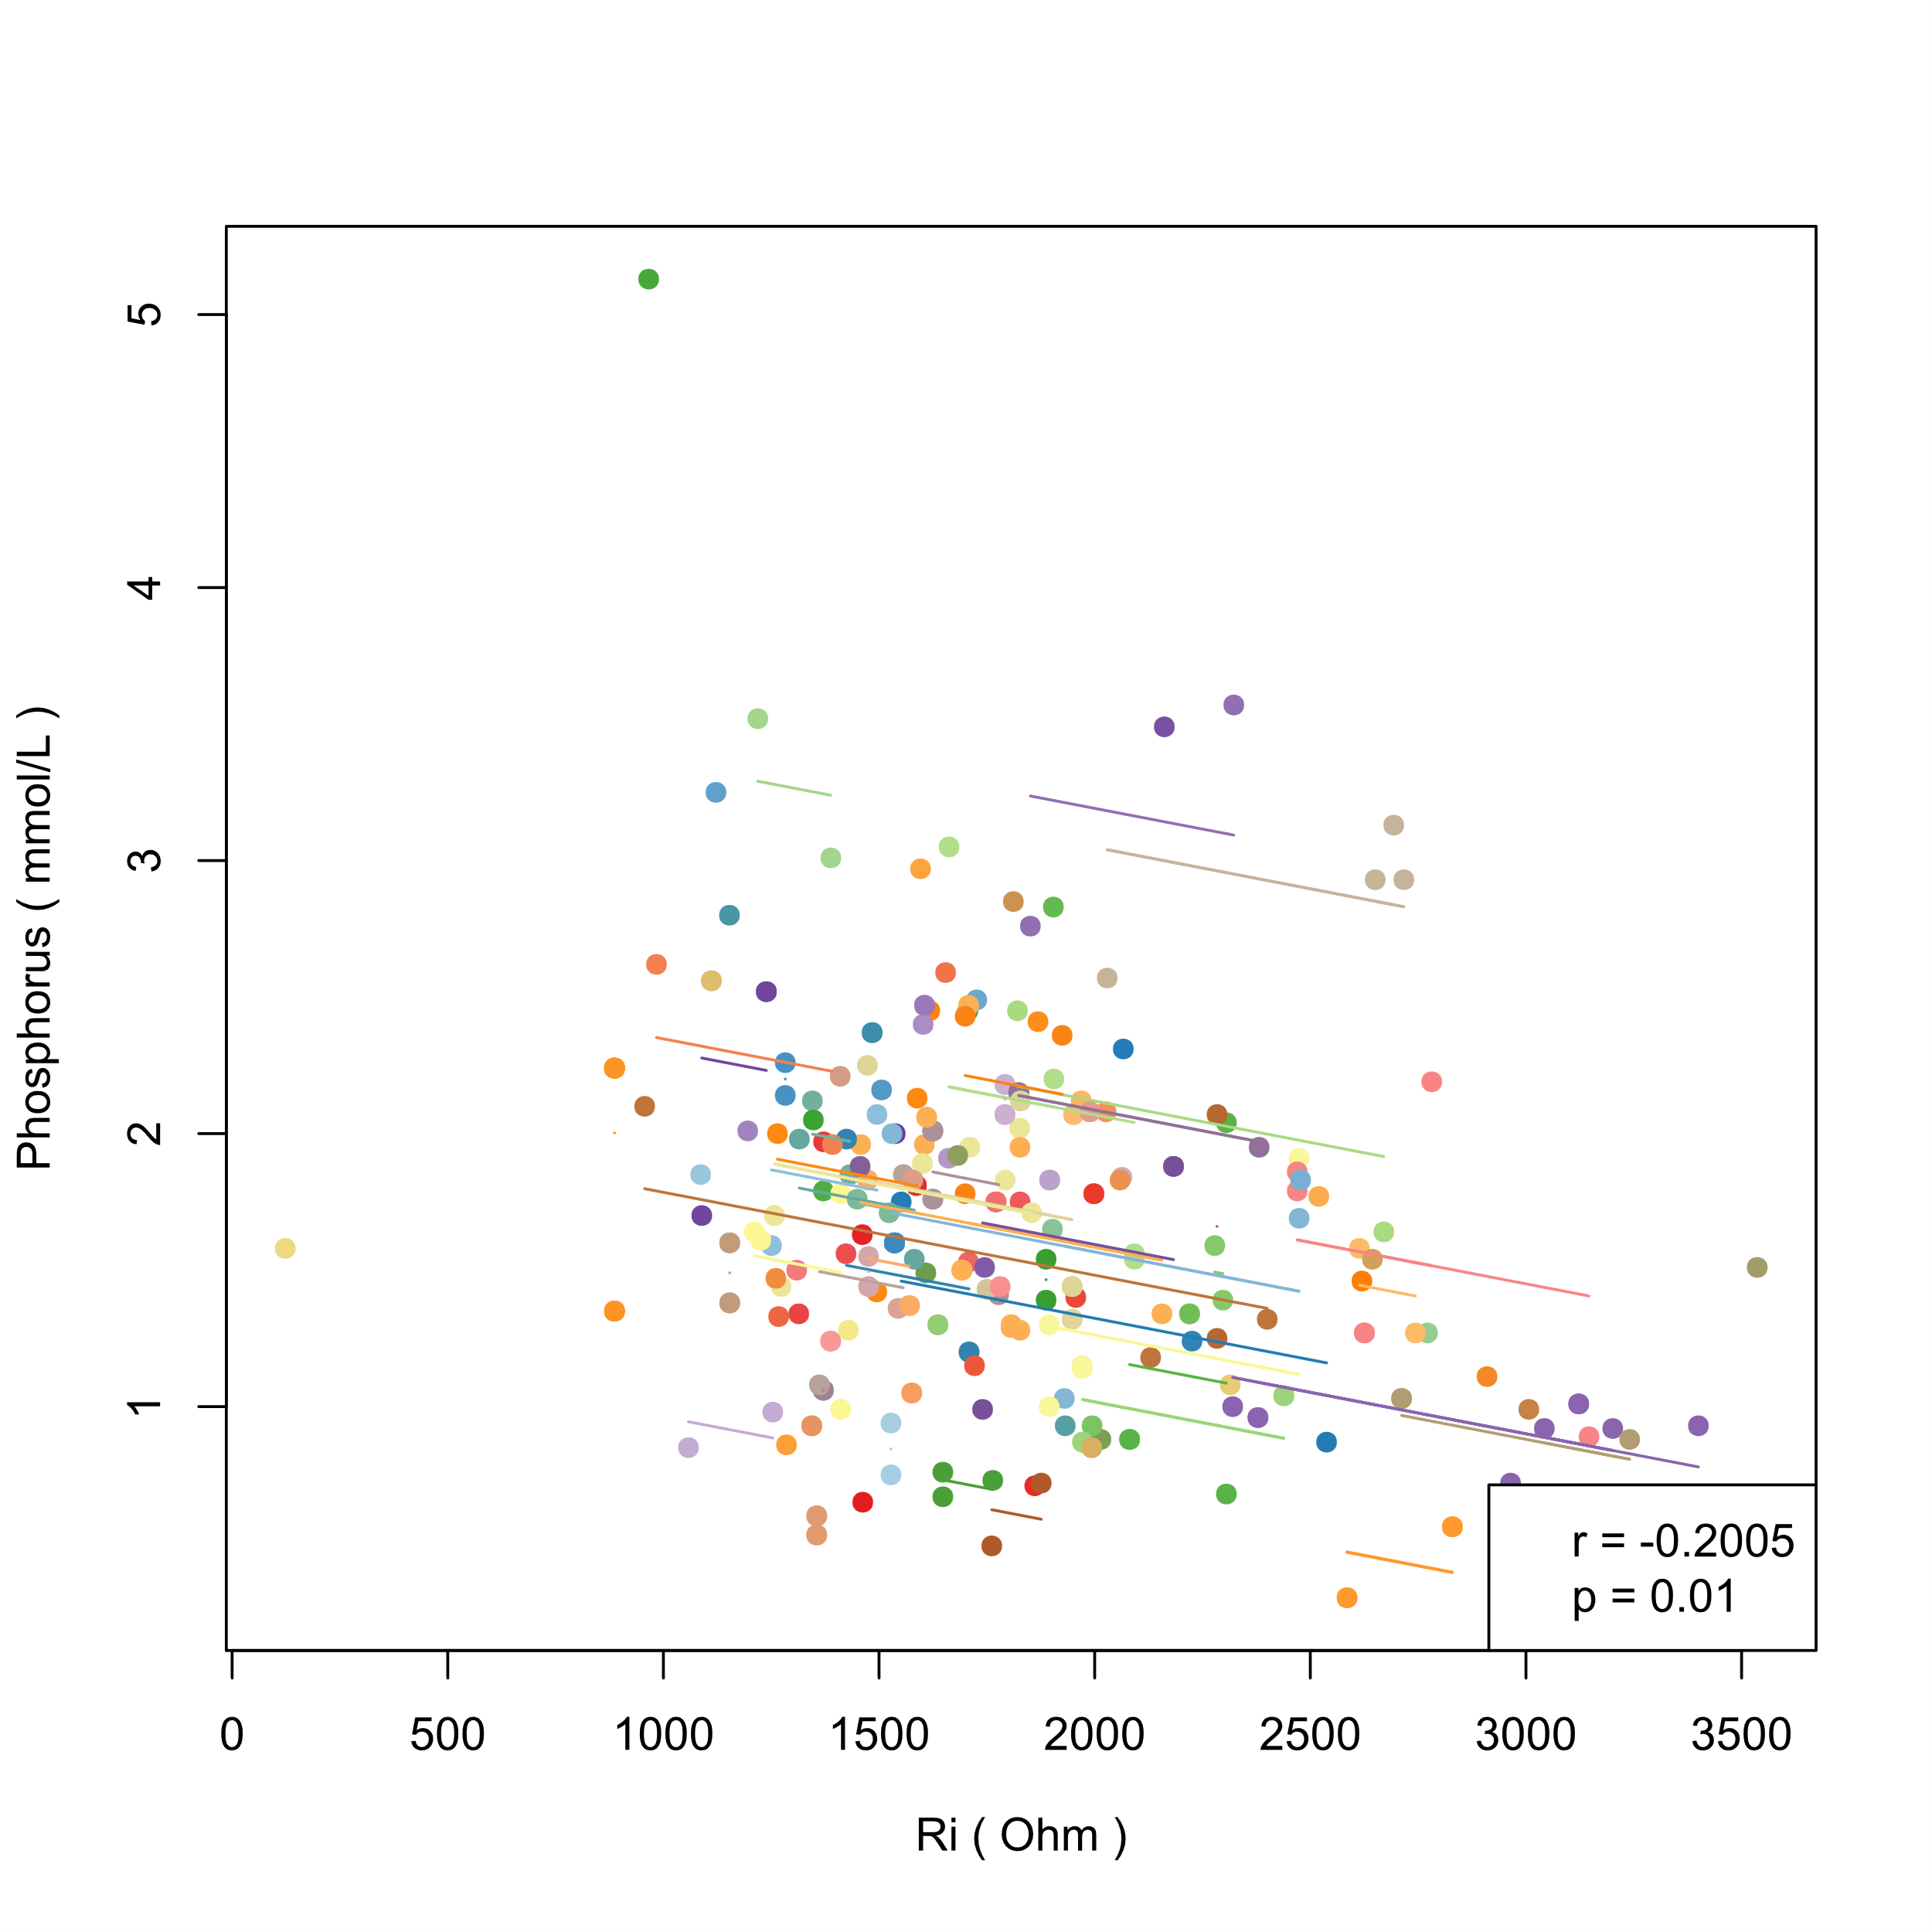**(d)** P and Ri |

**Figure S2. (a-d) Intra-individual correlations between phosphorus (P) and bioelectrical indices in men (each color represents a patient, different points in each color represent samples of the patient measured at different times, line of the color represent the regression result of intra-individual correlation on the samples of this patient. r and p in the legend are the correlation coefficient and p value of hypothesis testing in repeated measures correlation)**

**< Figure S3>**

| 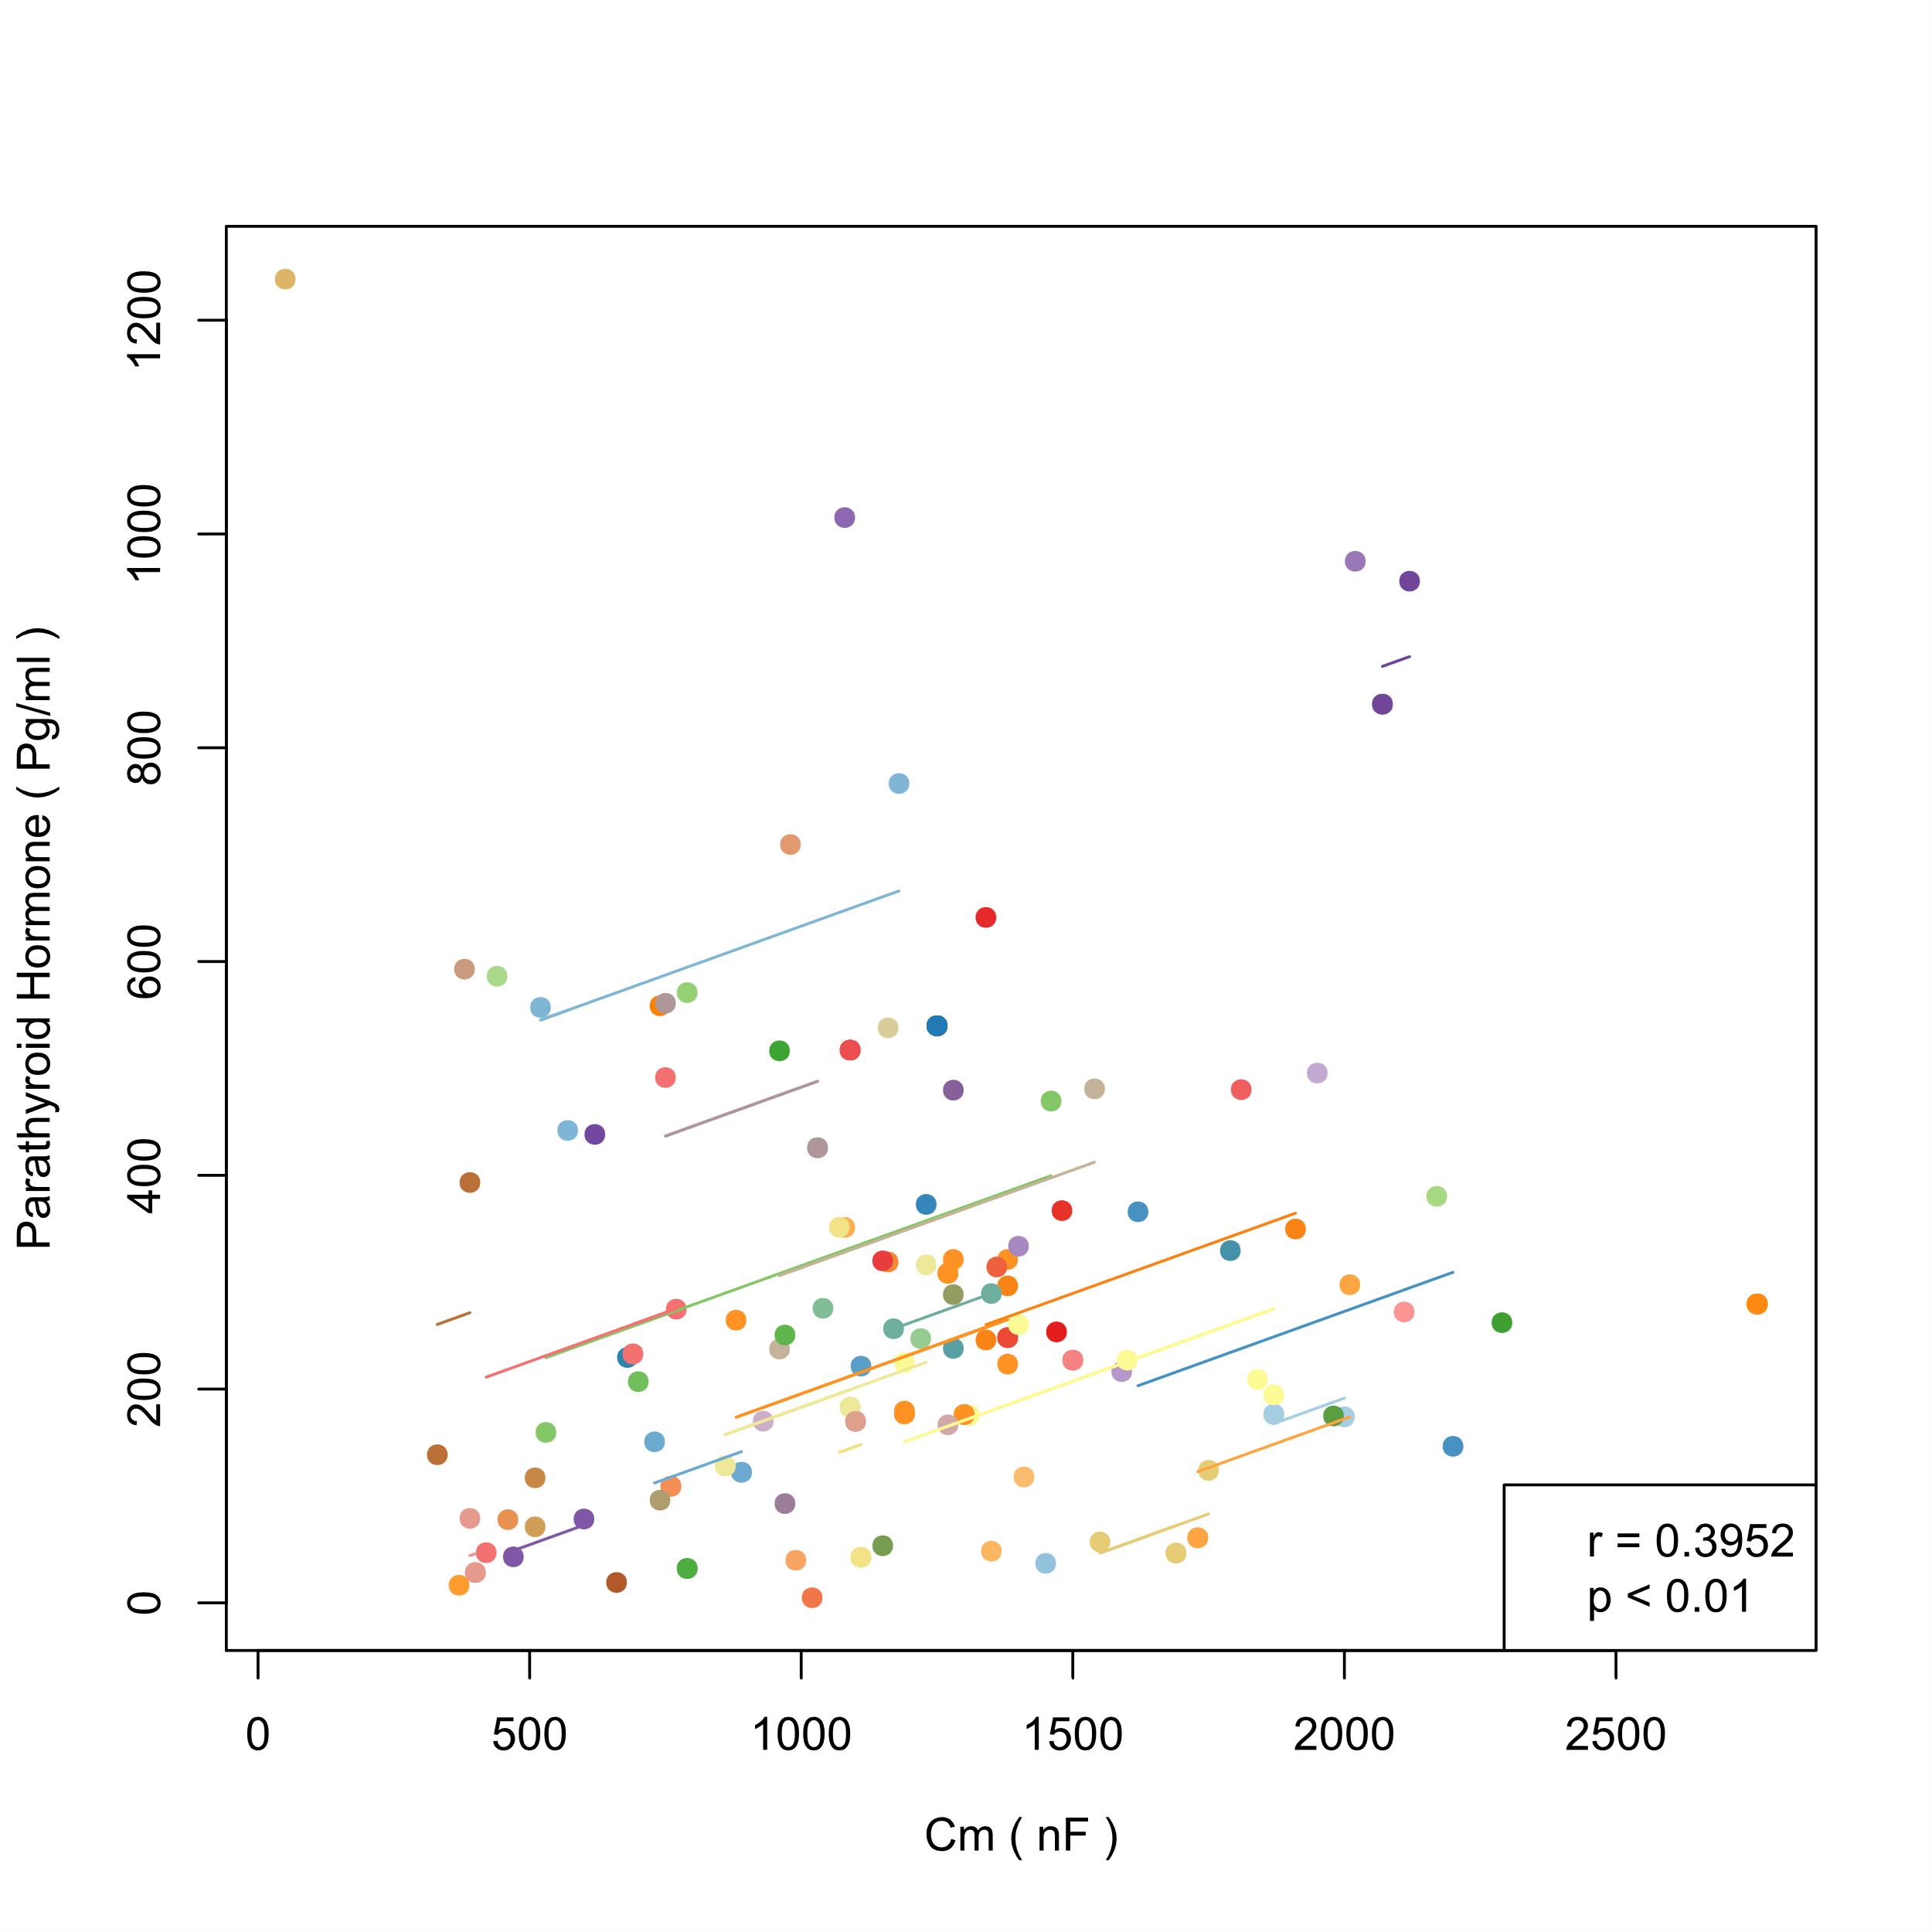 **(a)** PTH and Cm | 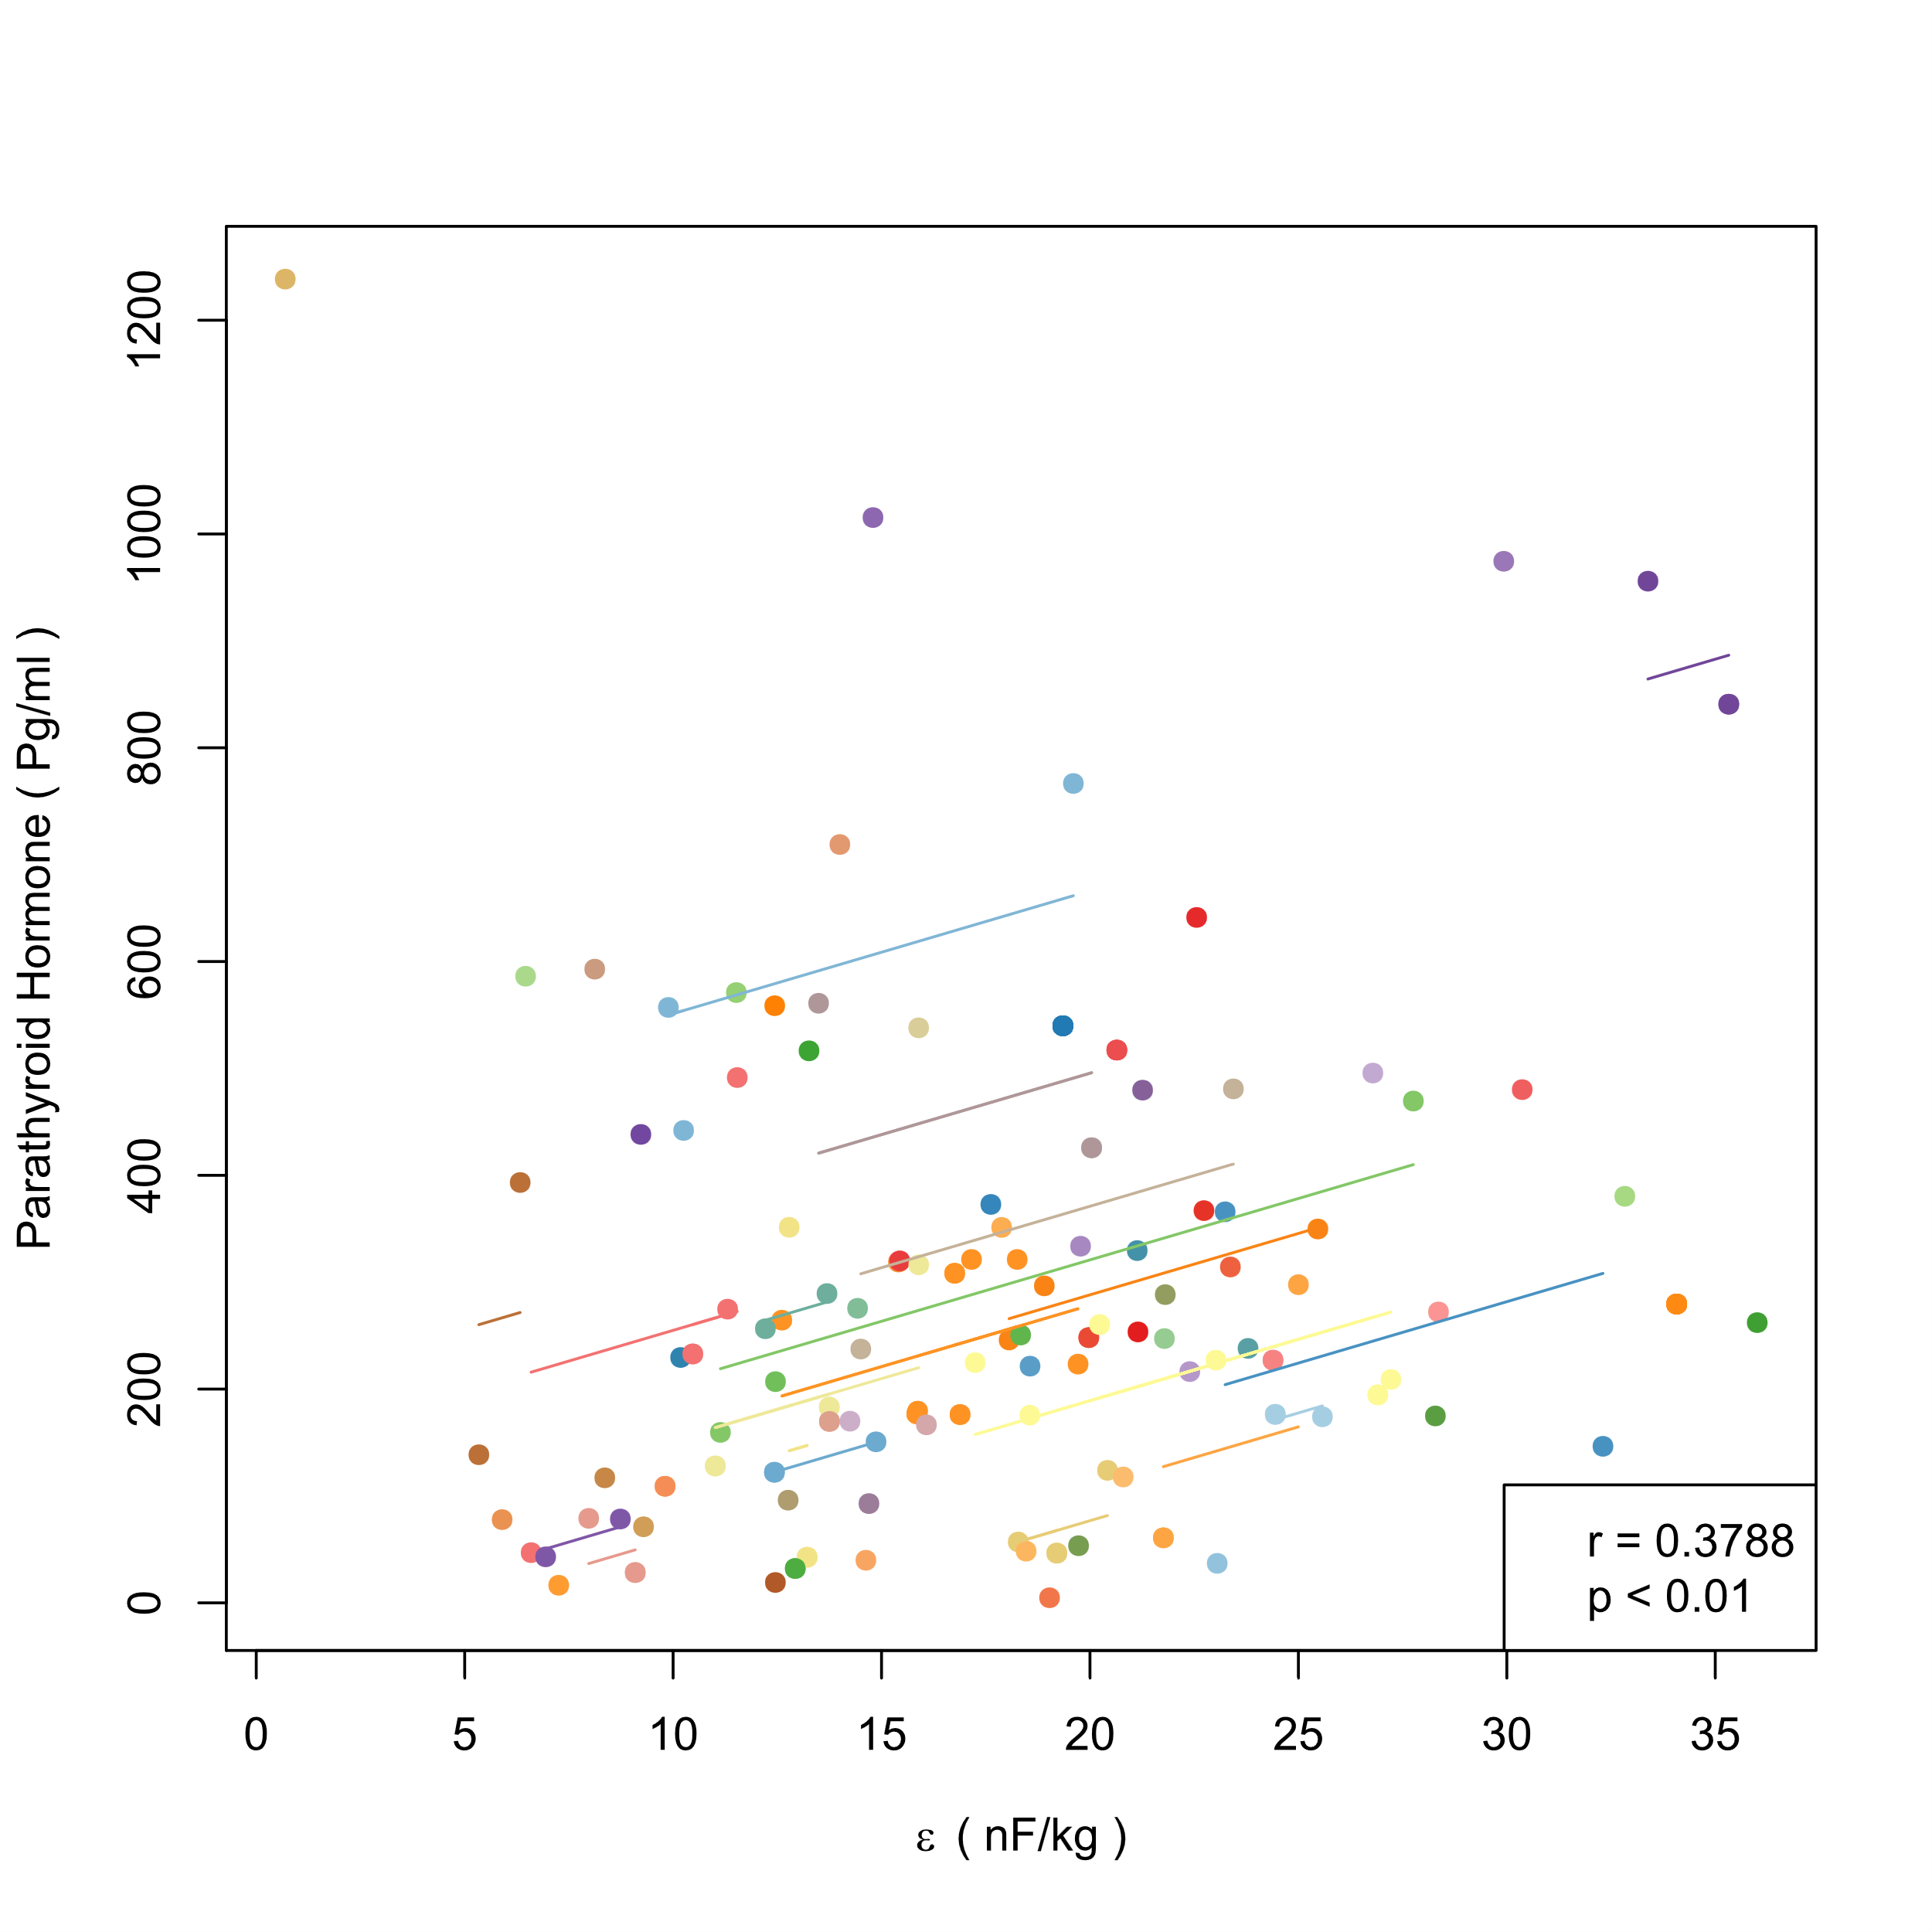 **(b)** PTH and ε |
| --- | --- |
| 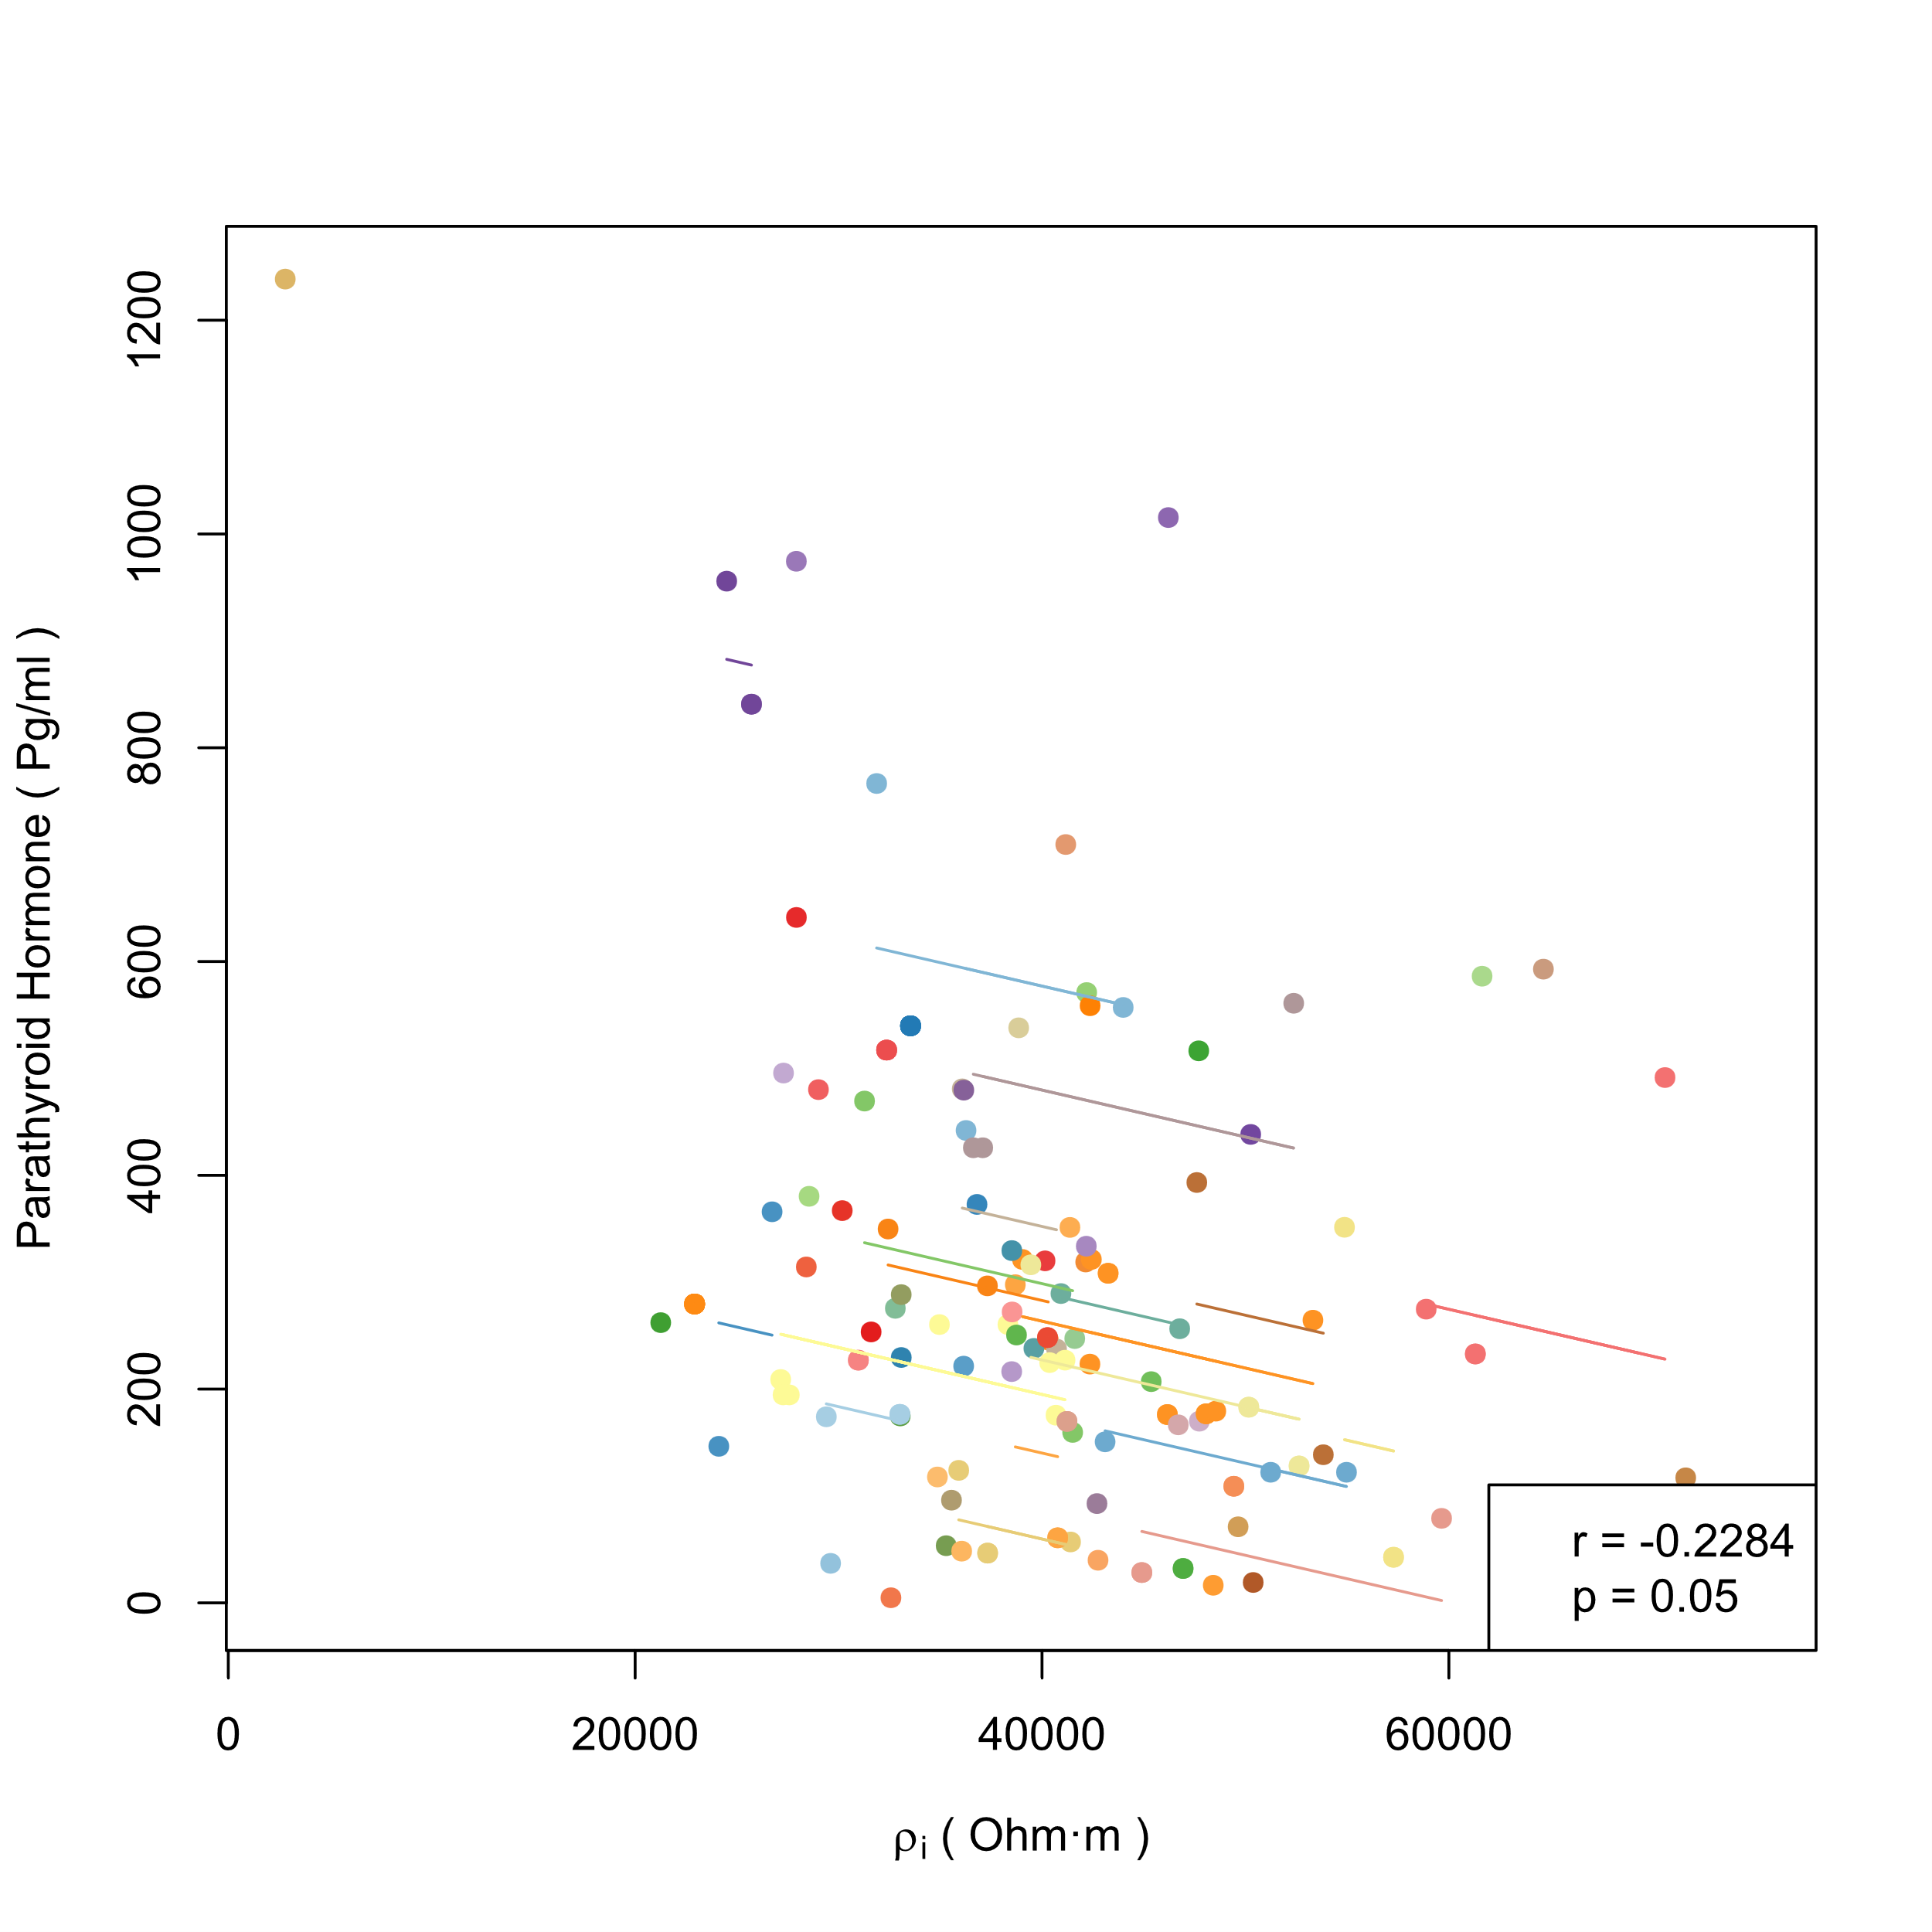 **(c)** PTH and ρi | 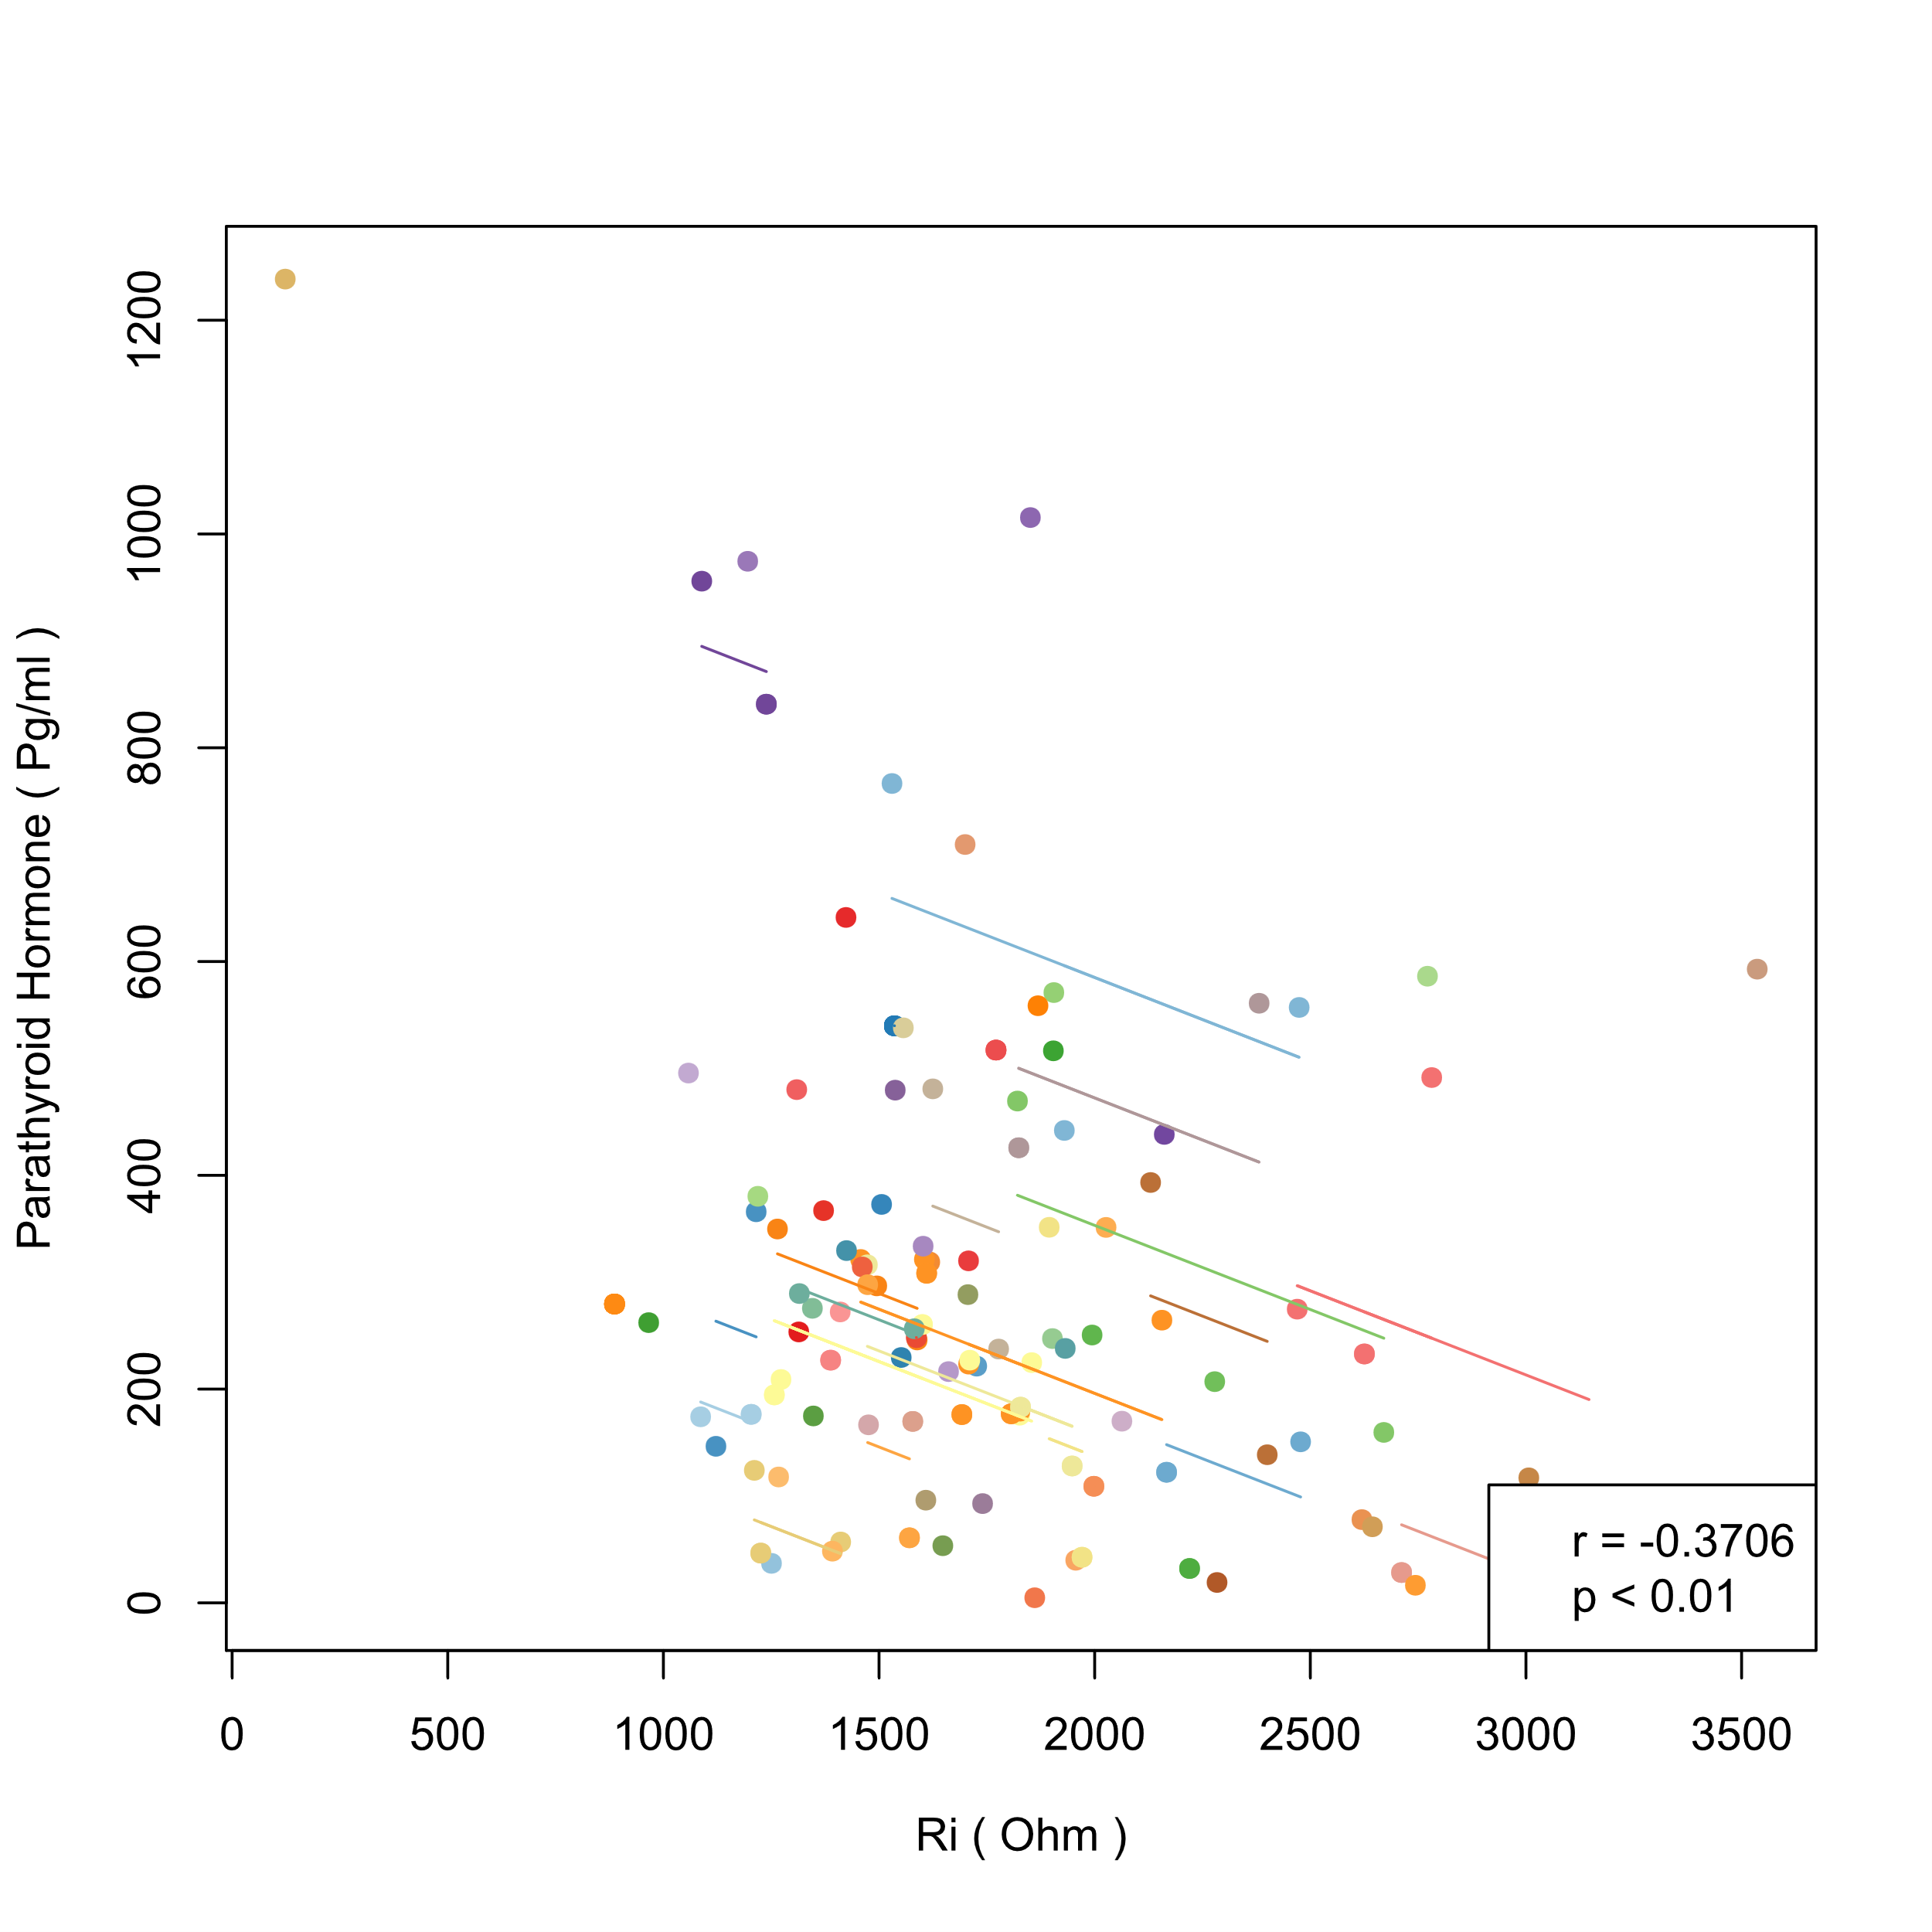 **(d)** PTH and Ri |

**Figure S3. (a-d) Intra-individual correlations between parathyroid hormone (PTH) and bioelectrical indices in men (each color represents a patient, different points in each color represent samples of the patient measured at different times, line of the color represents the regression result of intra-individual correlation on the samples of this patient. r and p in the legend are the correlation coefficient and p value of hypothesis testing in repeated measures correlation)**

**< Figure S4>**

| 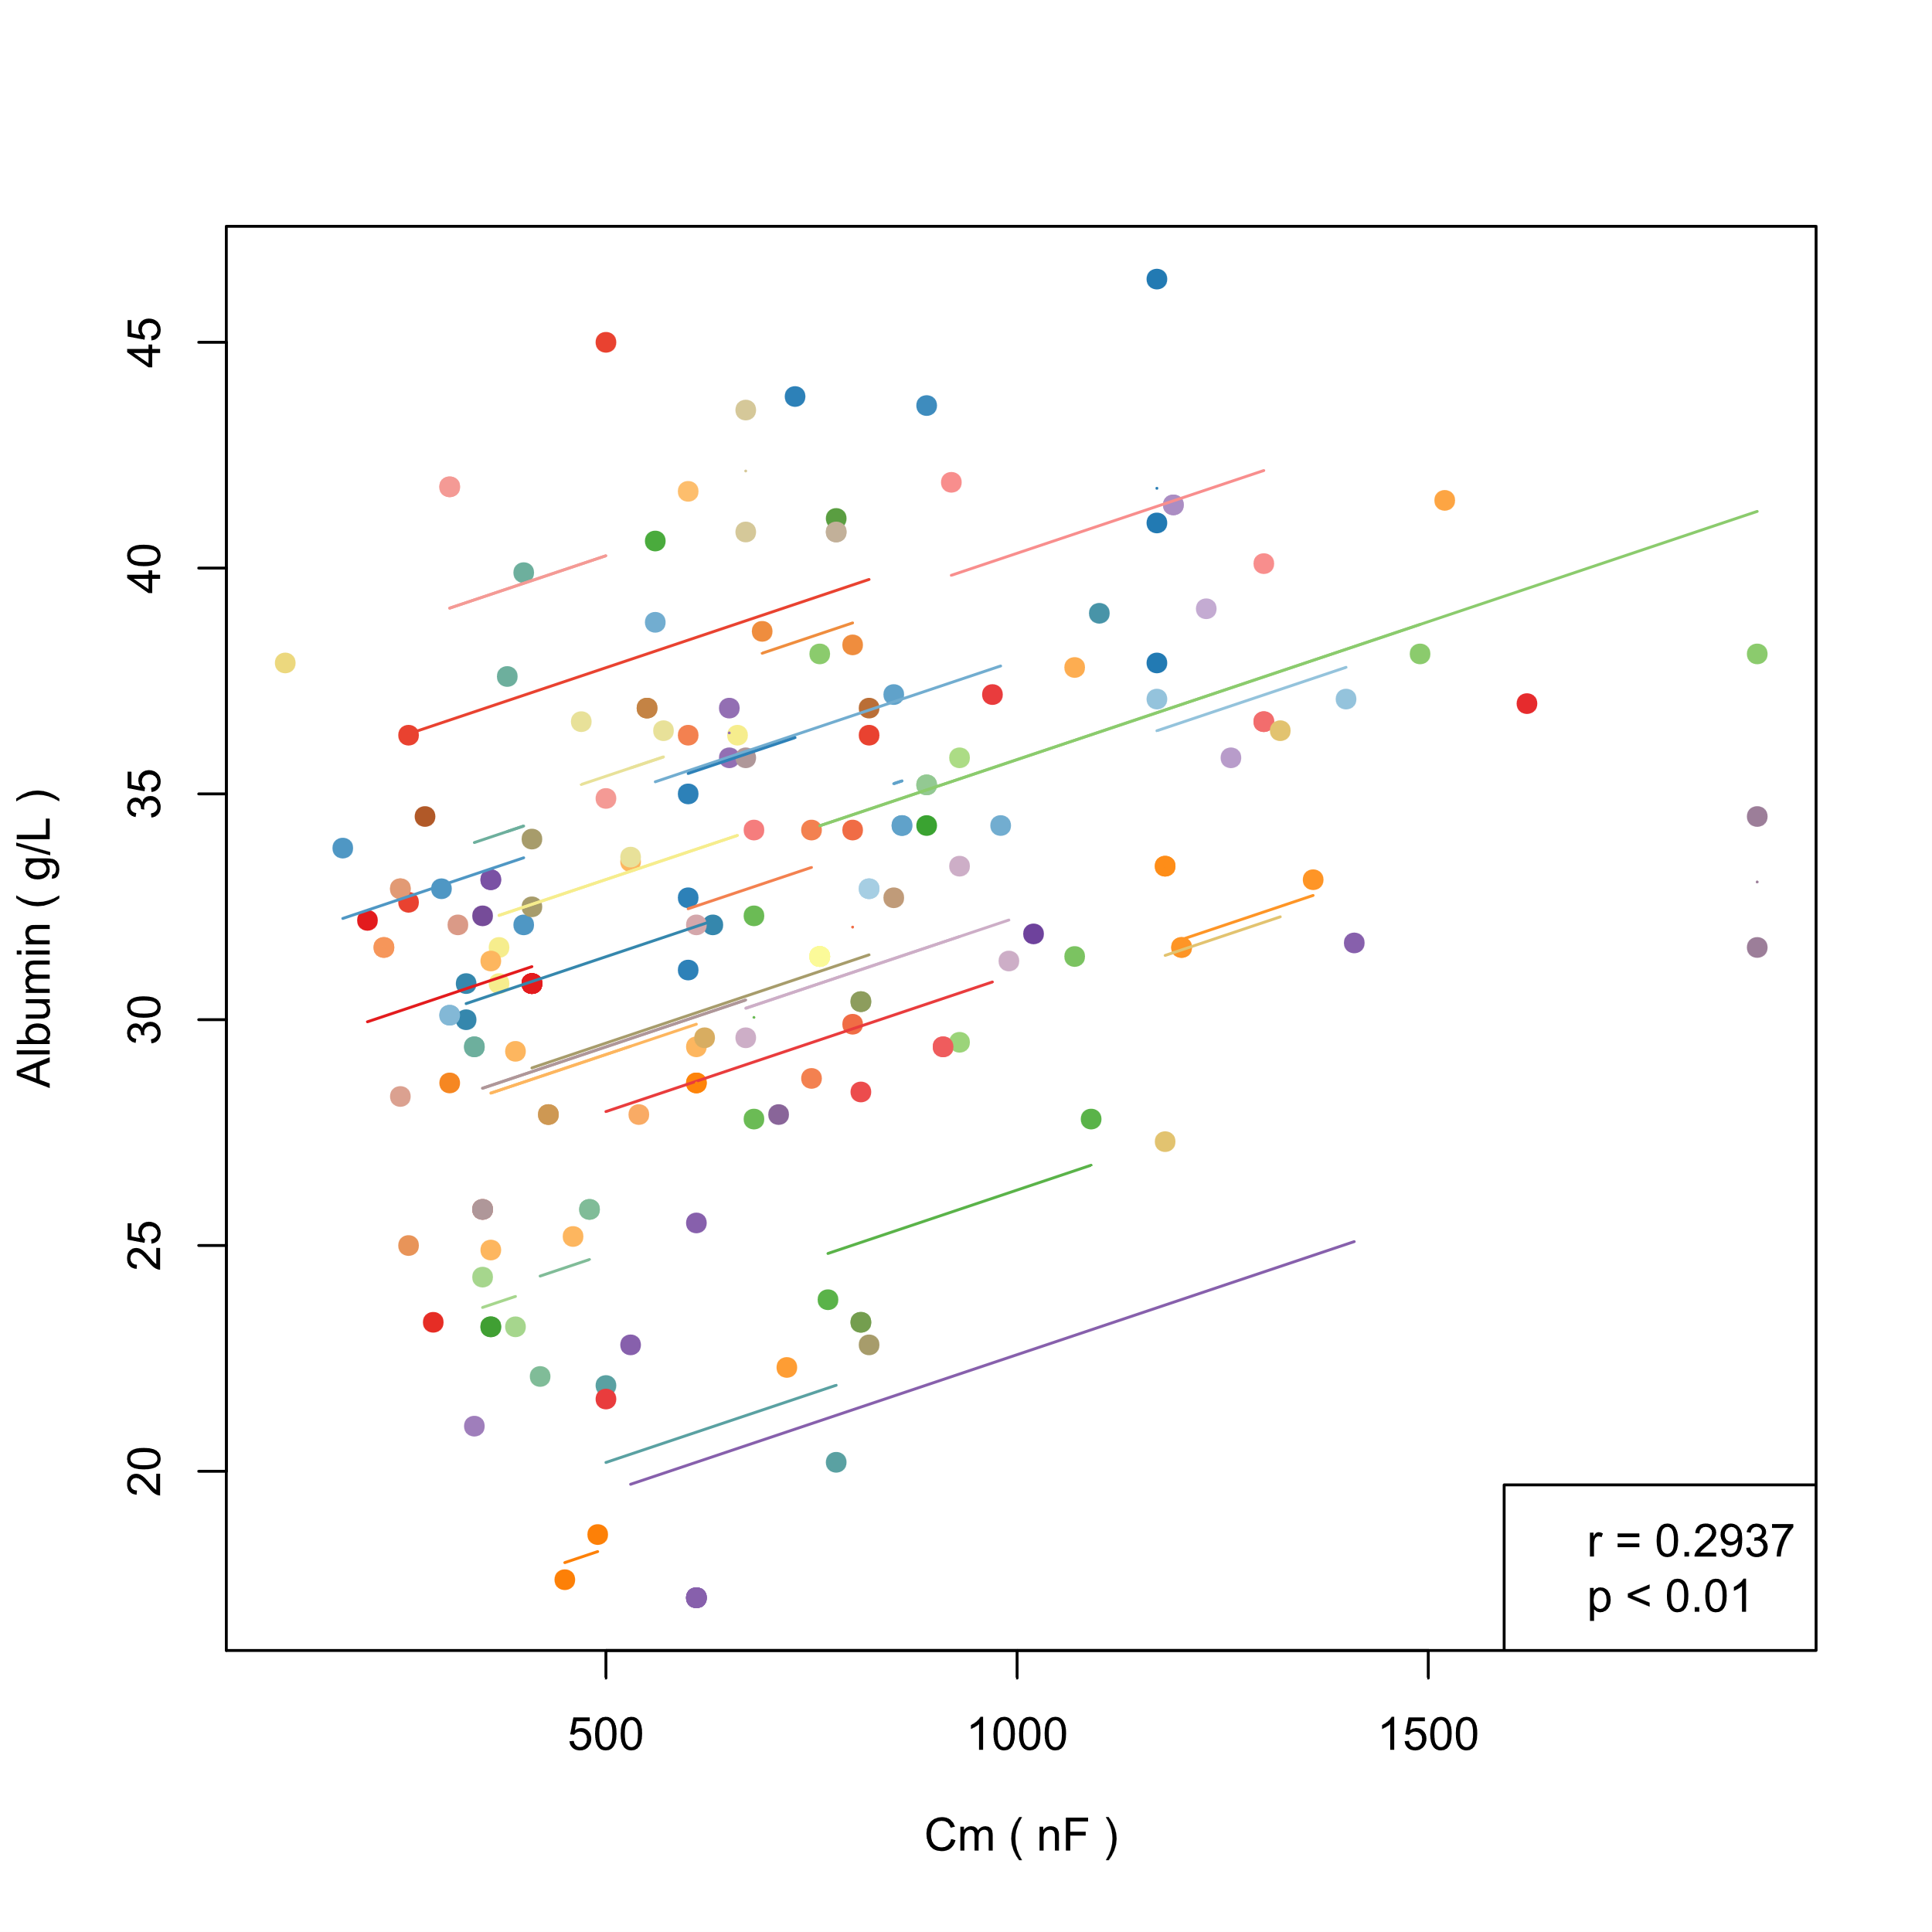 **(a)** Alb and Cm | 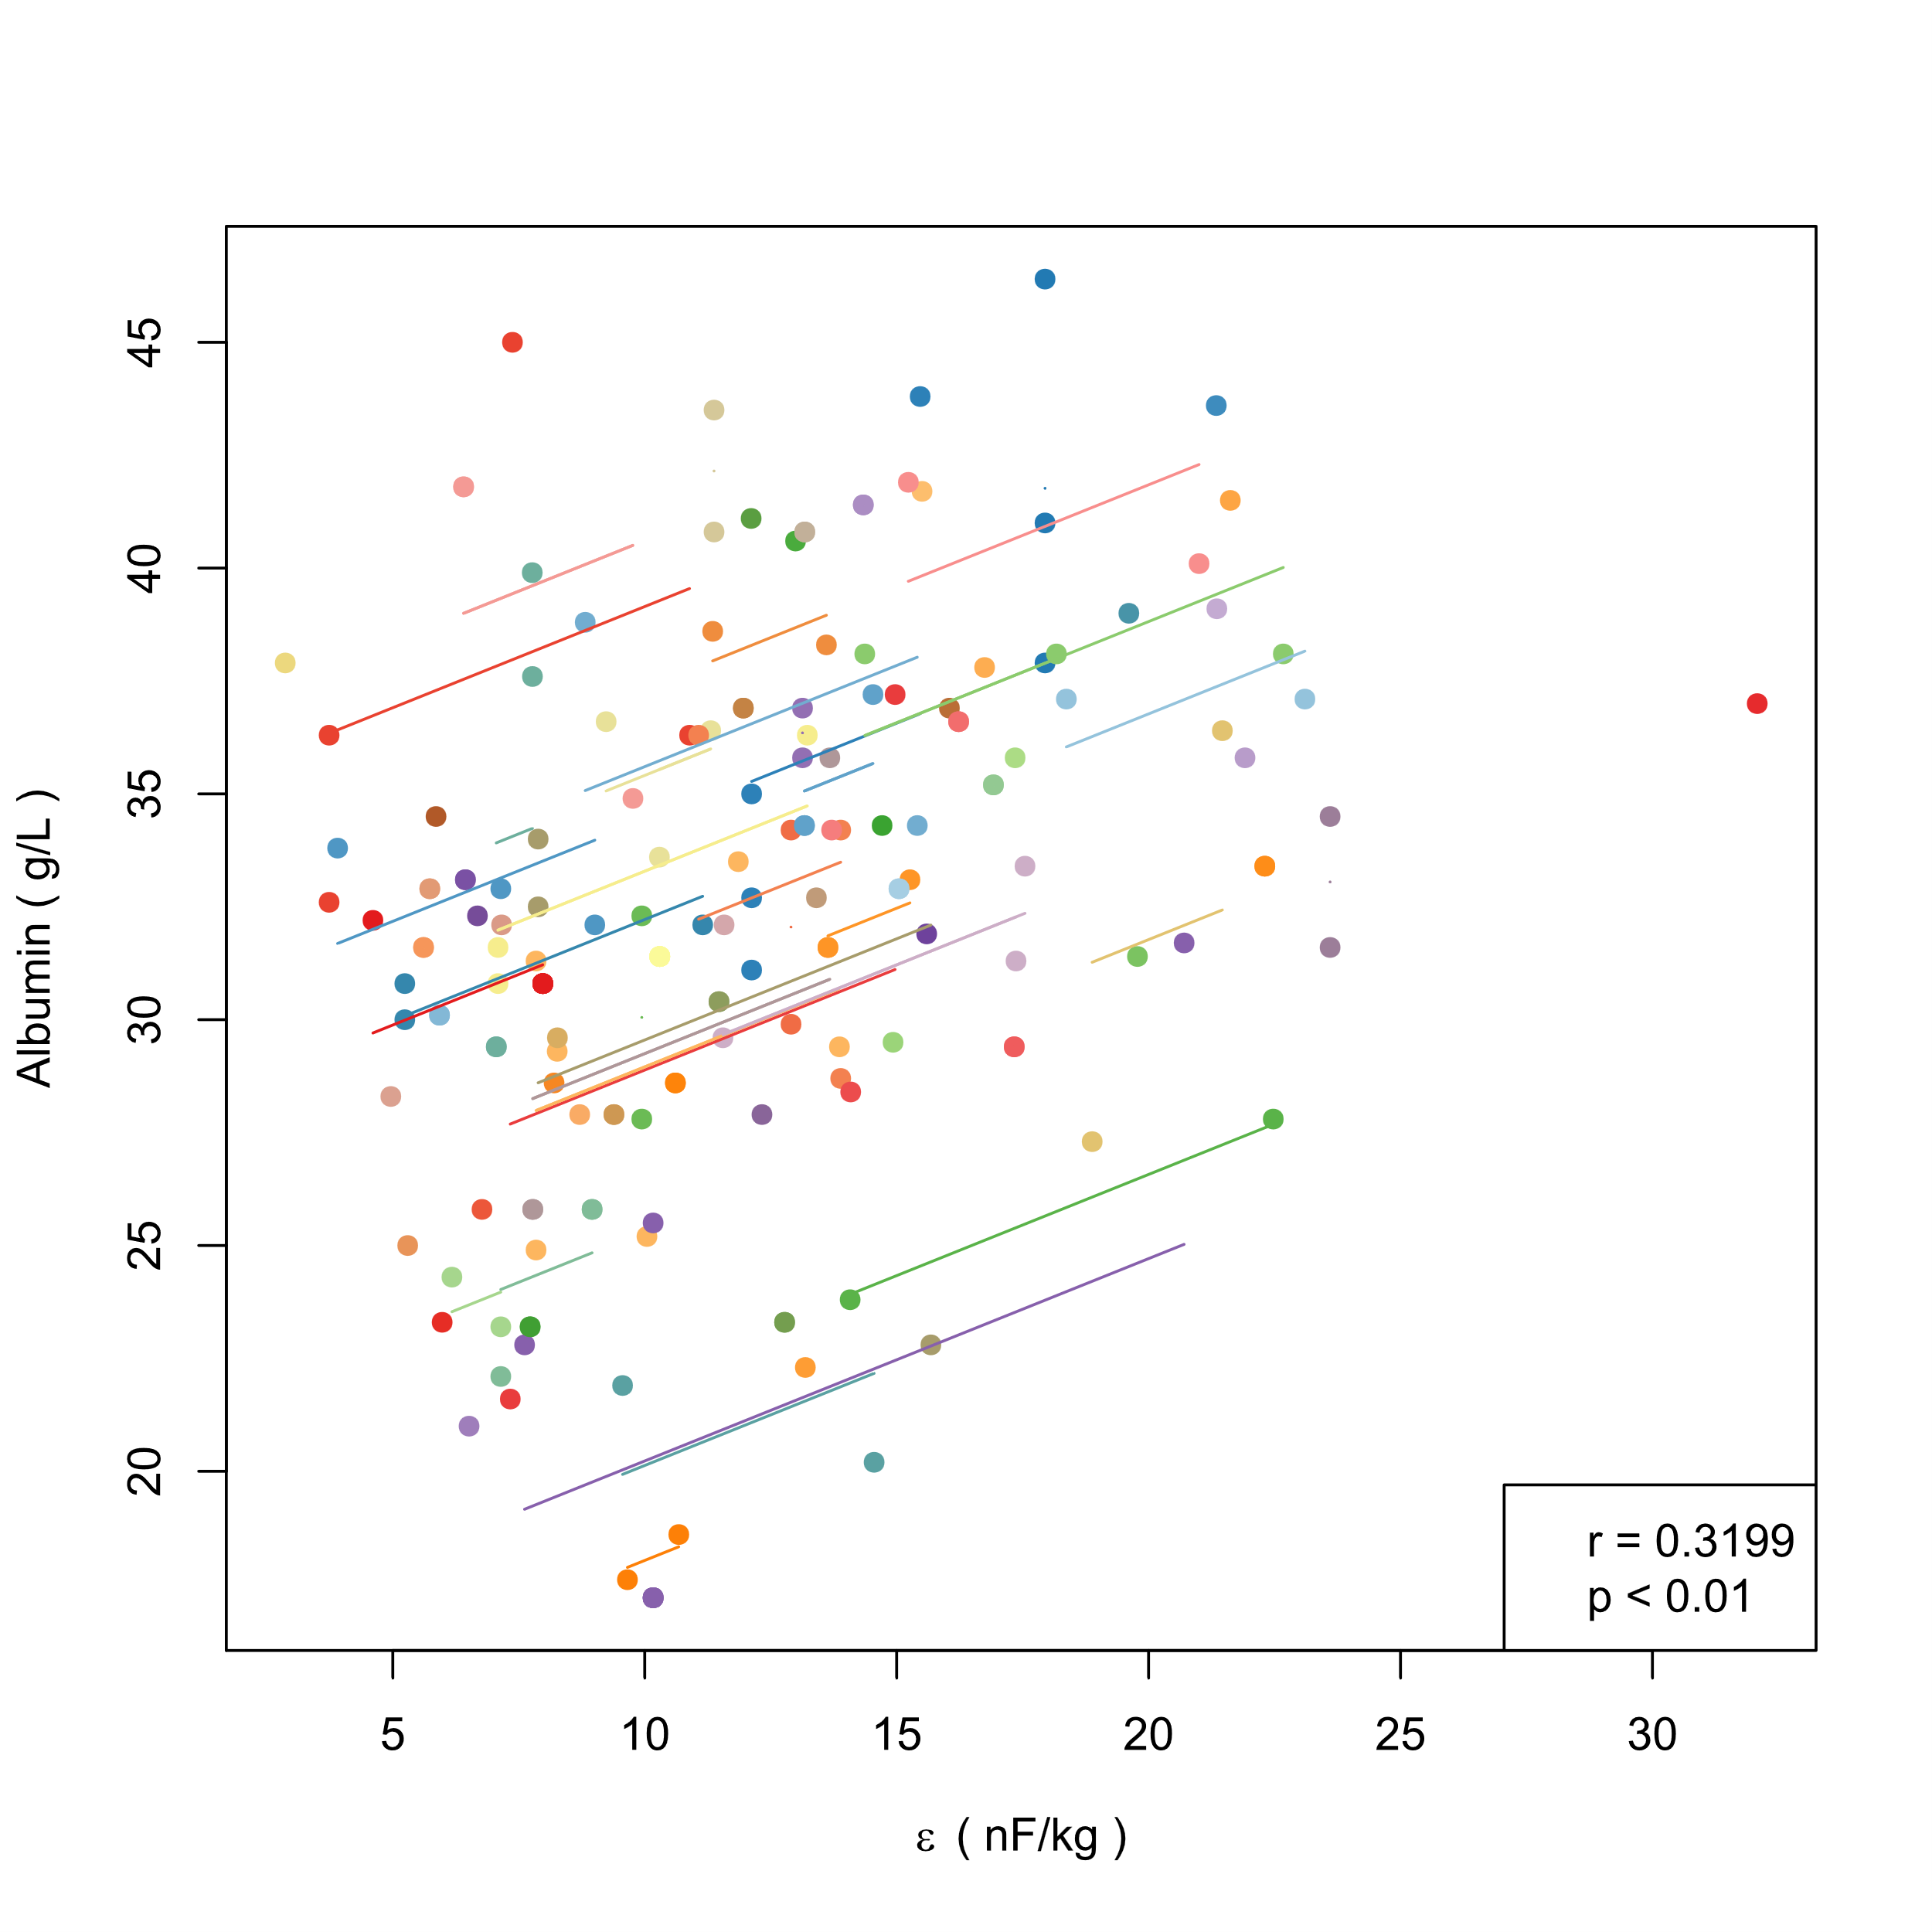 **(b)** Alb and ε |
| --- | --- |
| 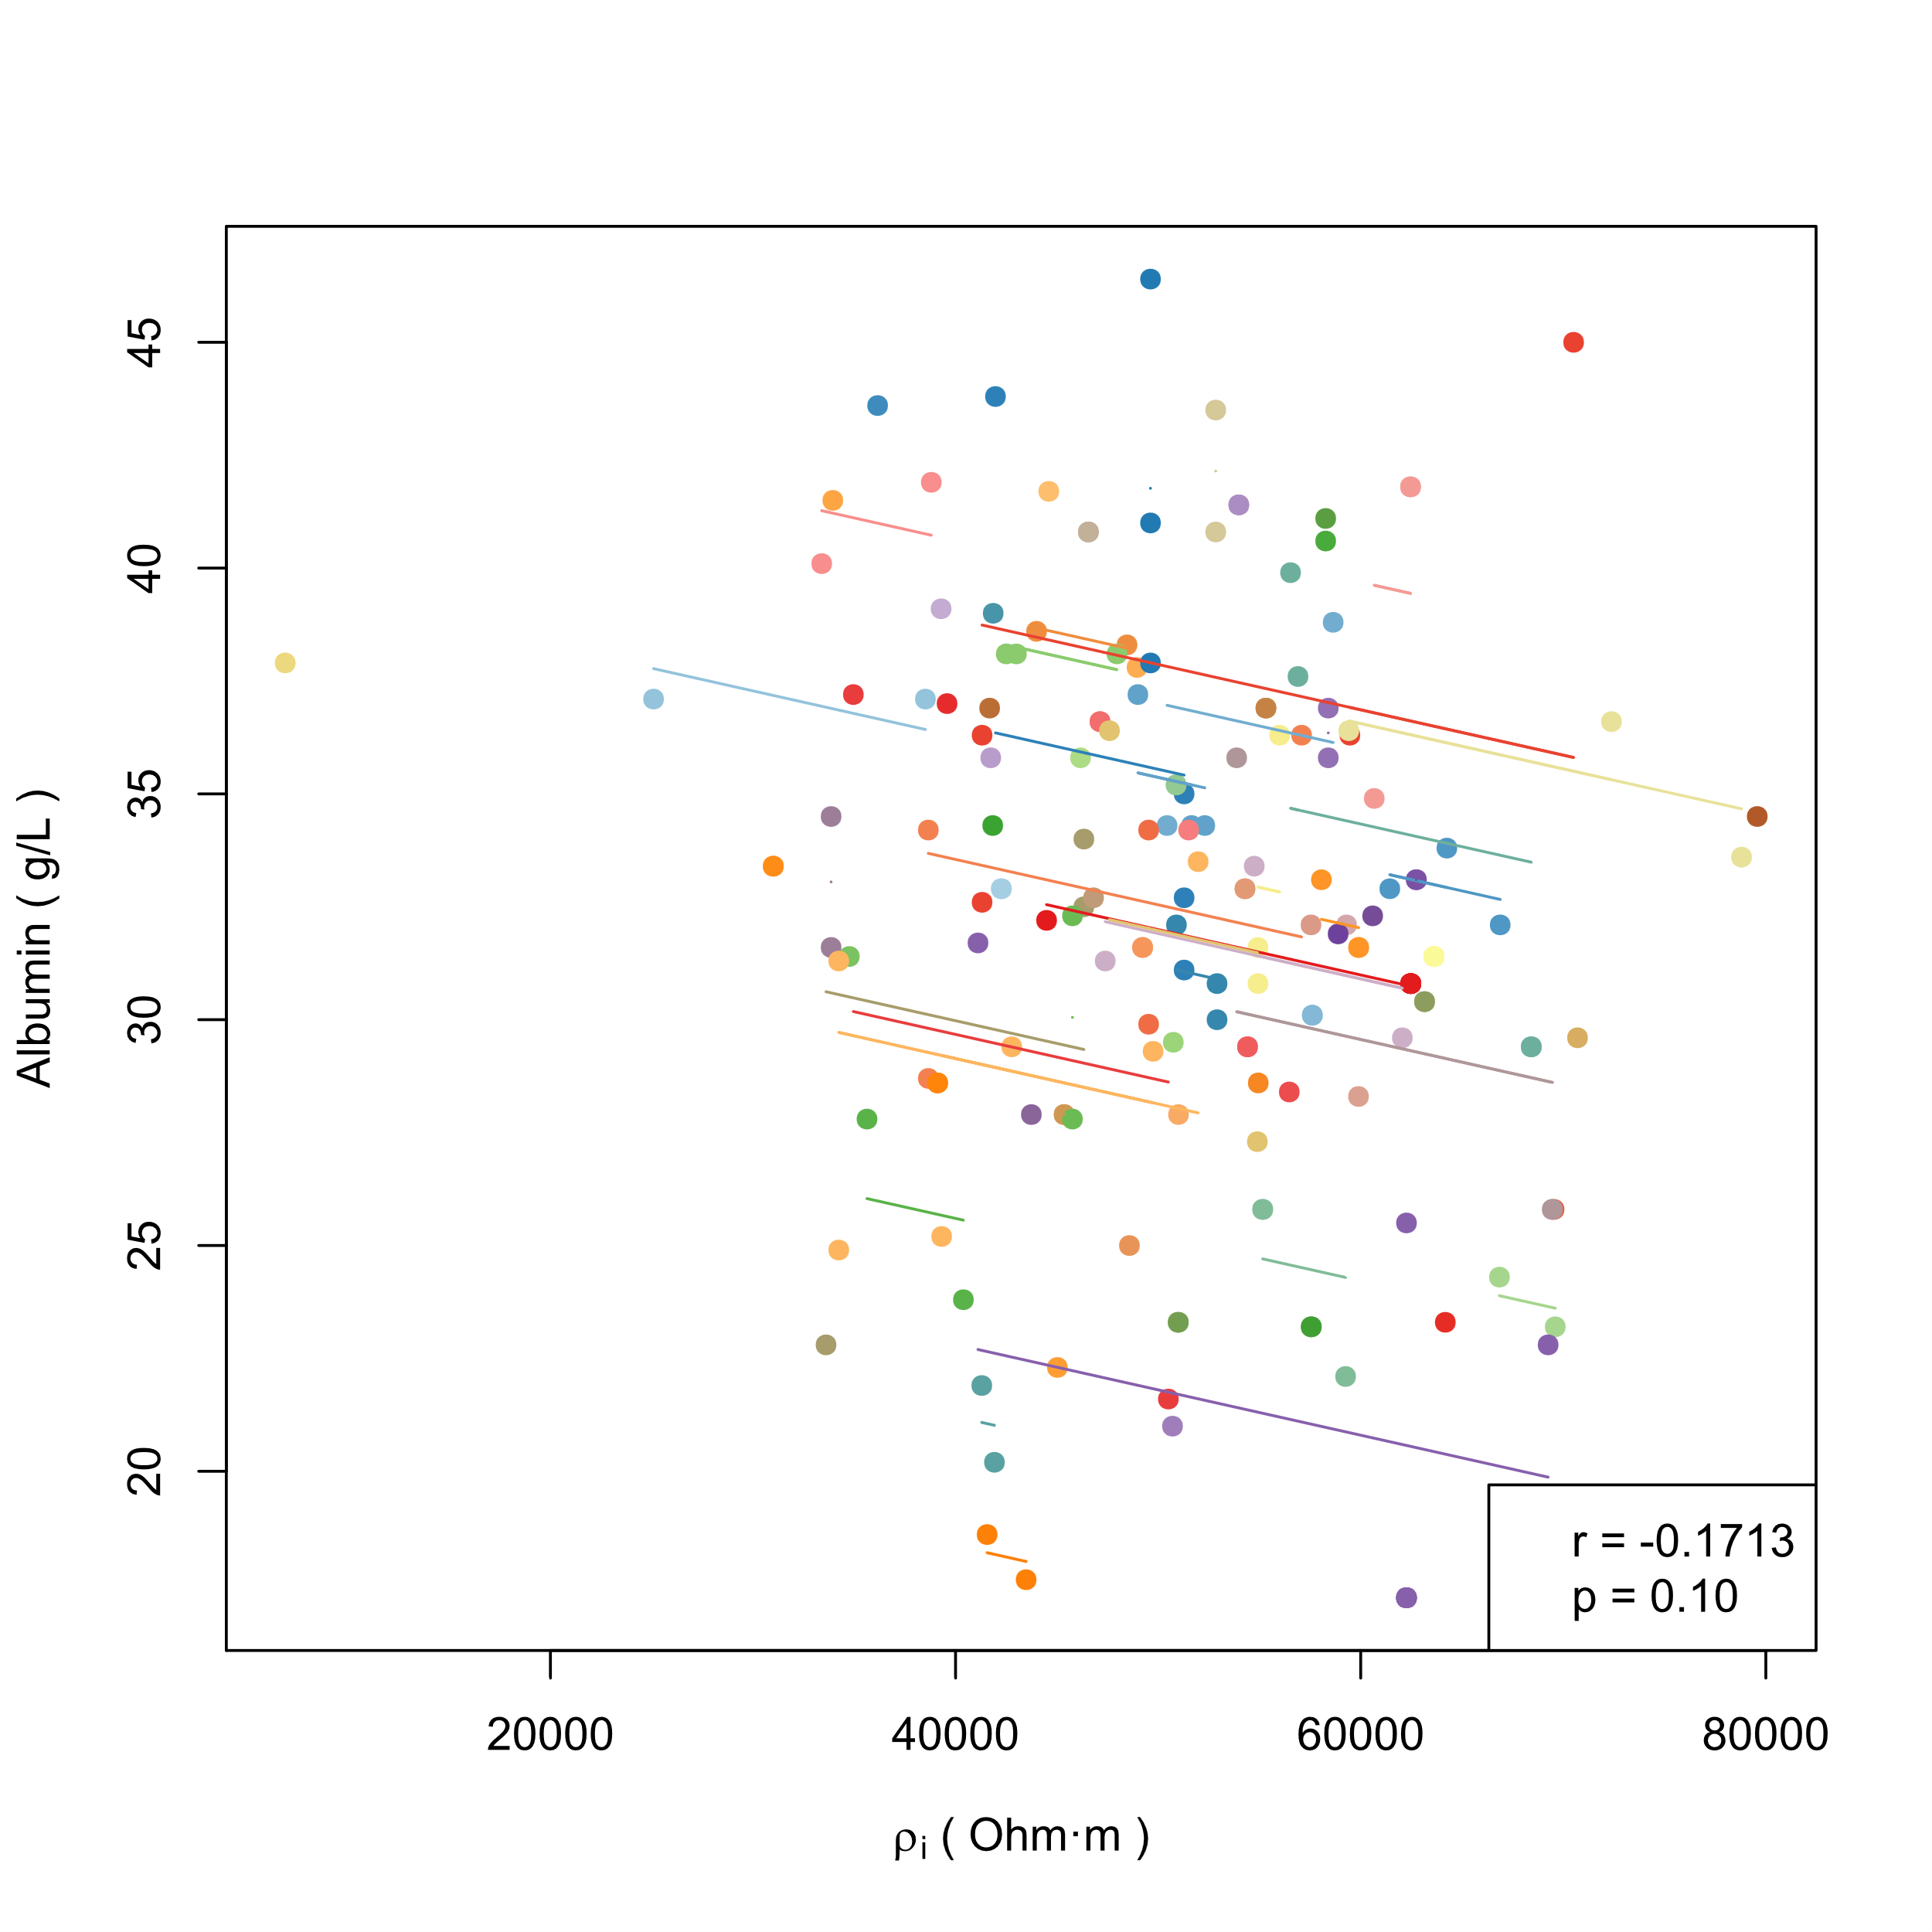 **(c)** Alb and ρi | 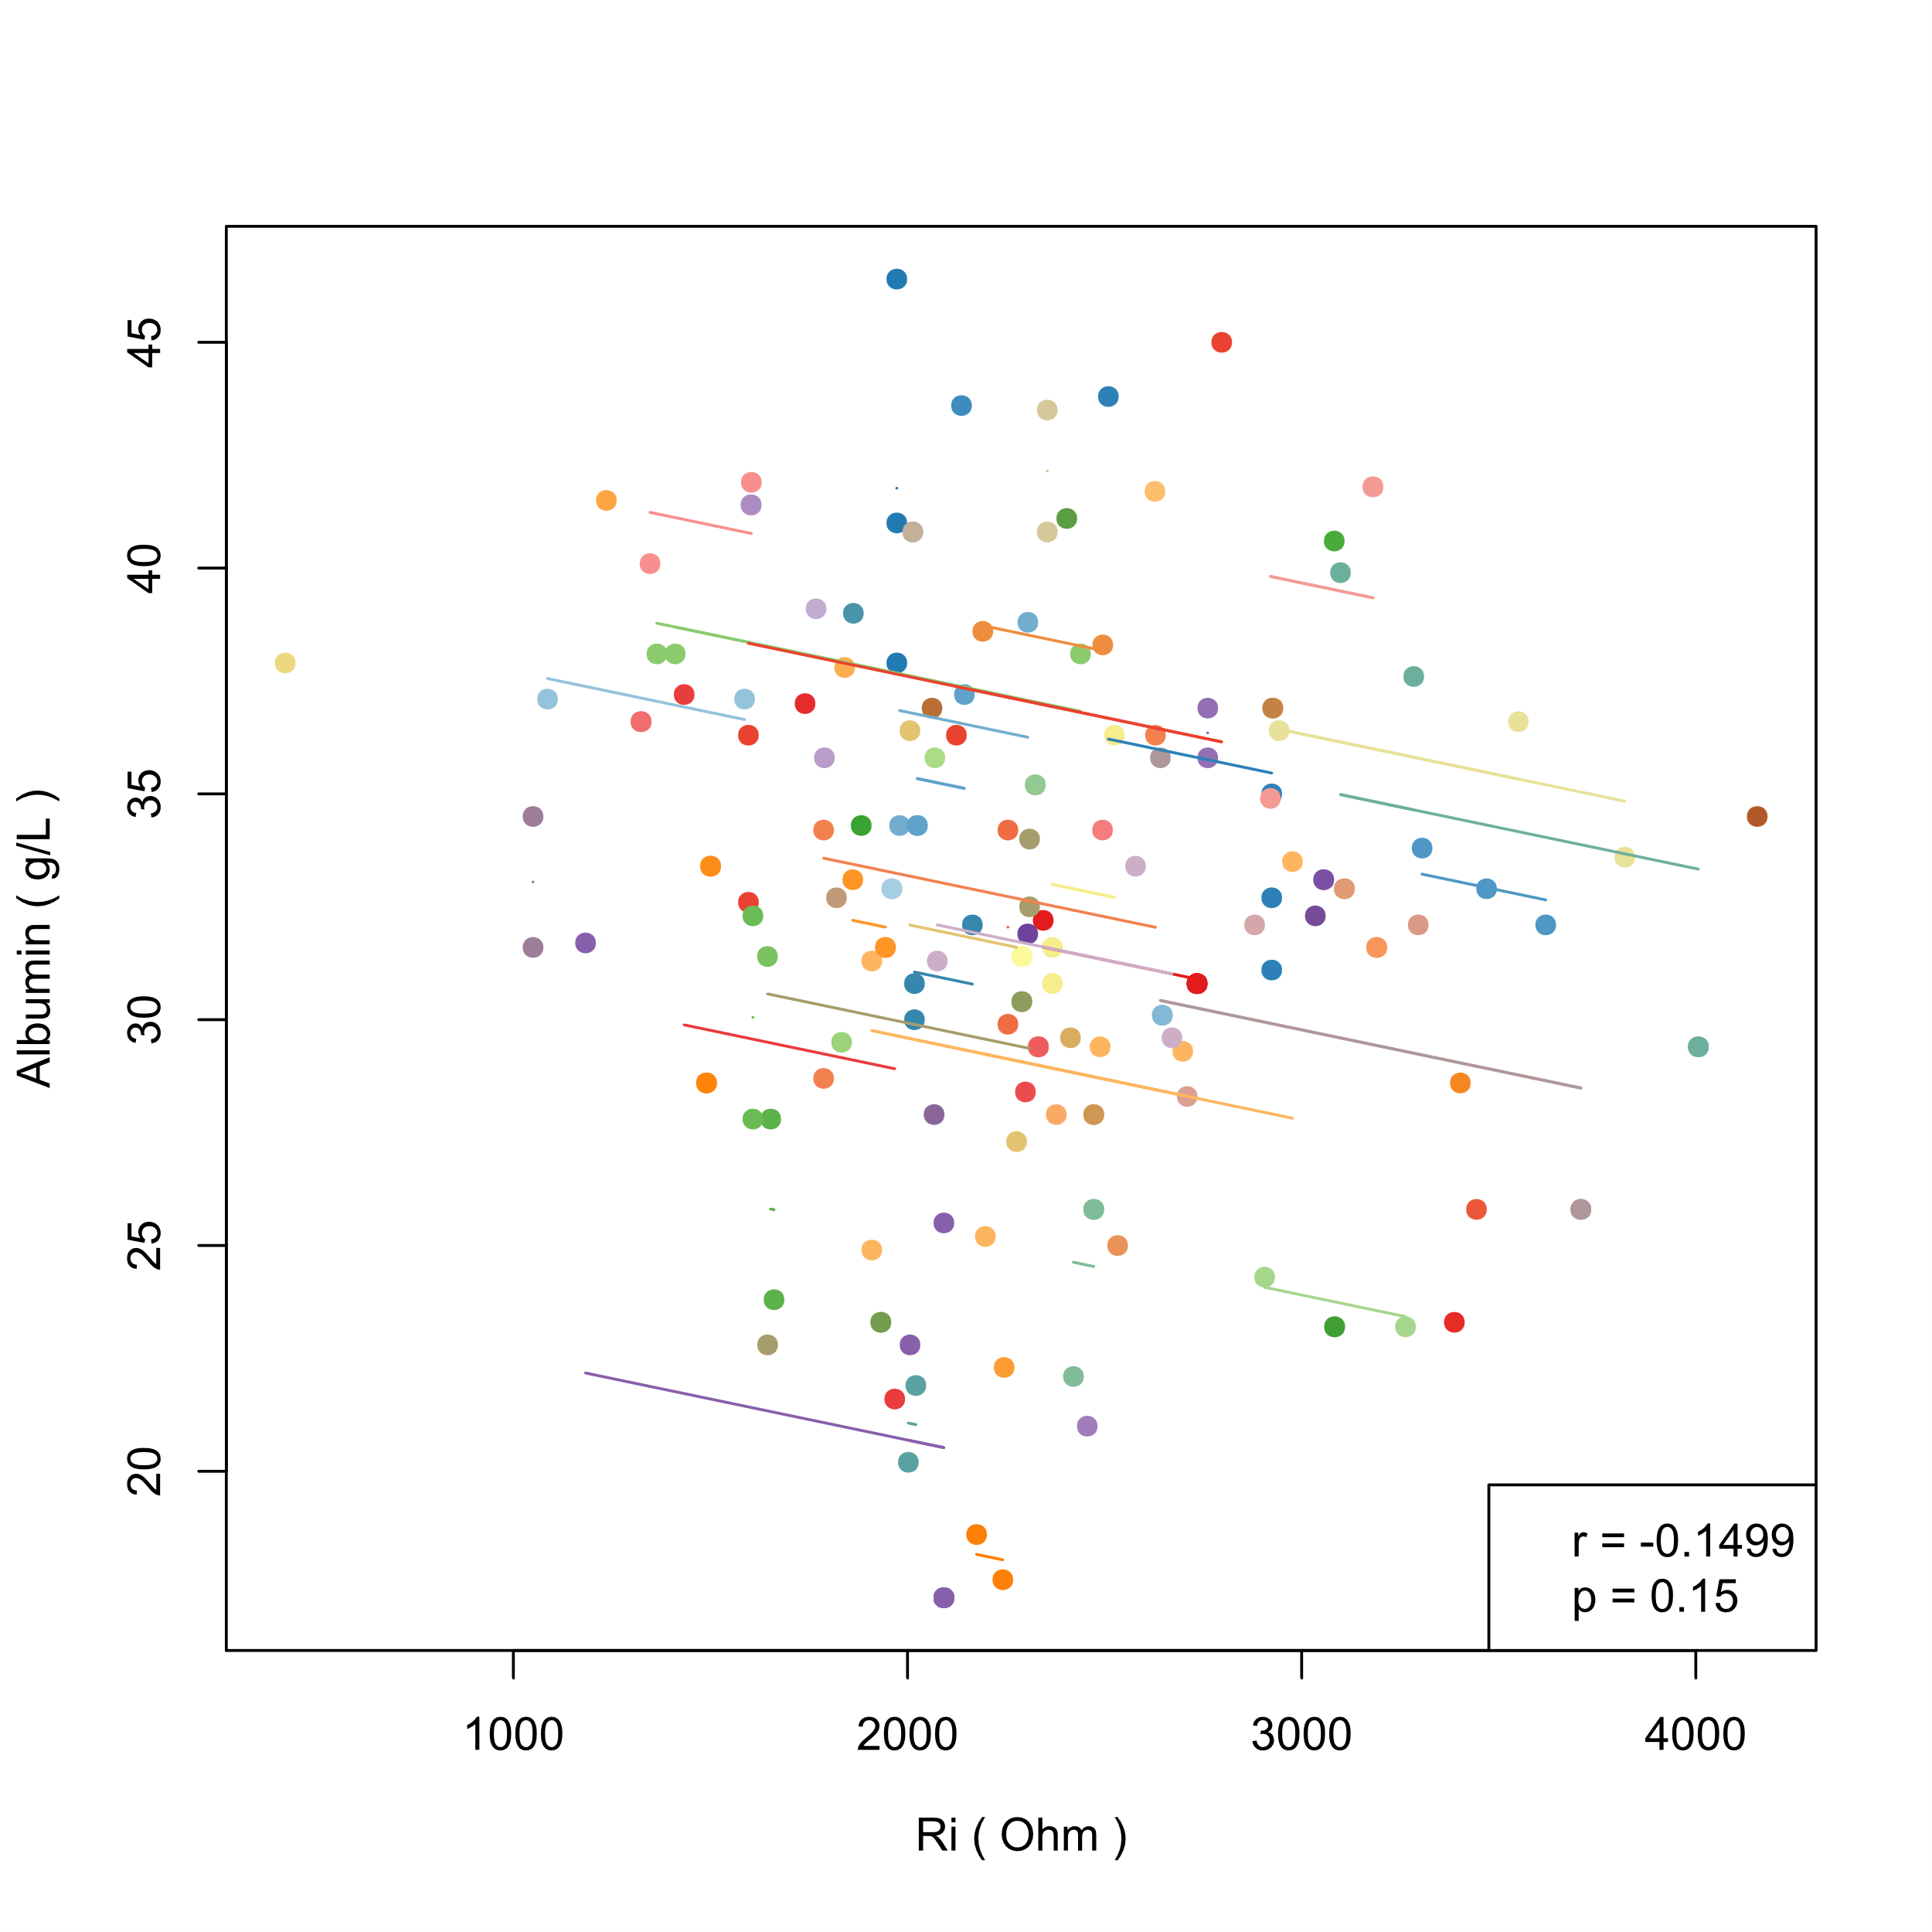 **(d)** Alb and Ri |

**Figure S4. (a-d) Intra-individual correlations between albumin (Alb) and bioelectrical indices in women (each color represents a patient, different points in each color represent samples of the patient measured at different times, line of the color represents the regression result of intra-individual correlation on the samples of this patient. r and p in the legend are the correlation coefficient and p value of hypothesis testing in repeated measures correlation)**

**< Figure S5>**

| 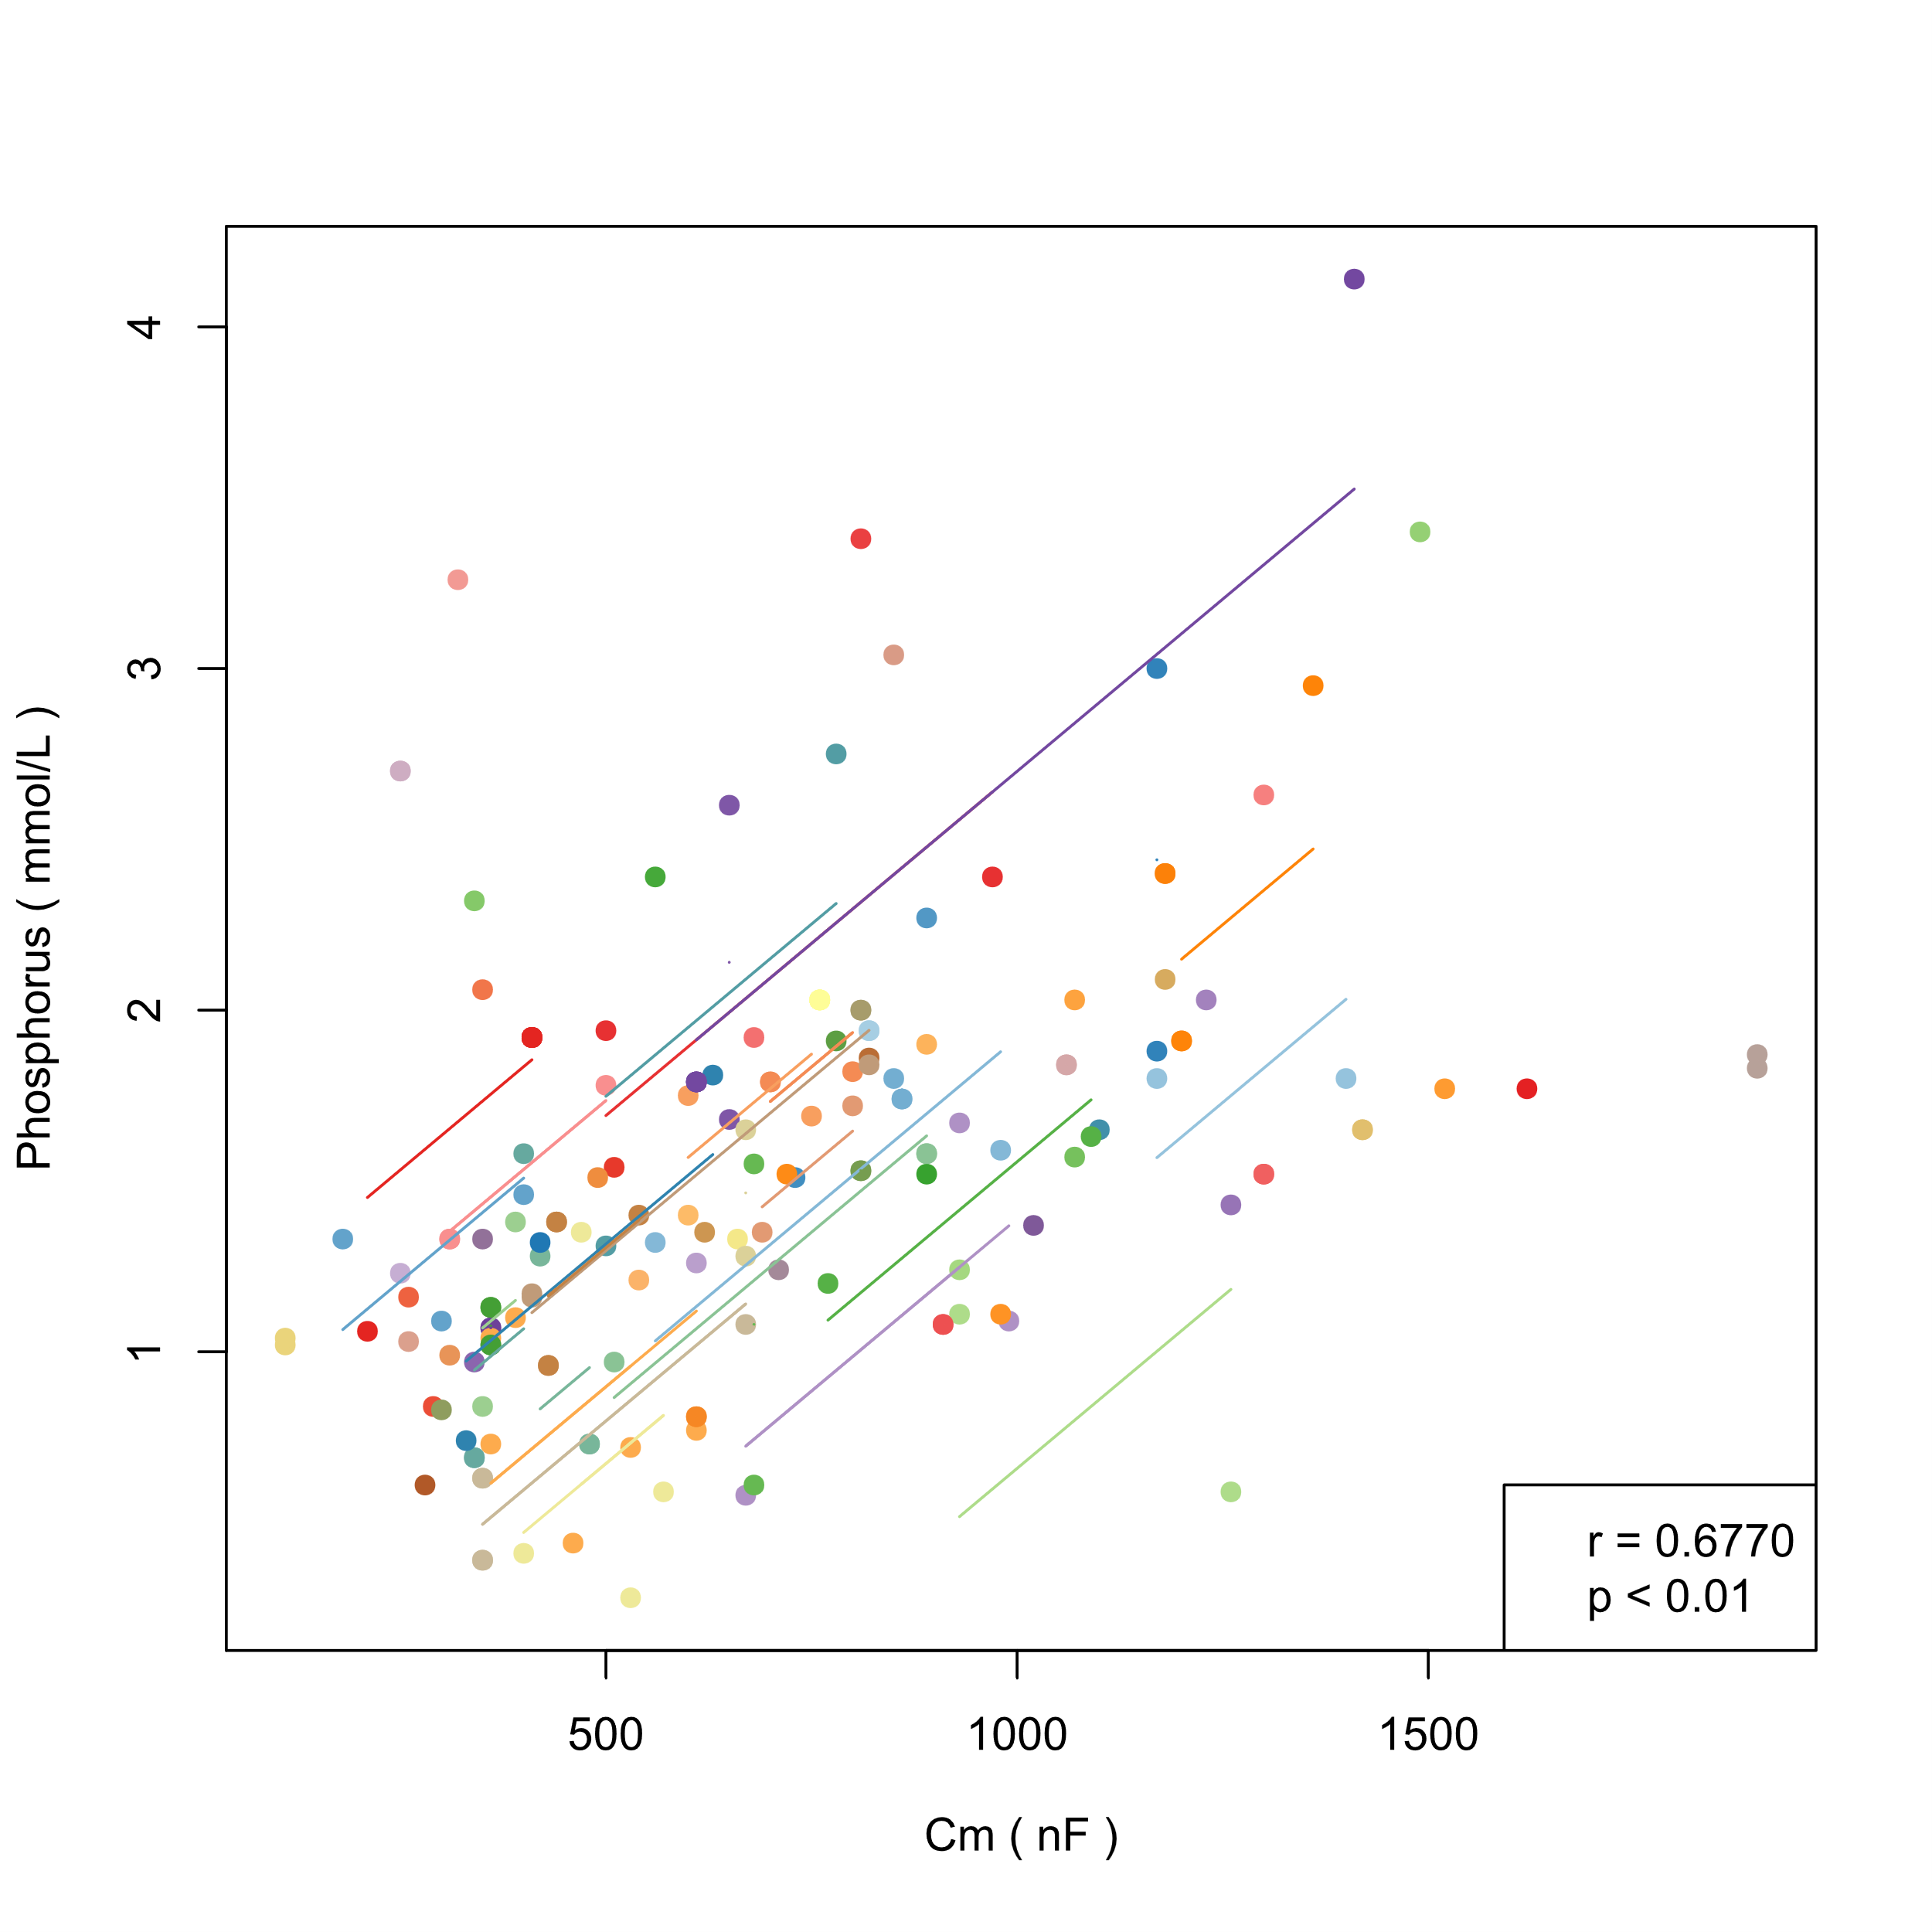 **(a)** P and Cm | 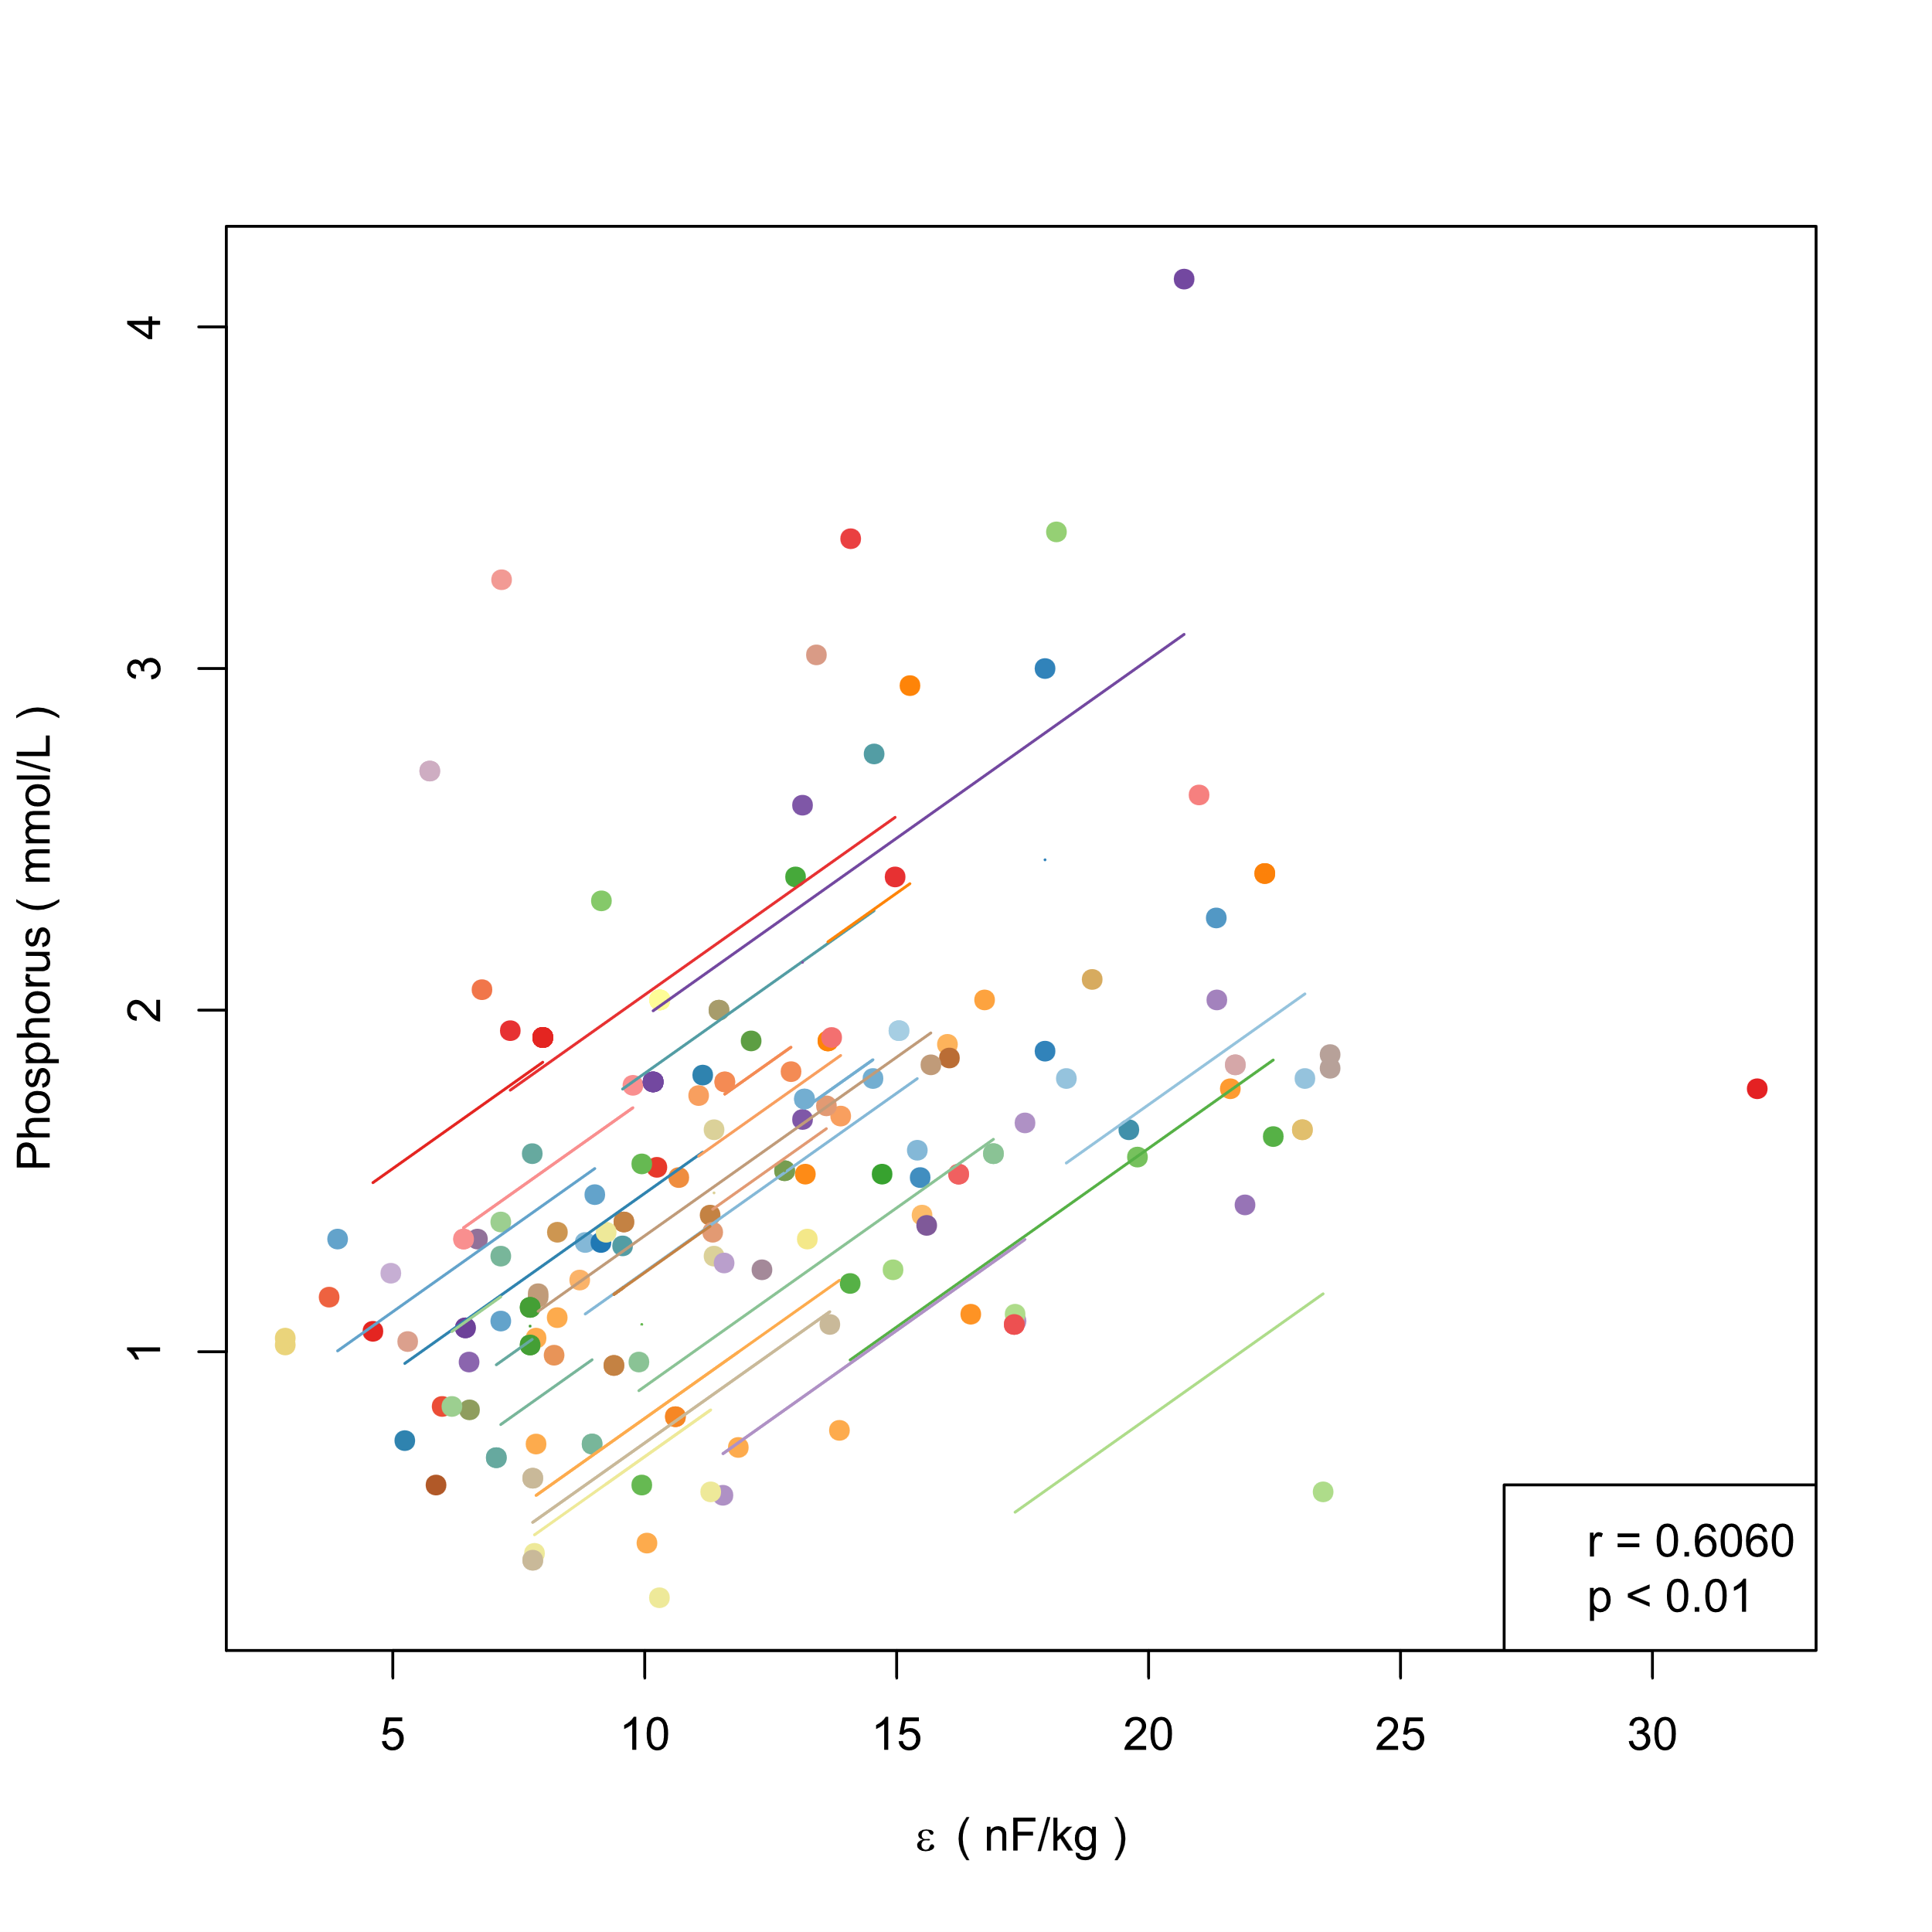 **(b)** P and ε |
| --- | --- |
| 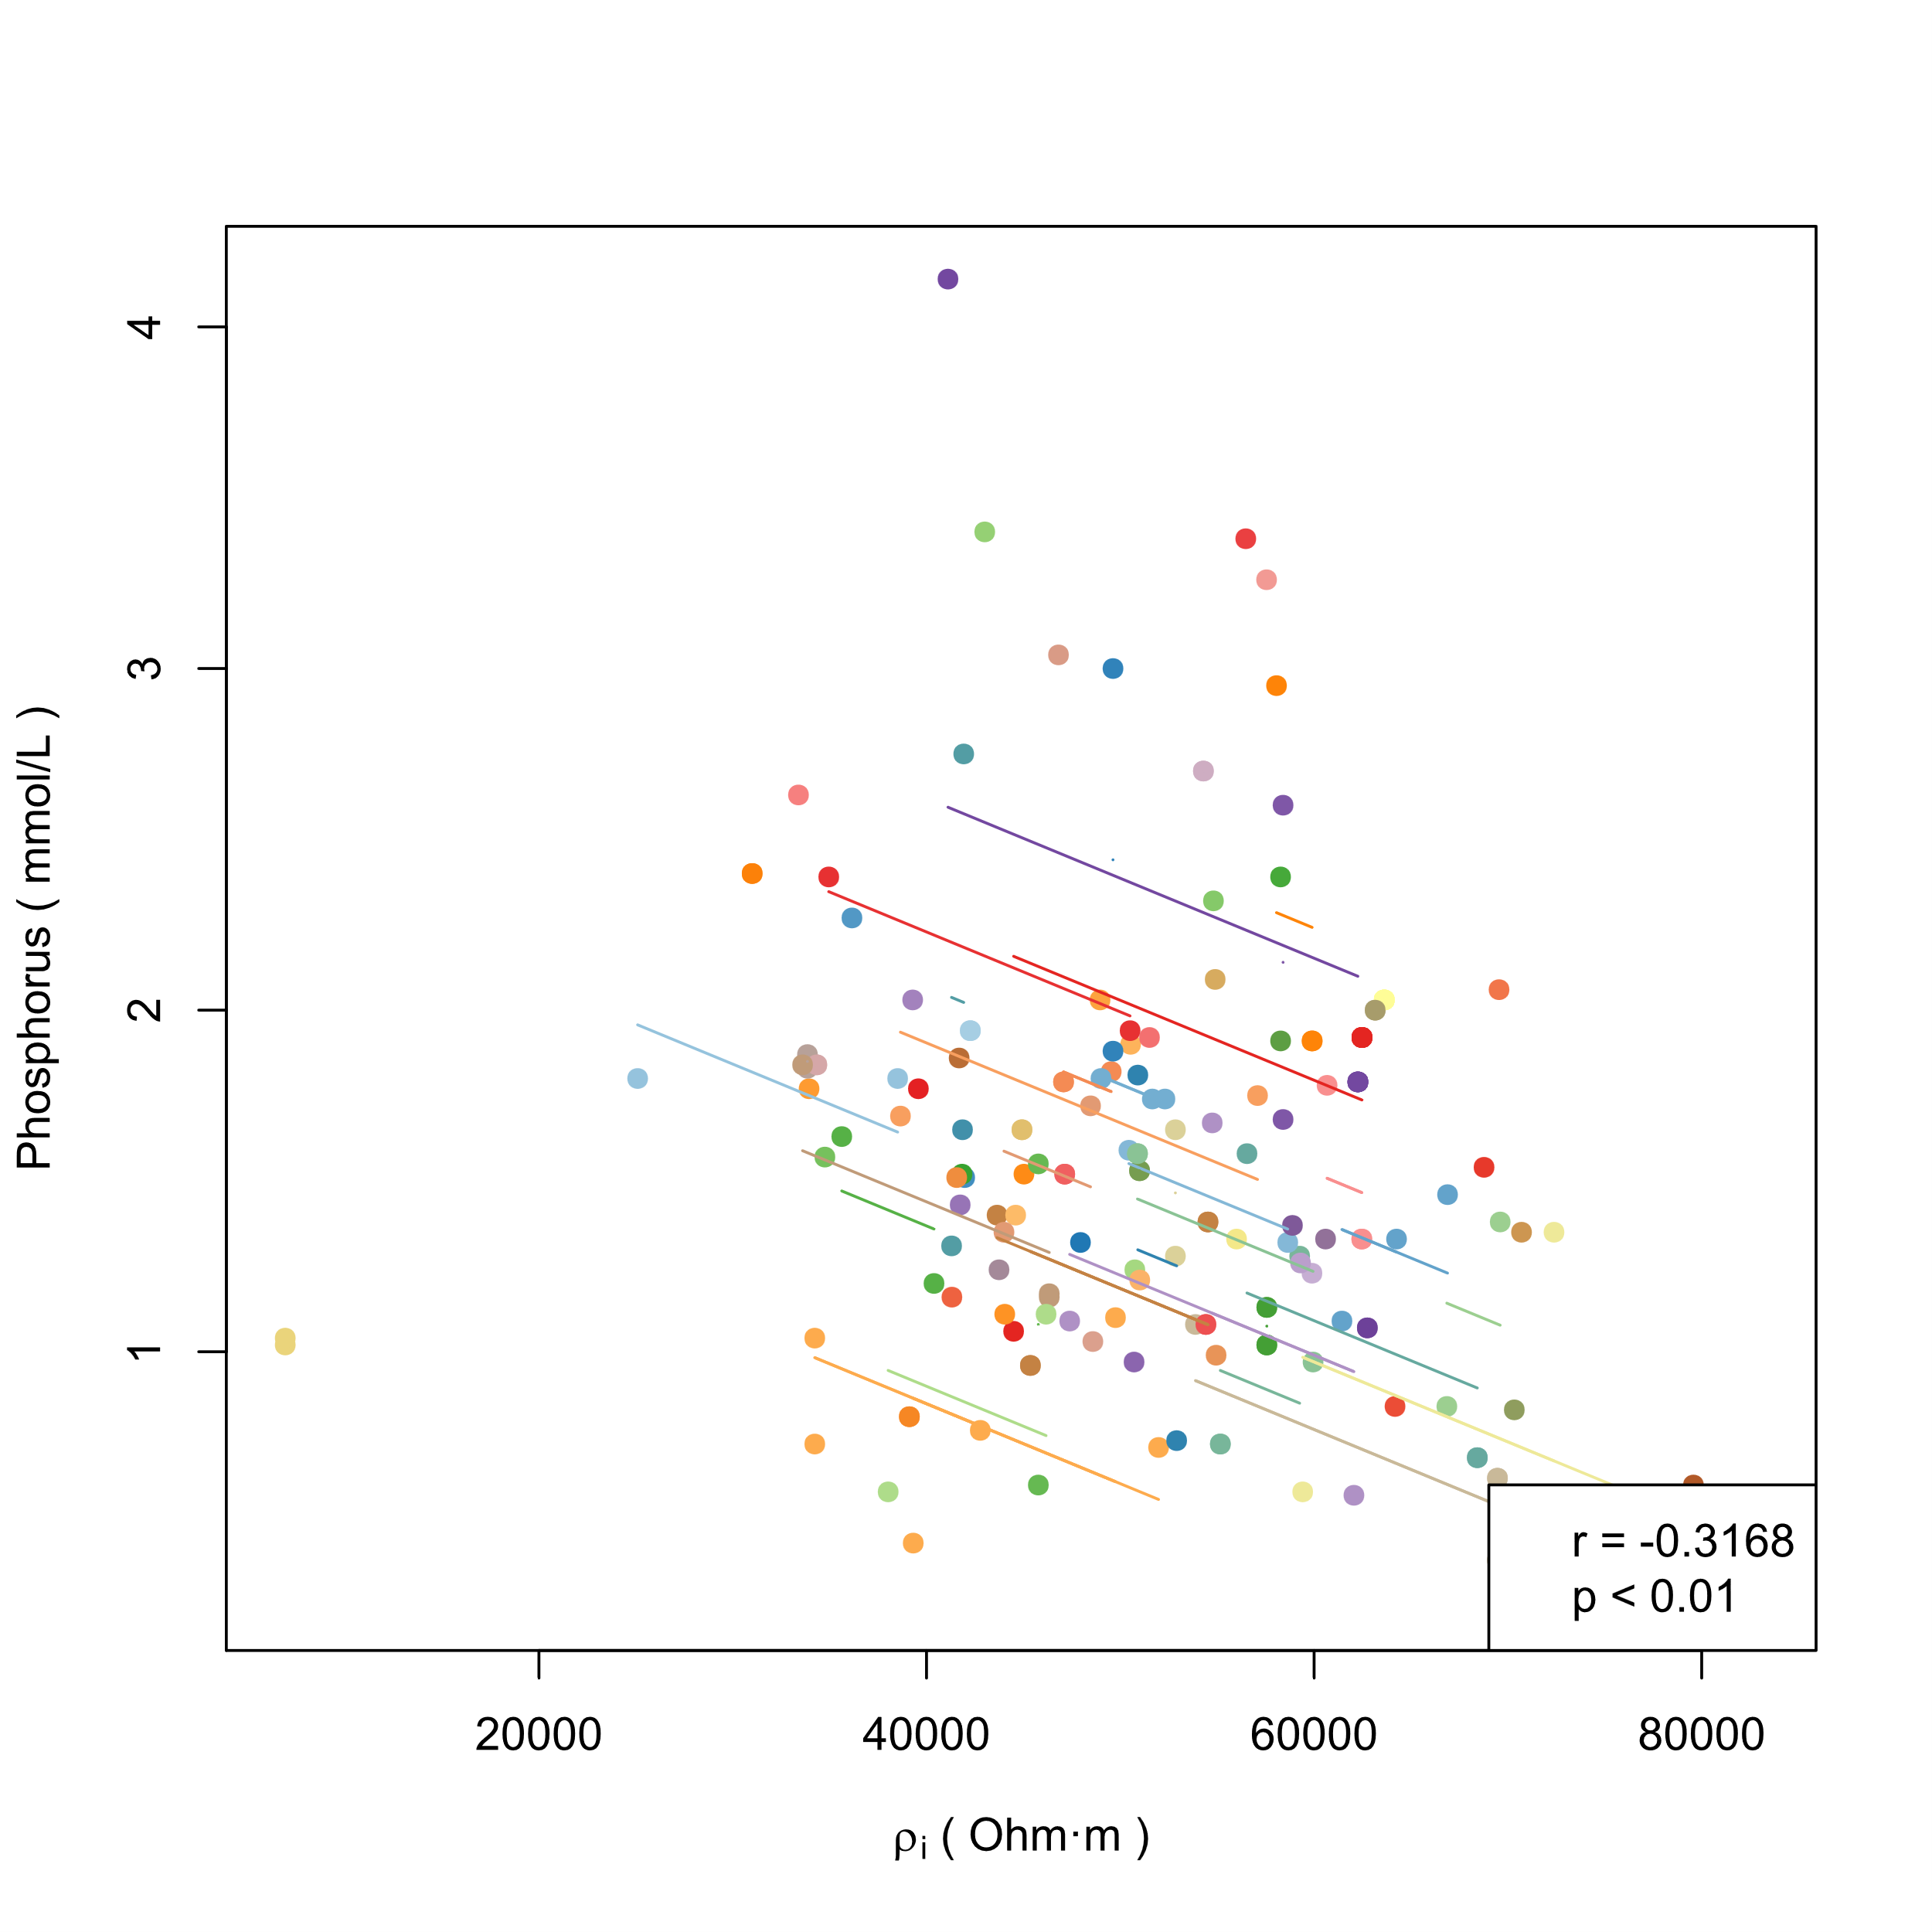 **(c)** P and ρi | 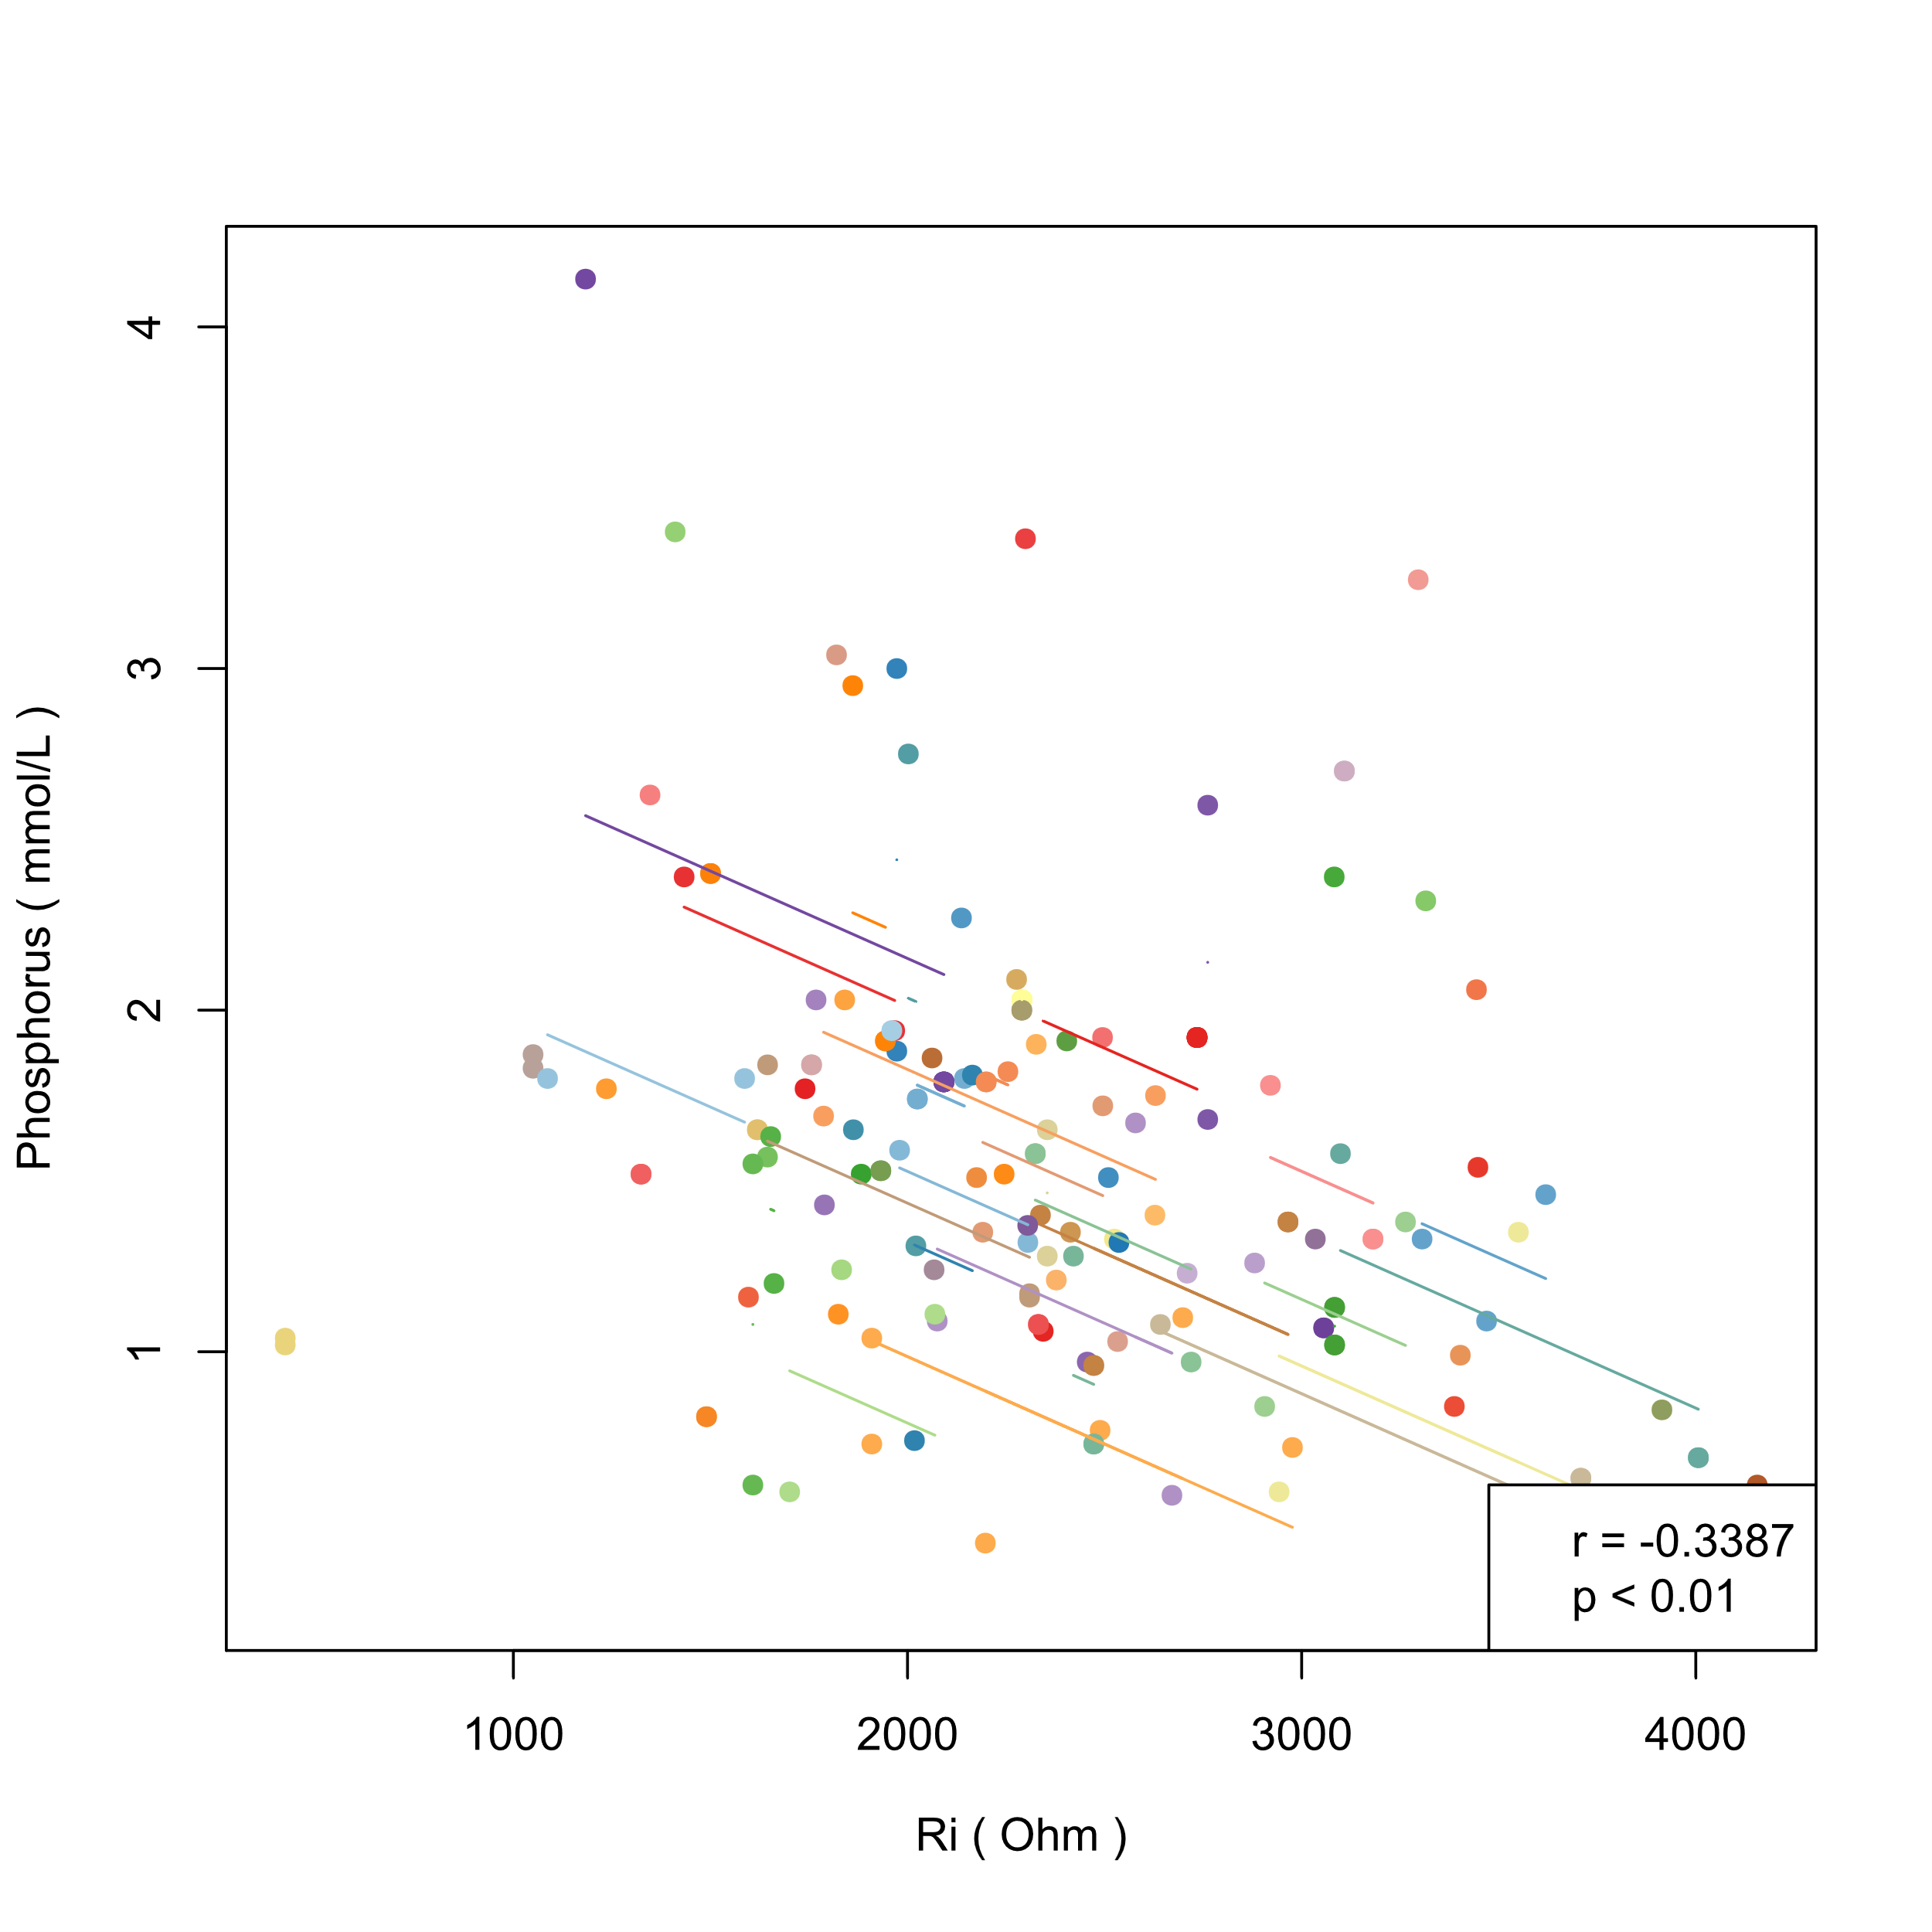 **(d)** P and Ri |

**Figure S5. (a-d) Intra-individual correlations between P and bioelectrical indices in women (each color represents a patient, different points in each color represent samples of the patient measured at different times, line of the color represents the regression result of intra-individual correlation on the samples of this patient. r and p in the legend are the correlation coefficient and p value of hypothesis testing in repeated measures correlation)**

**< Figure S6>**

| 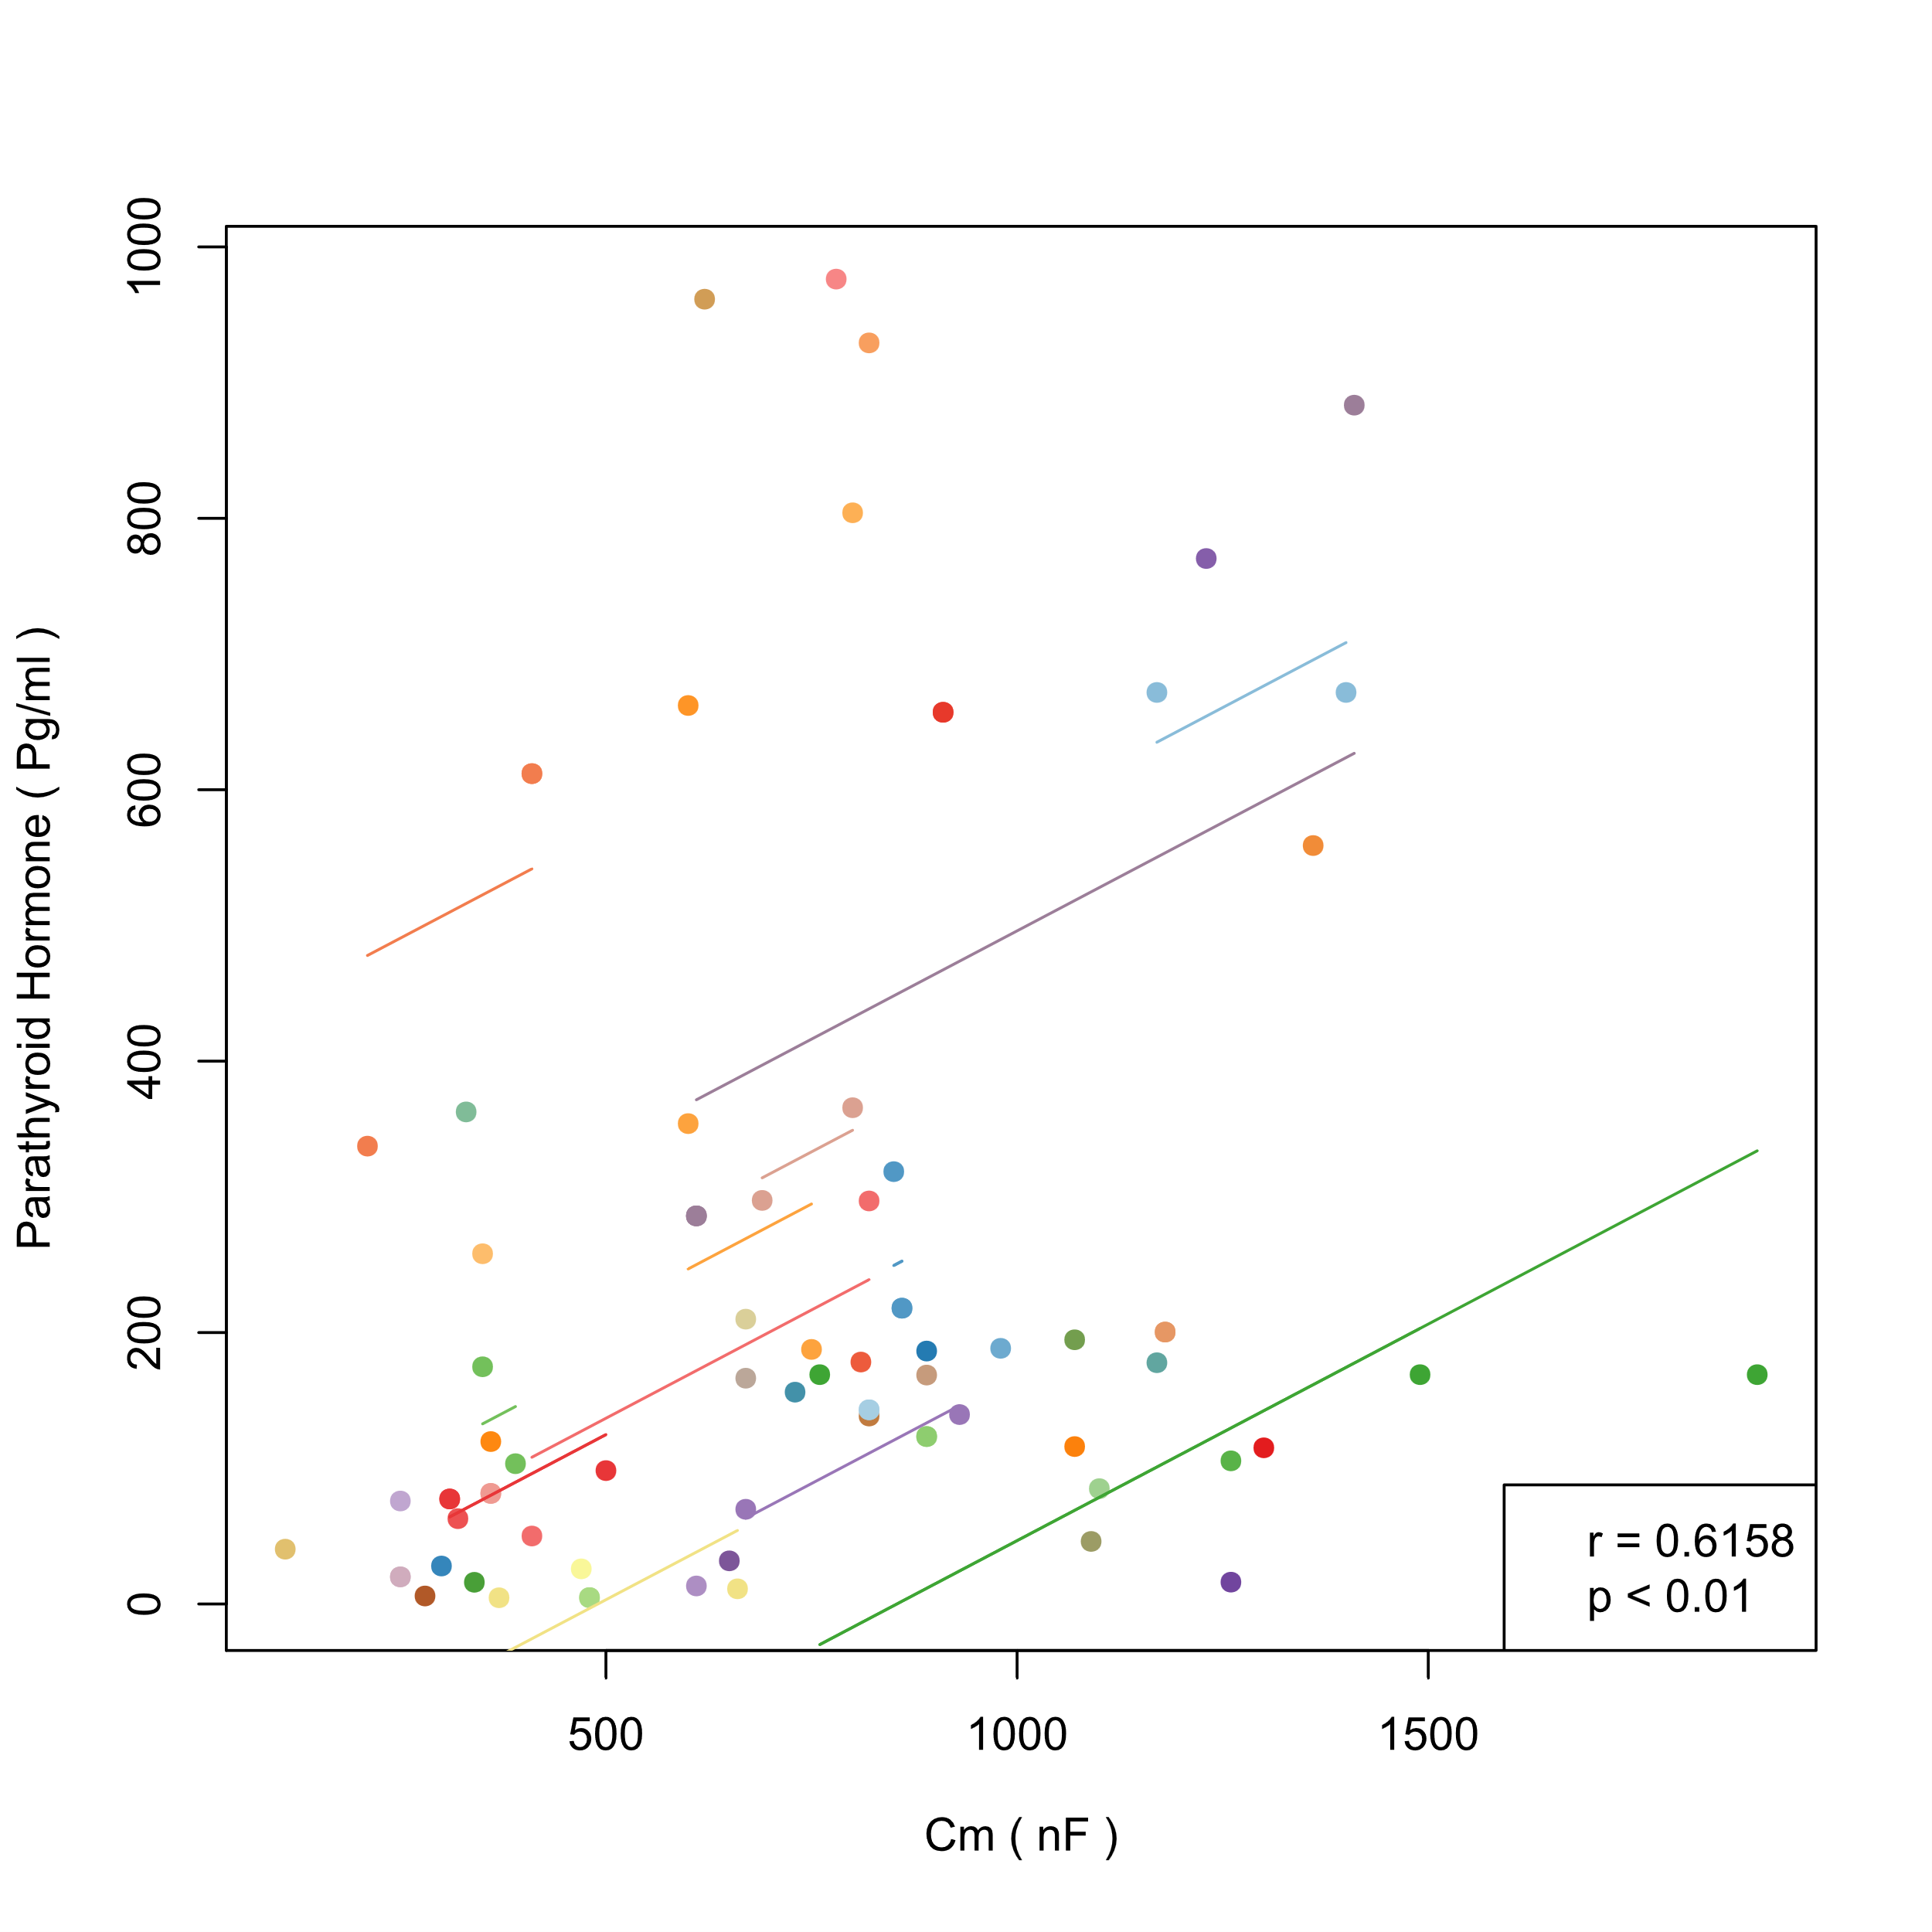  **(a)** Alb and Cm | 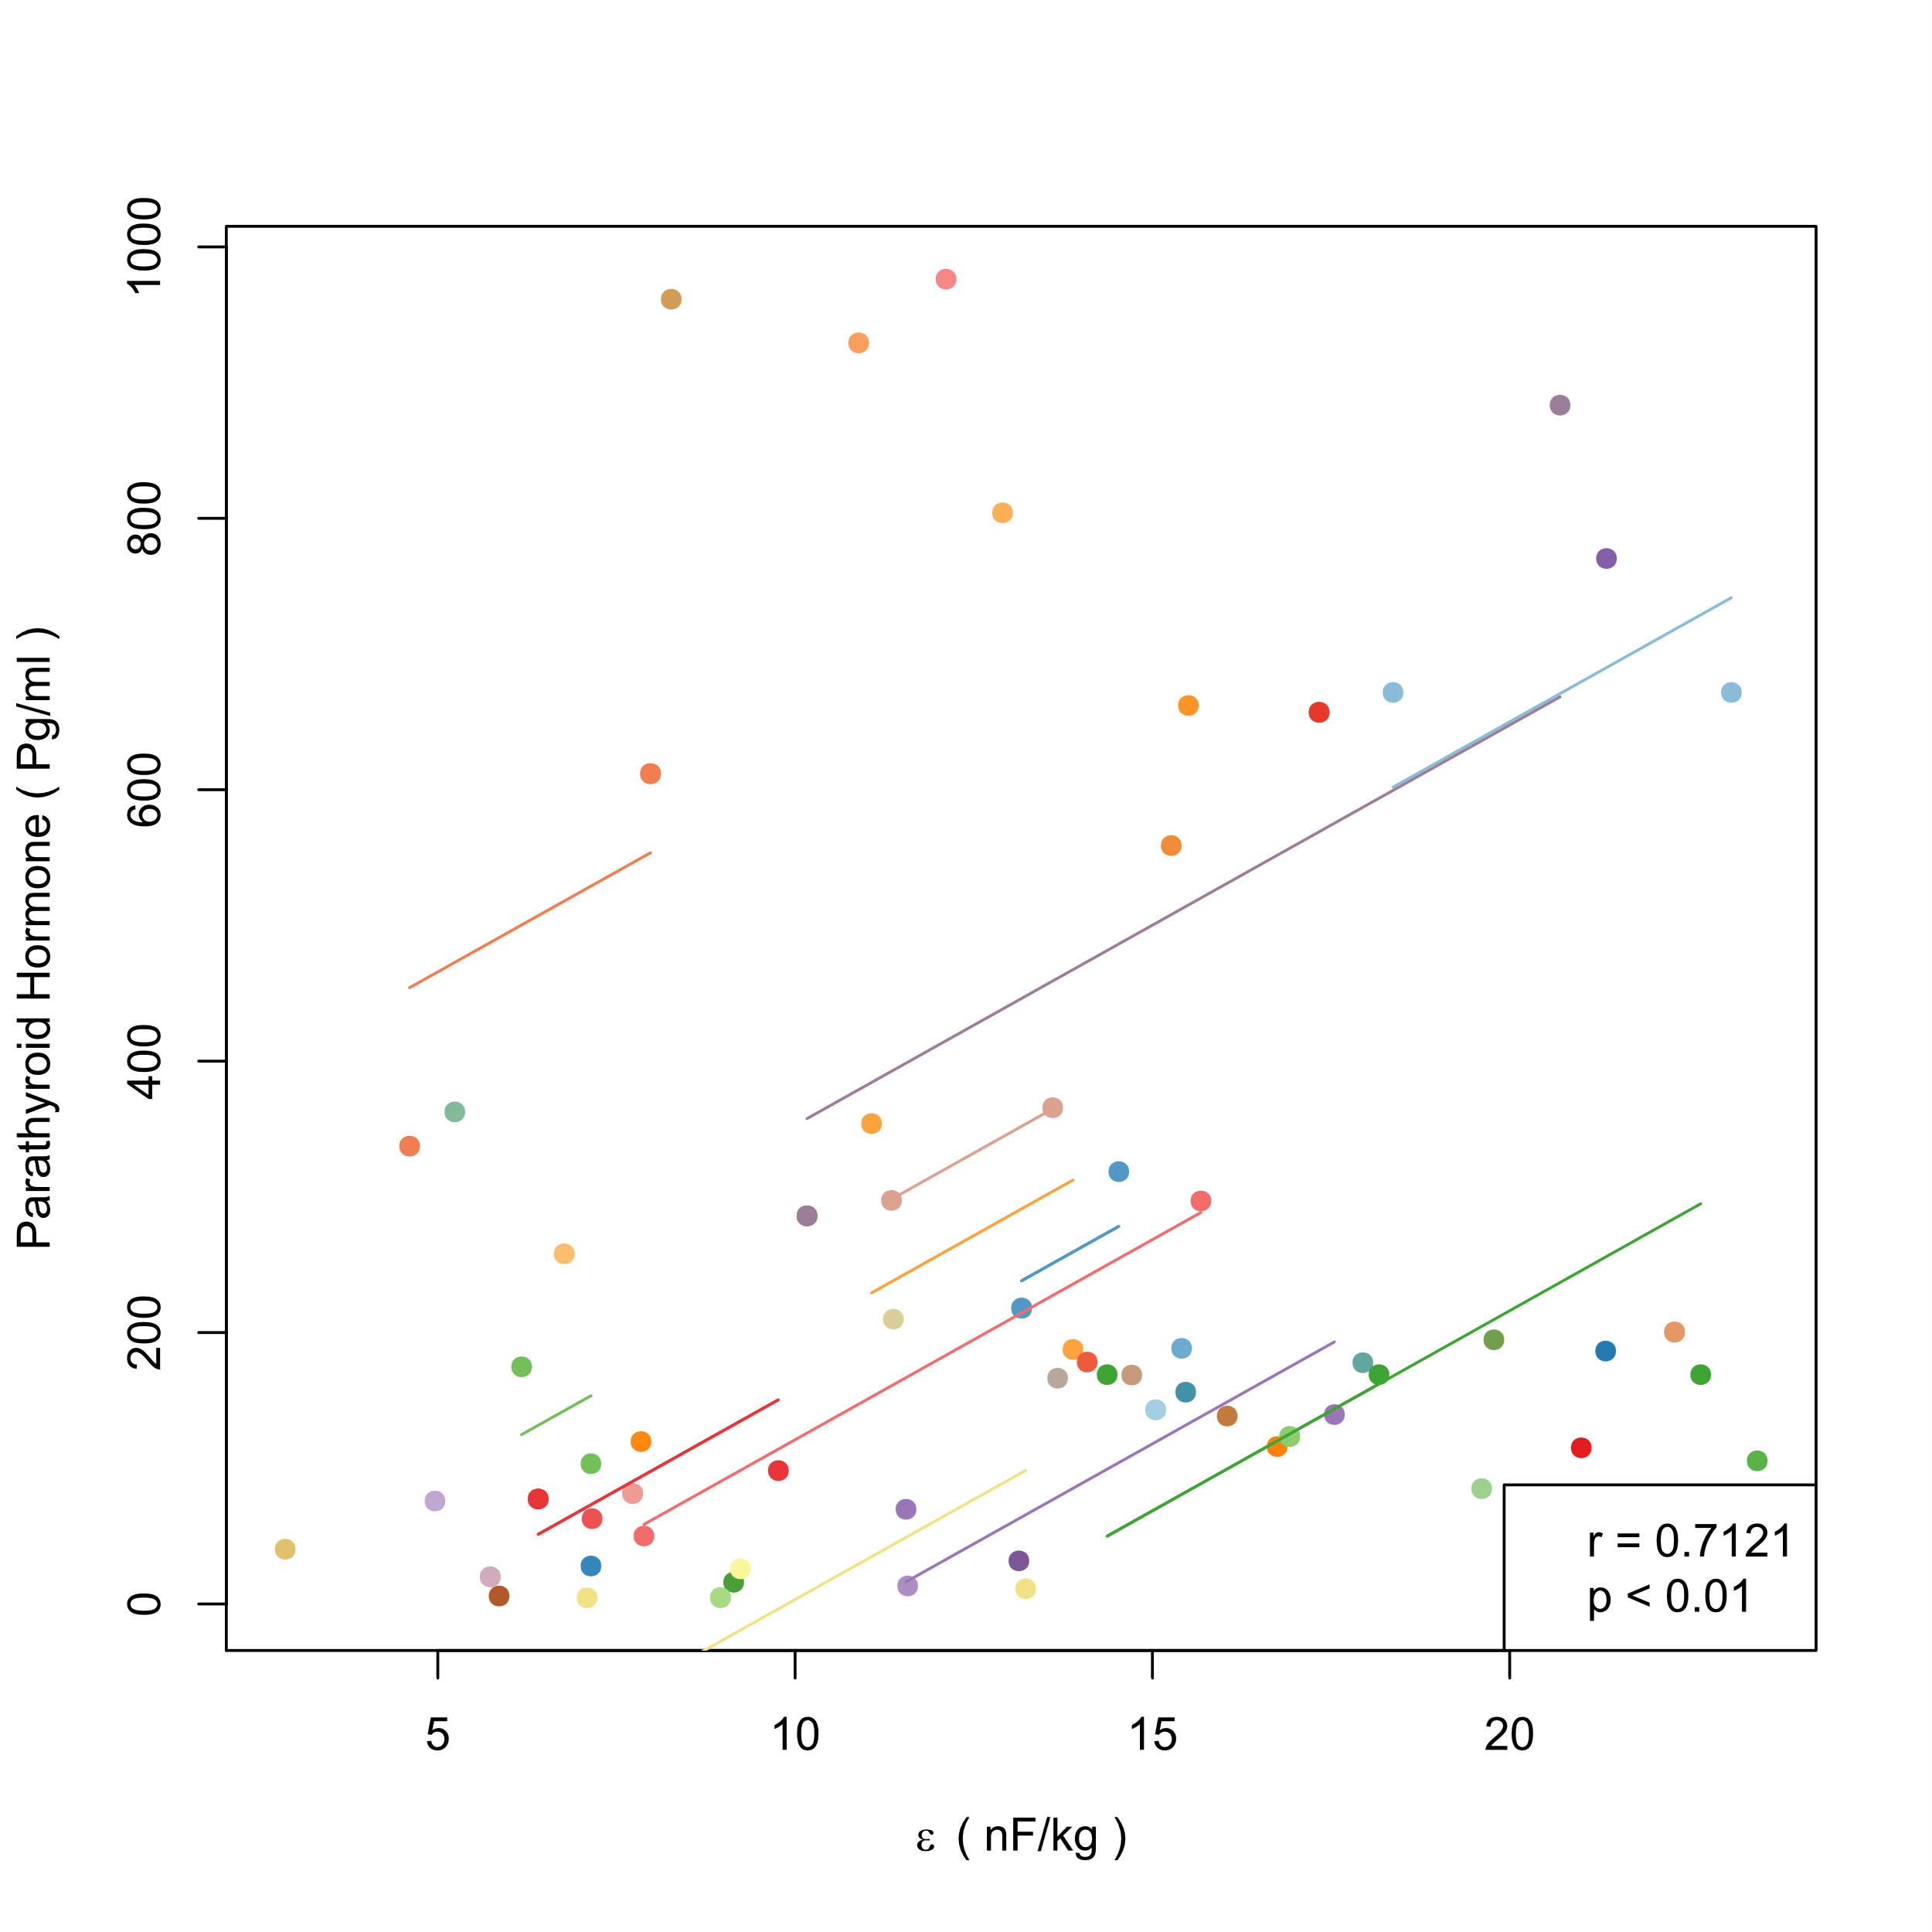  **(b)** Alb and ε |
| --- | --- |
| 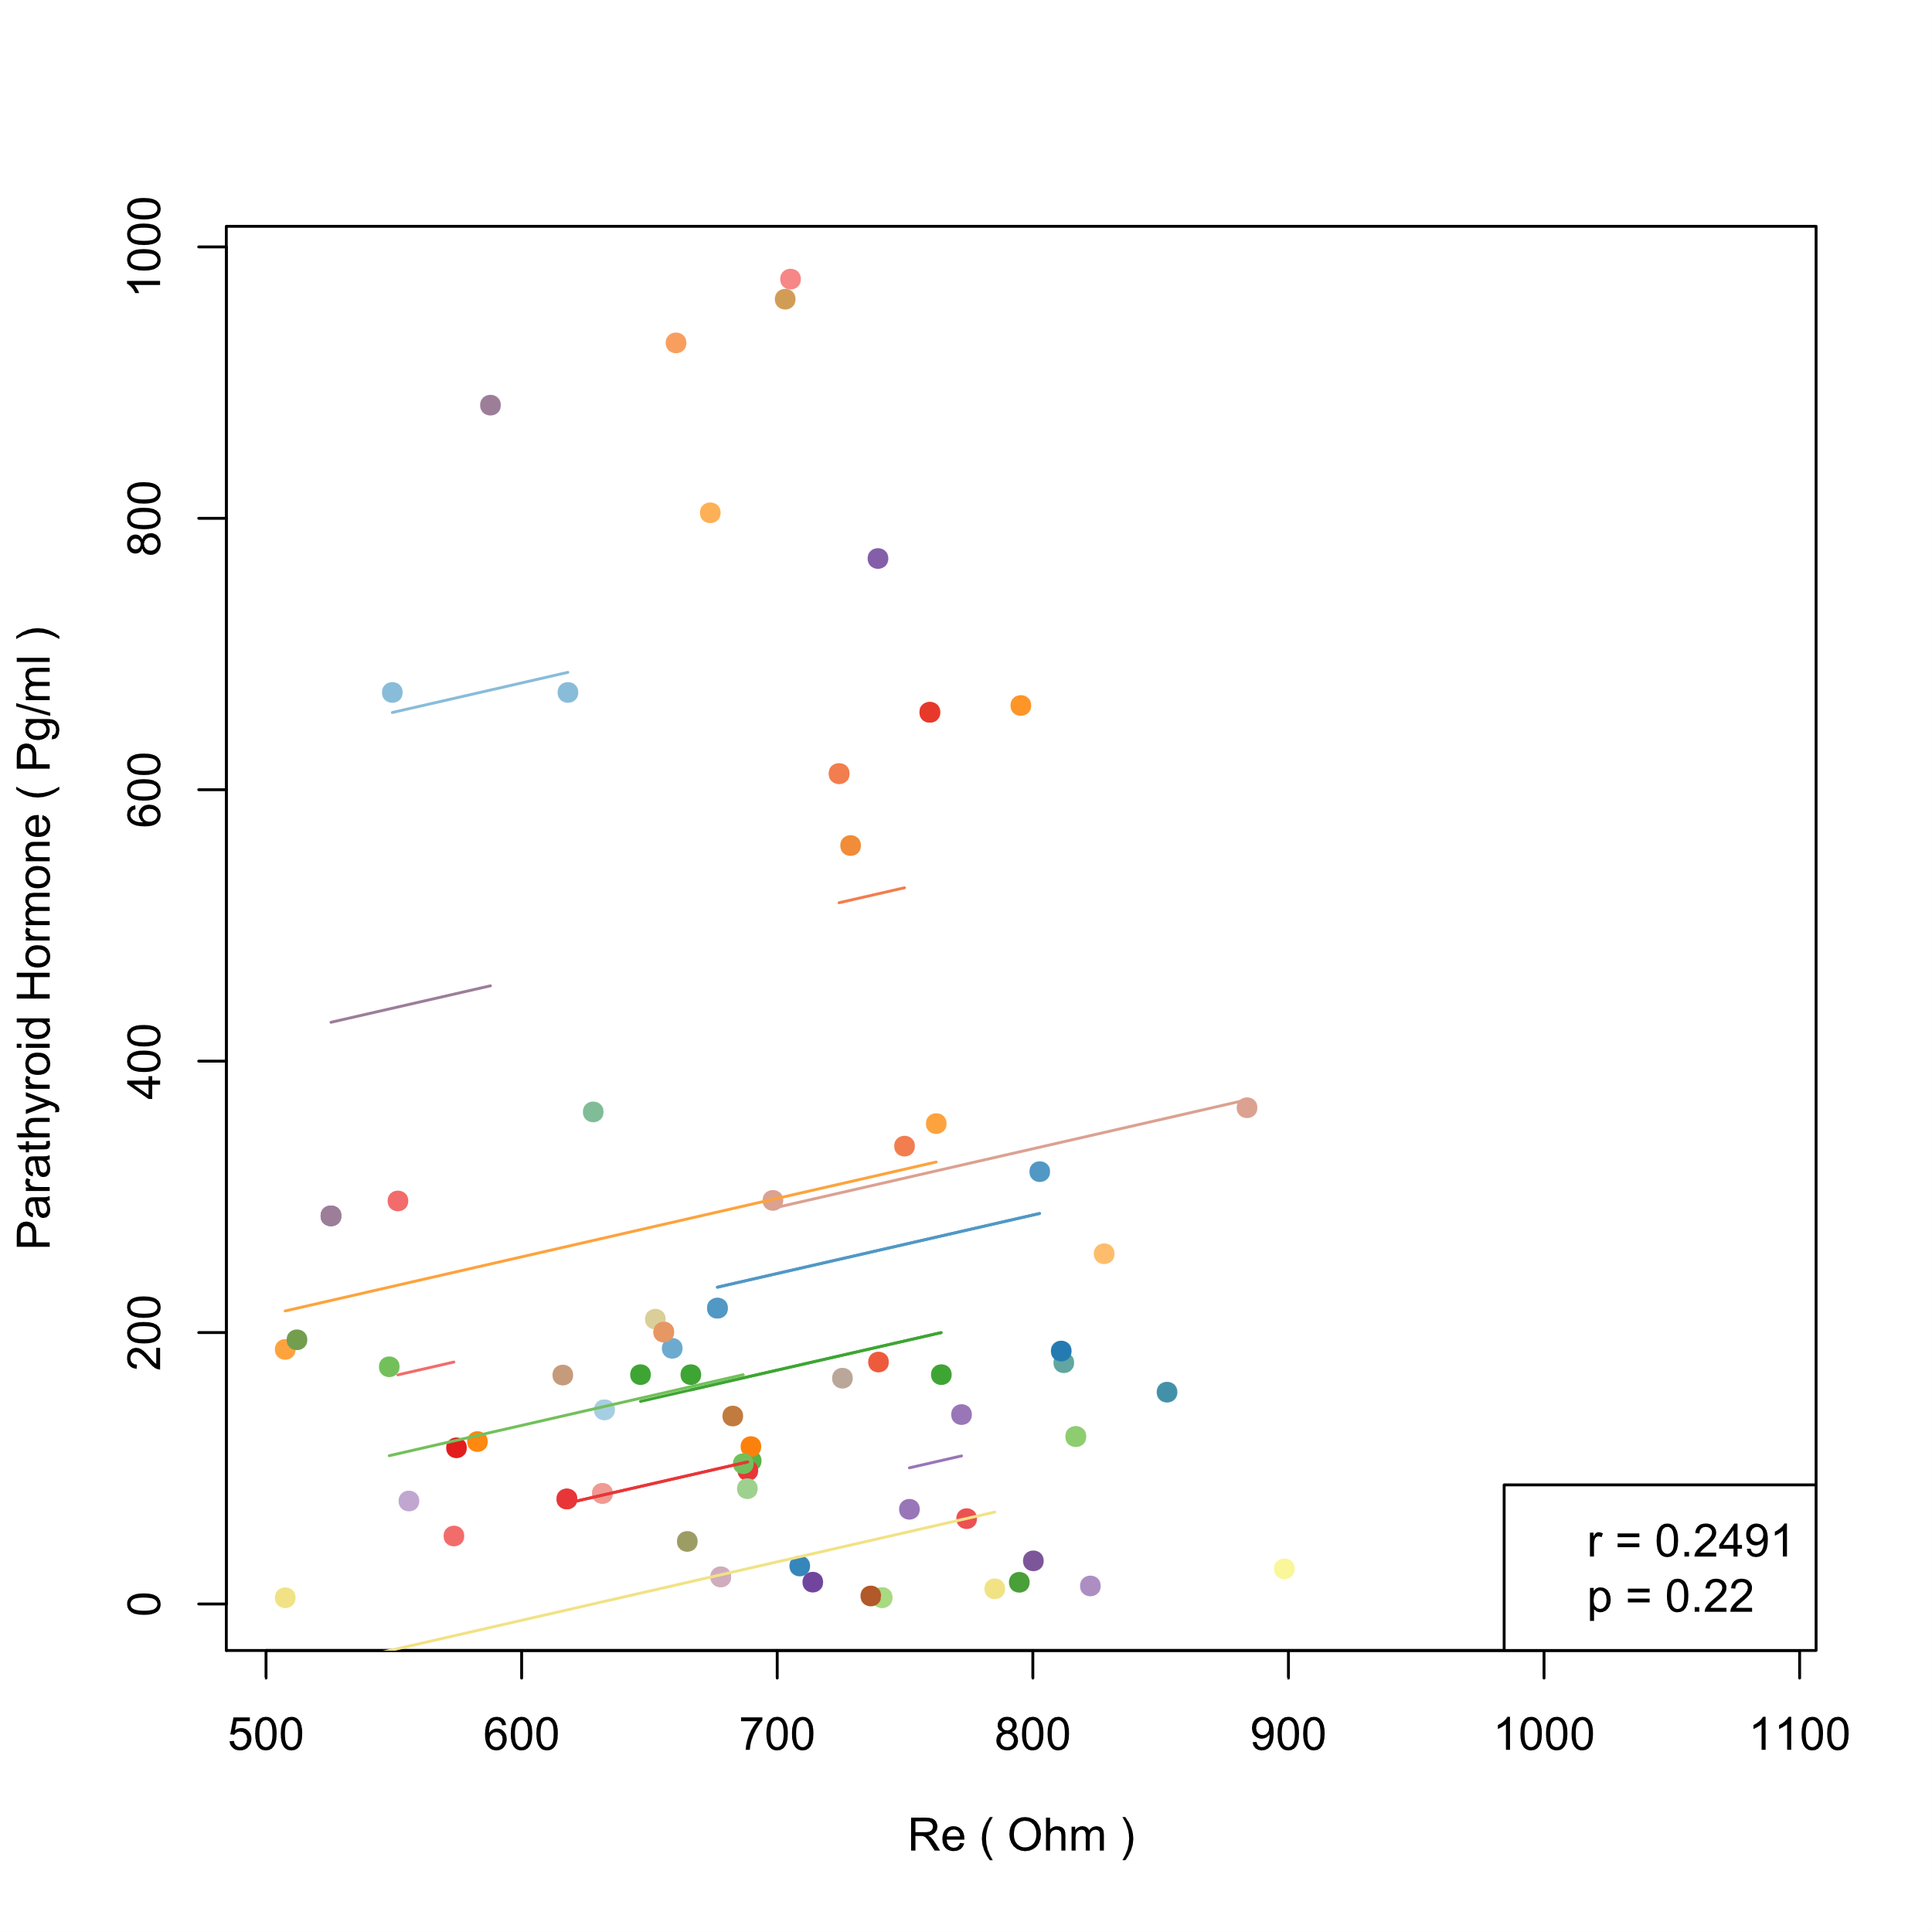  **(c)** Alb and Re | 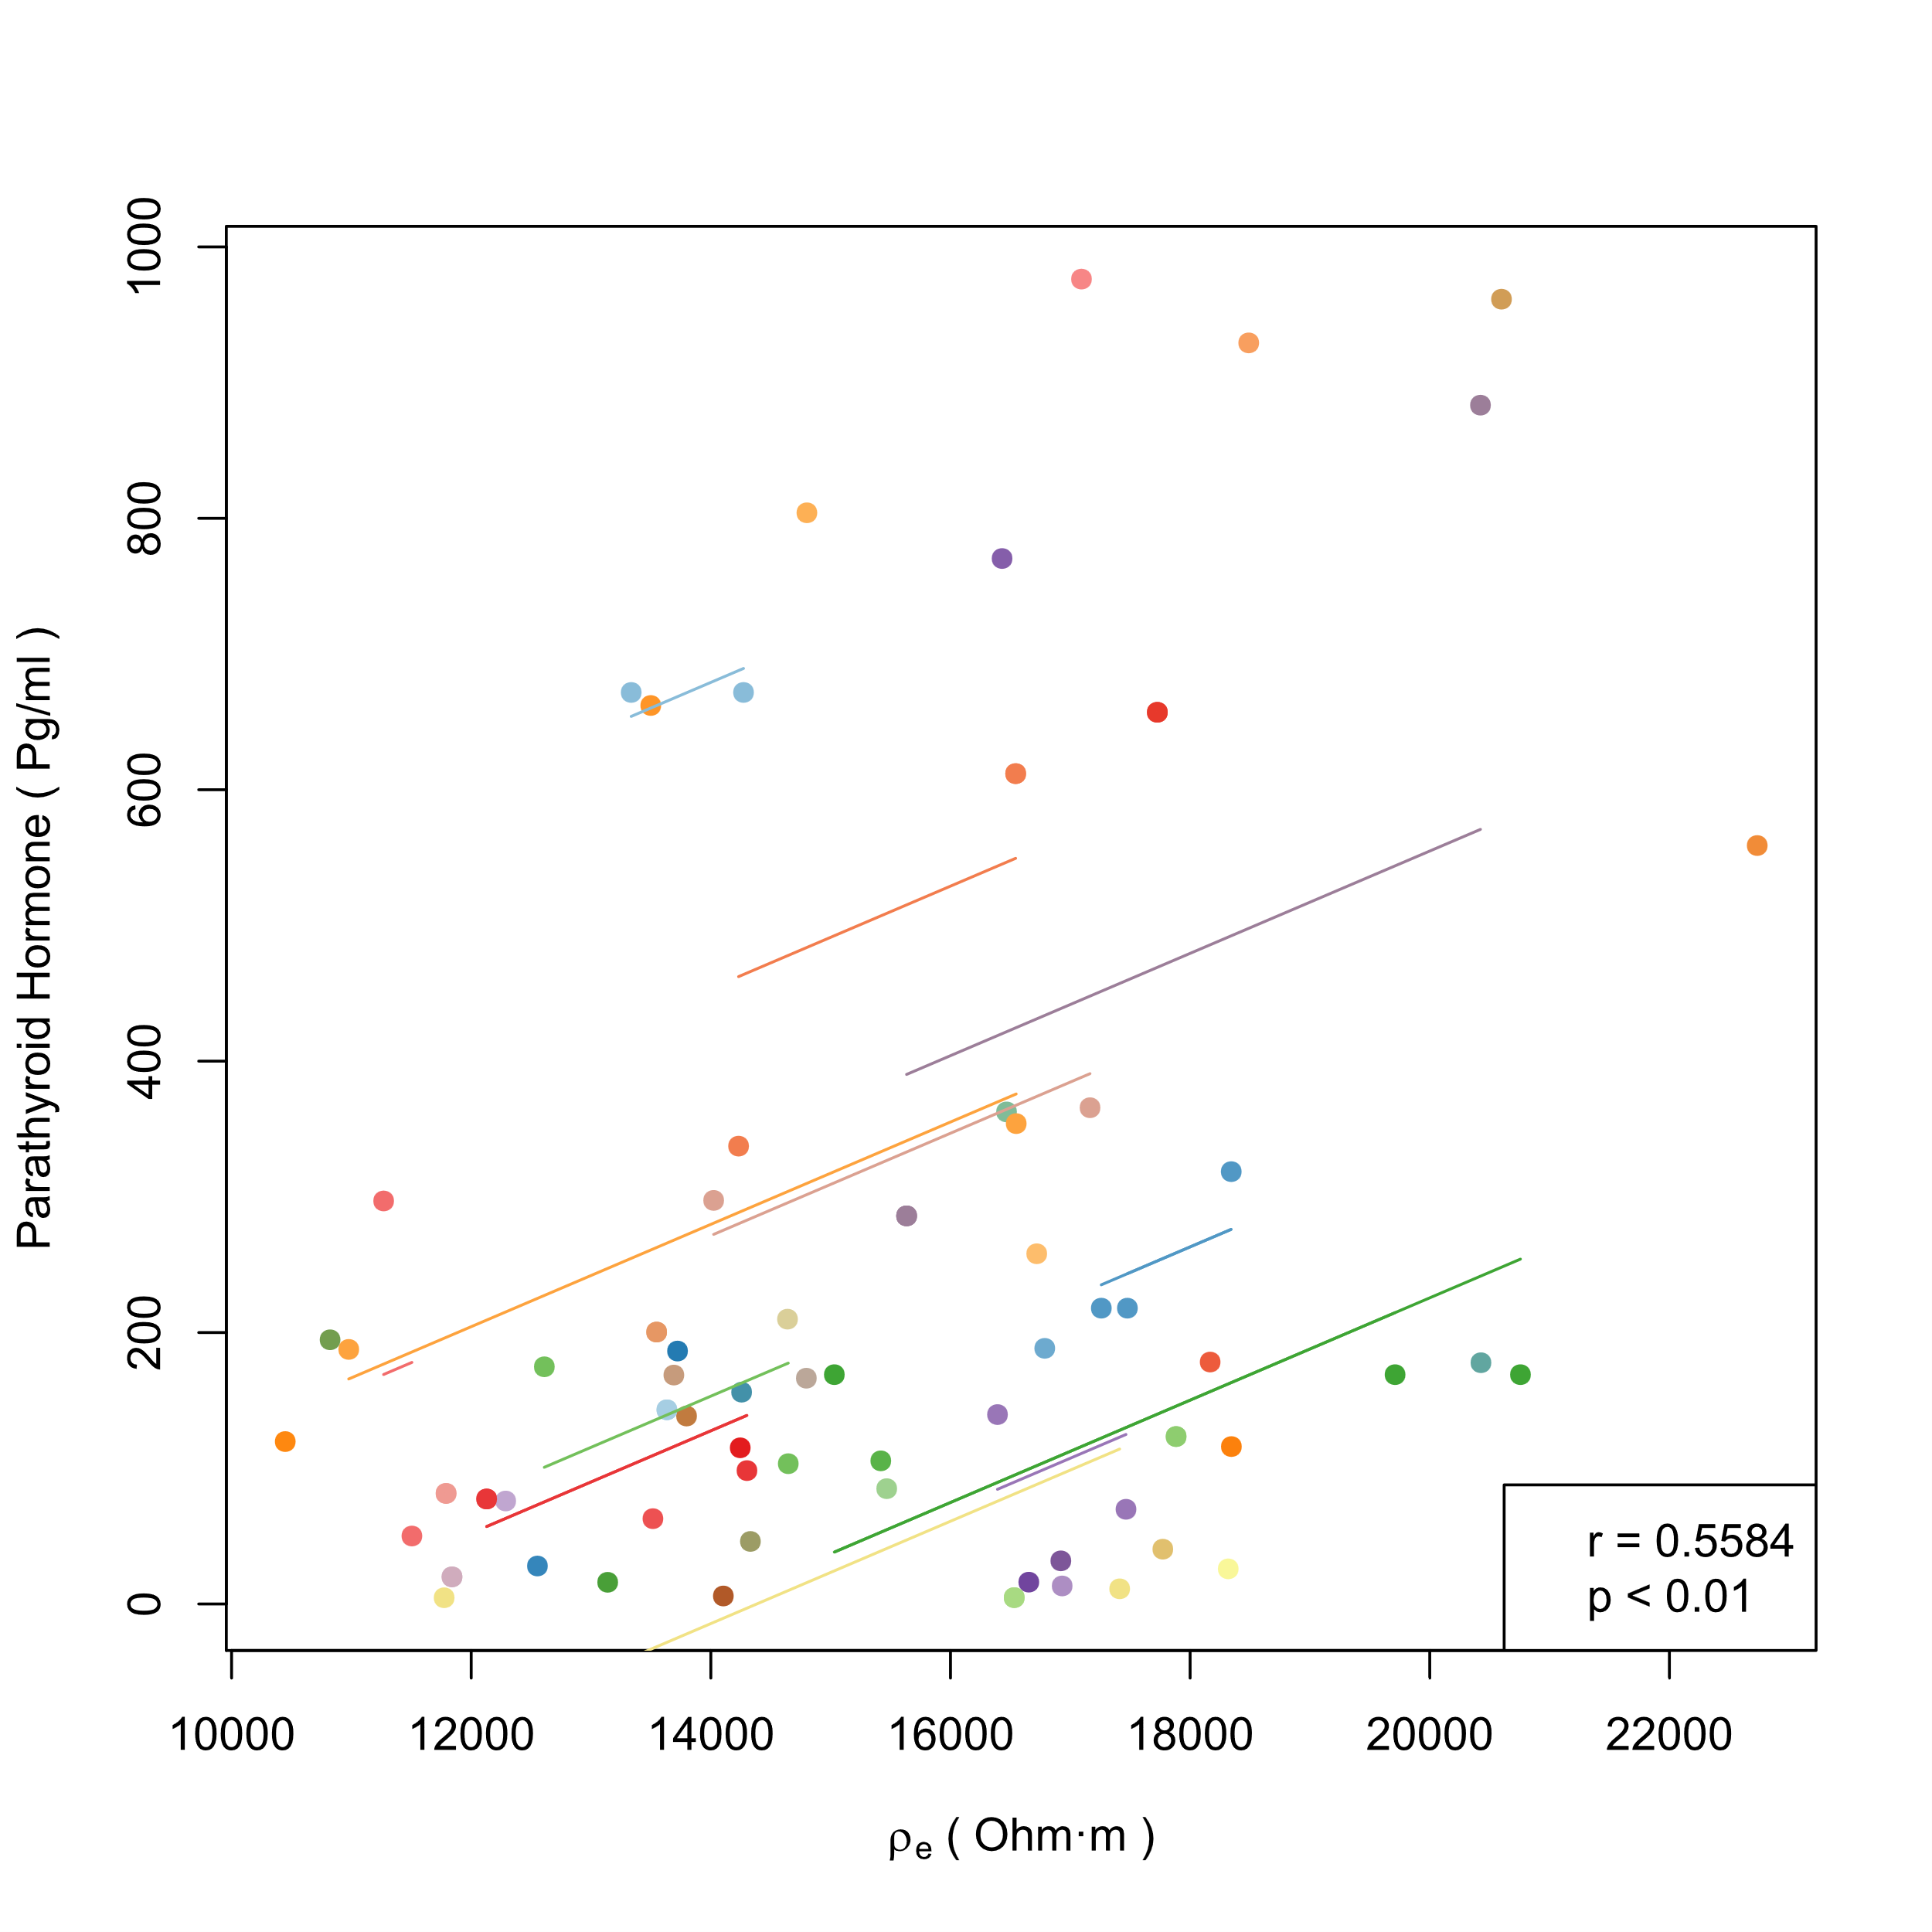  **(d)** Alb and ρe |
| 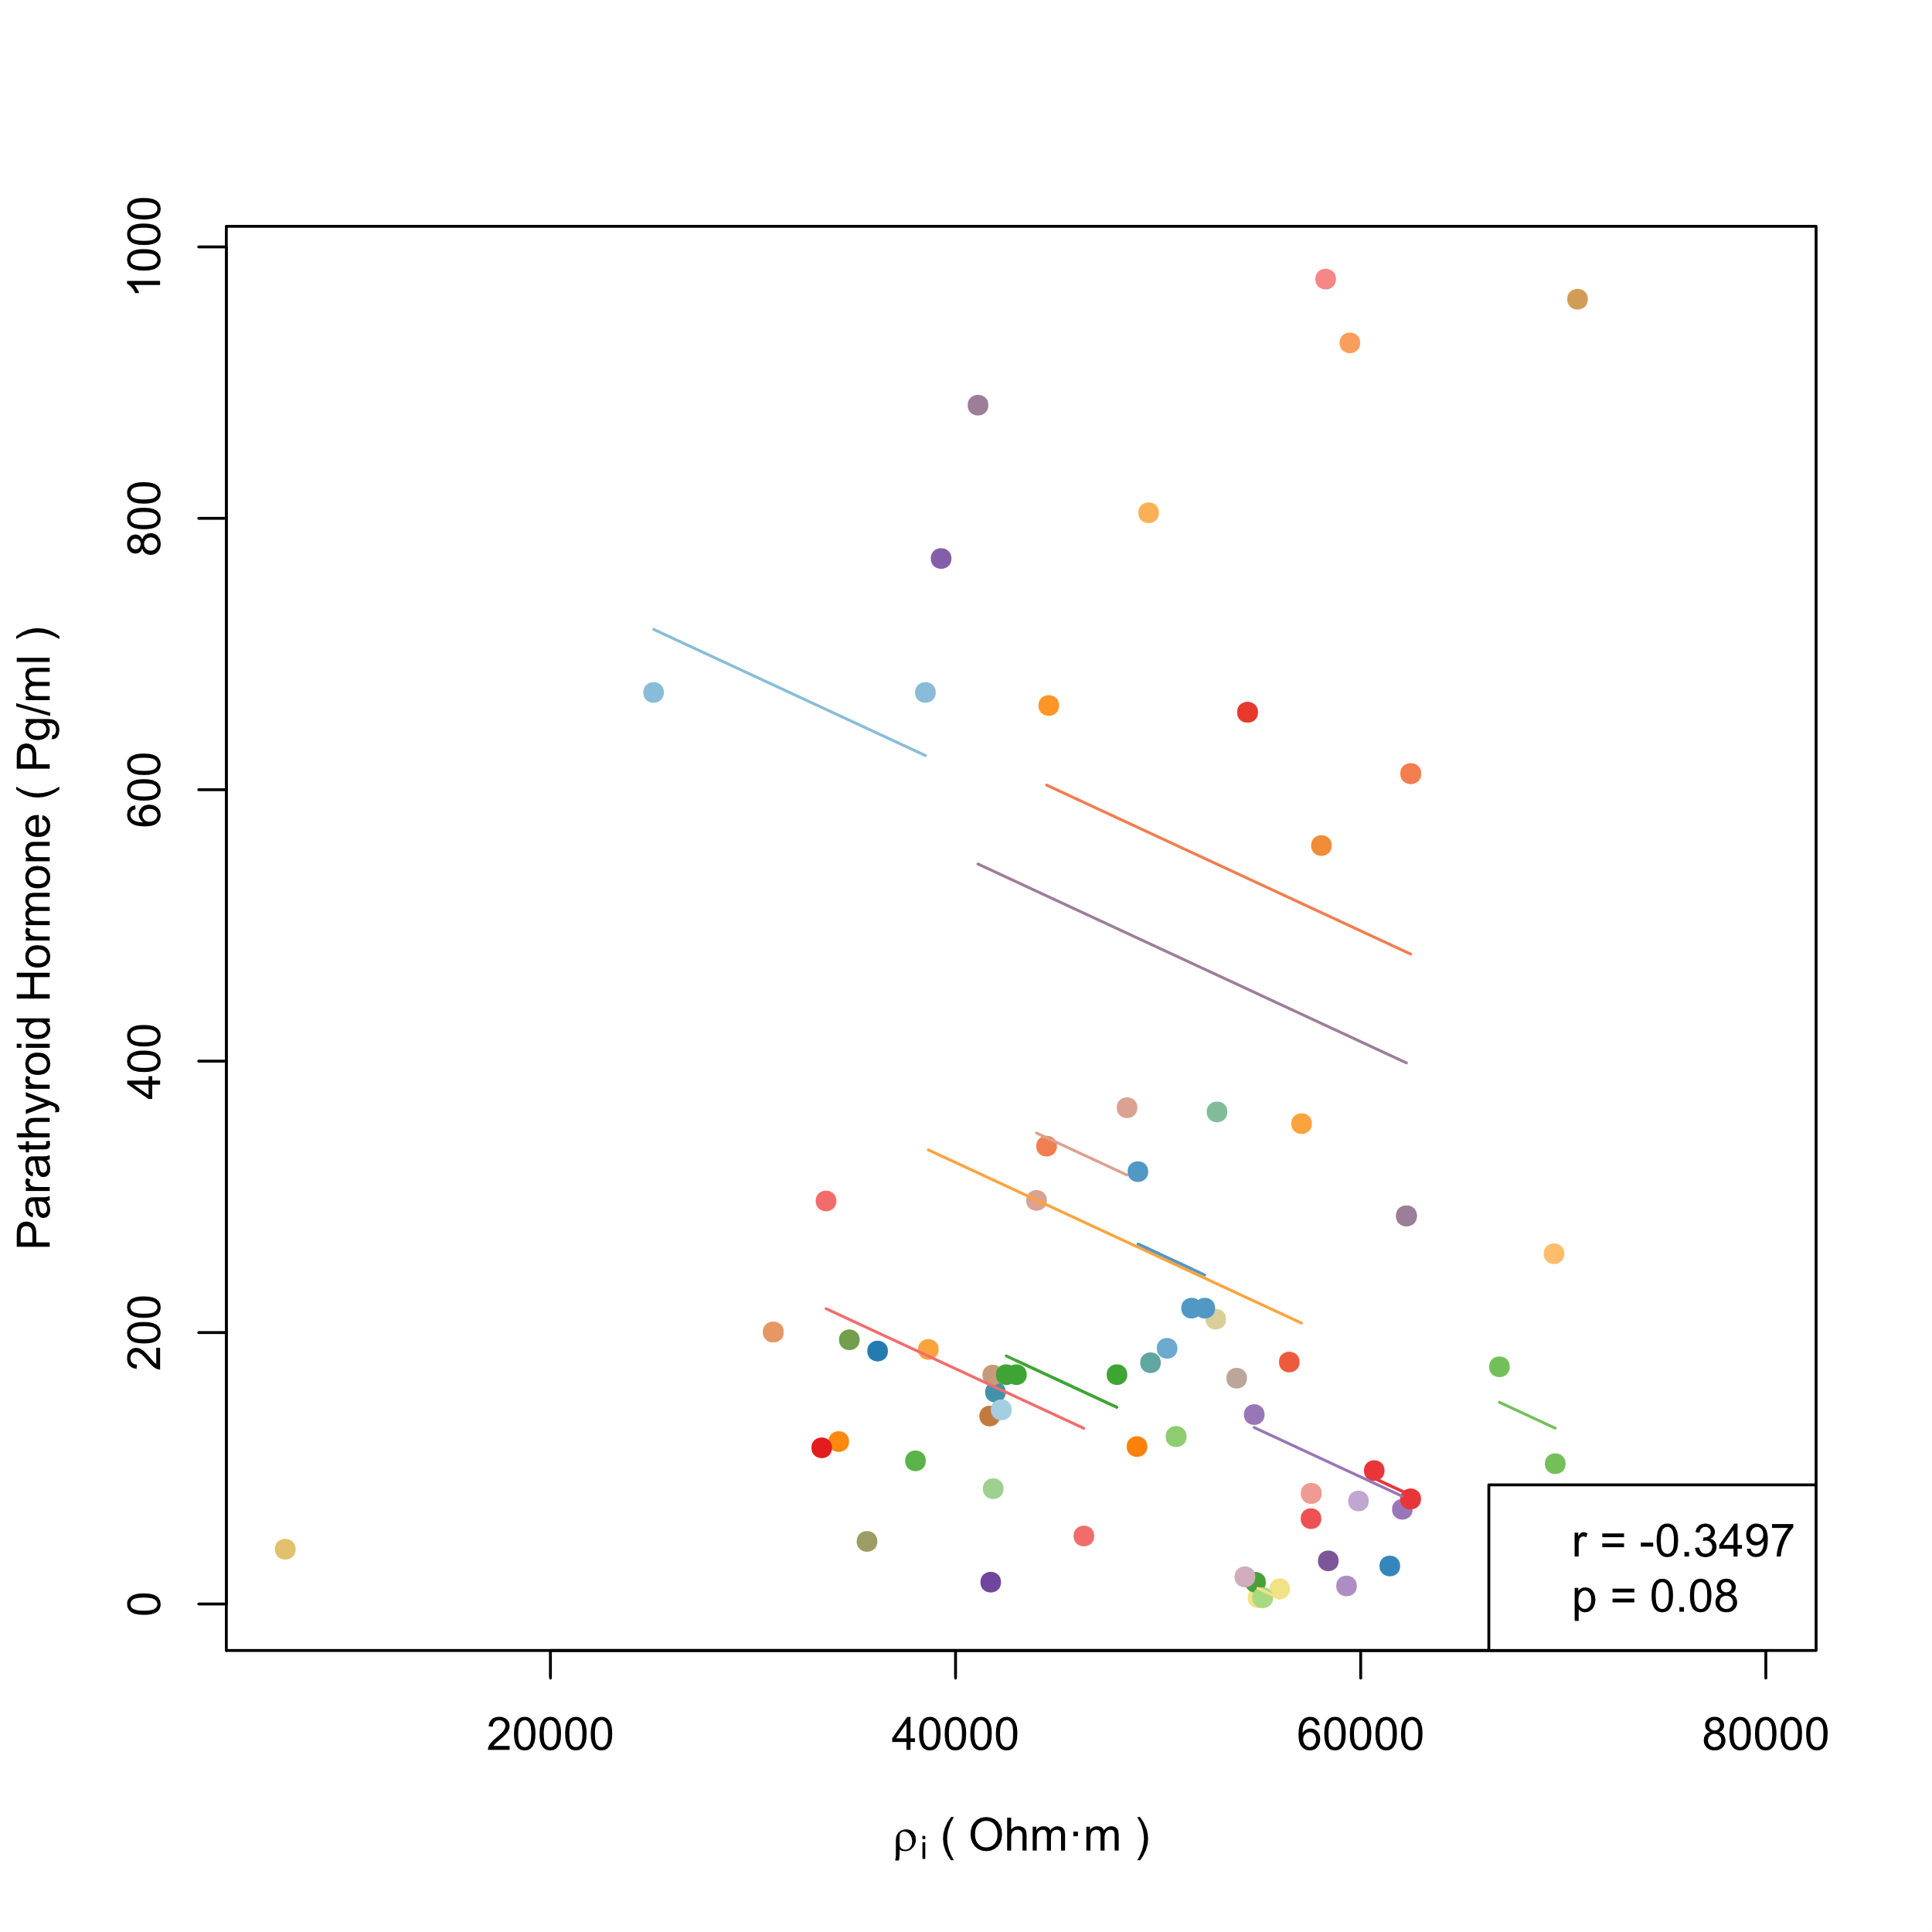  **(e)** Alb and ρi | 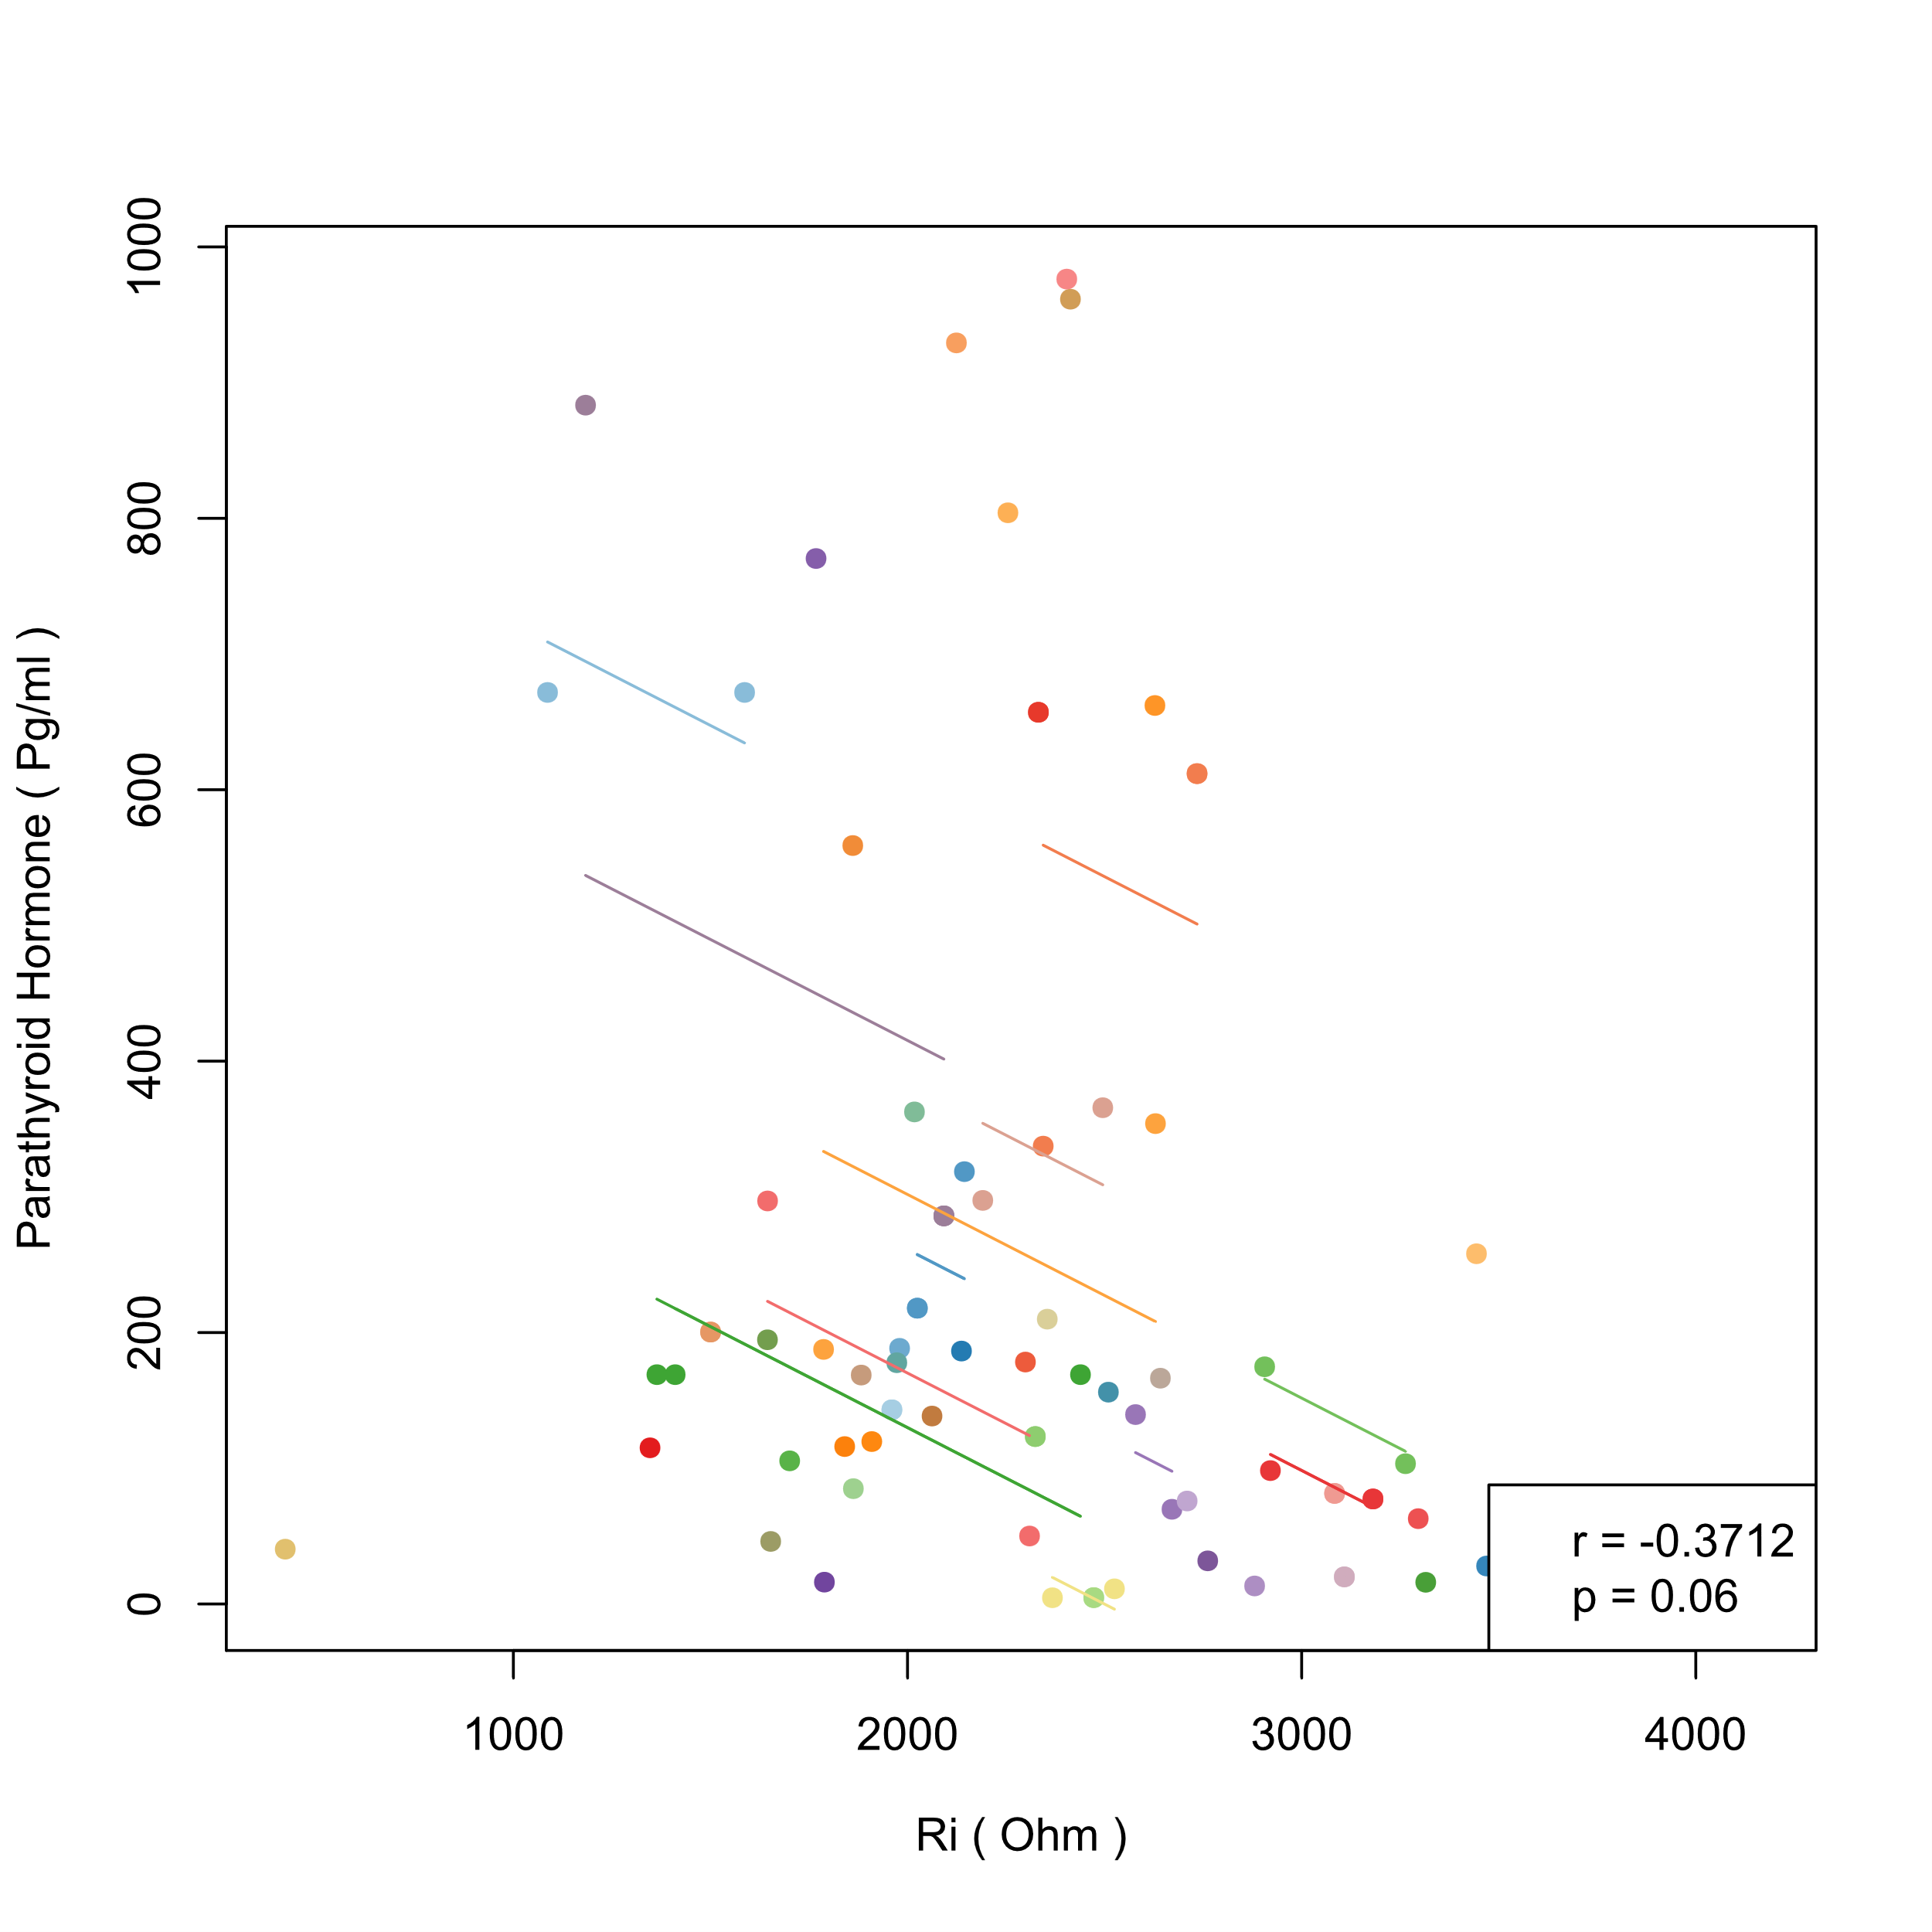  **(f)** Alb and Ri |

**Figure S6. (a-f) Intra-individual correlations between parathyroid hormone (PTH) and bioelectrical indices in women (each color represents a patient, different points in each color represent samples of the patient measured at different times, line of the color represents the regression result of intra-individual correlation on the samples of this patient. r and p in the legend are the correlation coefficient and p value of hypothesis testing in repeated measures correlation)**
